# Supplementary material
Source: HighWire-hosted journal article supplement (https://bjsm.bmj.com/content/53/2/90)
Supplement: inline-supplementary-material-1 [file inline-supplementary-material-1.docx]

**Online supplement**

**1) Additional results**

*Study characteristics*

Randomized controlled trials (RCTs)

There were 23 randomized controlled trials (RCTs; n=3,468) including 13 exercise-only interventions (1-13) and 10 exercise + co-interventions which consisted of education on pregnancy-related topics, including the role of pelvic floor muscles in pregnancy and post-partum, anatomical and physiological changes occurring during pregnancy, nutrition, non-pharmacological pain prevention and management strategies, labor, and ergonomics (14-23). One study focused on women who were obese (using the author’s definition BMI≥ 30.0) (4) and one focused on women who were suffering from depression (as diagnosed with the Structured Clinical Interview for Depression) (1). The interventions included yoga (1, 2, 10), aerobic exercise (3, 9, 18), general muscle strengthening (11) or muscle strengthening specific to one body region (13, 15, 16, 20, 22) and the combination of aerobic and resistance training (4-8, 12, 14, 17, 19, 21, 23). Fifteen of these studies involved exercise supervision by a member of the study team at least once every two weeks (1-3, 5-12, 14, 16, 19, 24), in six the intervention was both supervised and self-reported (4, 13, 15, 21-23) and women were encouraged to perform exercise on their own in two of them (17, 18).

Non-Randomized Interventions

The five non-randomized exercise interventions reported on 278 pregnant participants including two exercise-only interventions (25, 26) and three exercise + co-interventions which consisted of education on pregnancy-related topics including anatomical and physiological changes occurring during pregnancy and possible associated musculoskeletal disorders, ergonomics, nutrition, pain management strategies and labor (24, 27, 28). One trial had a general muscle strengthening intervention (27), two focused on specific muscle strengthening (26, 28) and two used a combination of aerobic and resistance training regimens (24, 25). Three of the interventions were regularly supervised (24, 25, 28), one was both supervised and self-reported (26), and one was not supervised (27).

Observational studies

There were three cohort studies included in our analysis with 4,163 pregnant participants (29-31), and one case-control study with 5,304 pregnant participants (32).

Exercise was assessed using self-reported data and questionnaires. The tools used to assess the outcomes included: Visual Analogue Scale, Numerical Rating Scale, Pain diagram or drawing, pain subscale of the Brief Pain Inventory, Roland-Morris Low Back Pain and Disability Questionnaire, and modified versions of the Quebec Back Pain Disability Scale.

**Results for non-randomized interventions and observational studies**

Note: The results from RCTs are in the manuscript.

Odds of Low back pain (LBP), pelvic girdle pain (PGP) and lumbopelvic pain (LBPP) during pregnancy

Findings from one non-randomized exercise-only intervention (“very low” quality evidence, downgraded due to very serious risk of bias and serious inconsistency) were consistent with the findings from RCTs (Online supplement Figure 4) (25).

In contrast, there was “very low” quality evidence (downgraded due to serious inconsistency) from one cohort study that could only be reported narratively (incomplete reporting of data) showing that prenatal exercise reduced the odds of LBP in late pregnancy (32 weeks) when exercise was performed once to twice per week (OR: 0.80, 95% CI 0.66, 0.97) compared to once a week or less (Online Supplement Table 1) (30).

There was “very low” quality evidence (downgraded due to very serious risk of bias, and serious inconsistency) from two cohort studies reporting on the association of exercise-only intervention and the odds of maternal PGP. Results from one study revealed that prenatal exercise did not lower the odds of PGP during pregnancy (n=343; OR: 1.66, 95% CI 0.99, 2.78; Online supplement figure 5) (31). However, the cohort study by Gjestland et al., that could not be entered in the meta-analysis (see above) reported decreased odds of PGP in late pregnancy (32 weeks) when exercise was performed at least three times per week (OR: 0.76, 95% CI 0.61, 0.96) compared to once a week or less (Online Supplement Table 1) (6).

Severity of symptoms for LBP, PGP and LBPP during pregnancy

Findings from non-randomized interventions (24, 26-28) were consistent with findings from exercise-only RCTs. There was “very low” quality evidence from one non-randomized exercise-only intervention (downgraded due to serious risk of bias, and serious inconsistency) showing a decrease in the severity of LBP during pregnancy with prenatal exercise compared to no exercise (n=89; MD: -9.57 [large effect size], 95% CI -11.30, -7.84; Online supplement Figure 6) (26). Similarly, there was “very low” quality evidence (downgraded due to very serious risk of bias, serious inconsistency, and serious indirectness) from three non-randomized exercise + co-interventions showing that prenatal exercise decreased the severity of LBP during pregnancy (pooled estimated based on 1 study, n=56; MD: -1.46 [large effect size], 95% CI -2.70, -0.22, see online supplement Figure 7) (27). The other two non-randomized exercise + co-interventions that could not be included in the meta-analysis (due to absence of a no-exercise control group or incomplete reporting of data) supported this result (Online Supplement Table 1) (24, 28). Specifically, Beyaz et al. reported that at least 30-minute of aerobics three times per week (intervention group, n=15) from the second trimester until the 37th week of pregnancy decreased LBP intensity (p<.001) compared to no exercise (control group, n=21) (24). Similarly, Singh et al. reported that two short education and exercise demonstration sessions aimed to correct and improve posture decreased LBP intensity after a 3-week intervention period (n=15; mean scores difference -2.7/10, p<0.05) (28).

In contrast, there was “very low” quality evidence (downgraded due to serious risk of bias and serious inconsistency) from a single cohort study that could only be reported narratively (incomplete reporting of data), showing that performing regular exercise in the 3rd trimester was not predictive of changes in average LBP severity during pregnancy (Mann-Whitney U -1.37 p>0.05) (29).

Odds of Low back pain, pelvic girdle pain and lumbopelvic pain during the postpartum period

Additional data from one non-randomized intervention supported this finding with “very low” quality evidence (downgraded for very serious risk of bias, and serious inconsistency) showing that the exercise-only intervention did not affect the odds of LBP during the postpartum period (n=65; OR: 1.30 95% CI 0.34, 4.97; Online supplement Figure 9) (25).

In contrast, there was “very low’ quality evidence (downgraded for very serious risk of bias and serious inconsistency) from one case-control study (reported narratively) showing that being physically active during pregnancy decreased the odds of PGP at 6 months postpartum (n=5304; OR: 0.87 95% CI 0.77-0.99 p=0.028) (32).

**2) Supplementary Tables**

Supplemental Table 1. Study Characteristics

| **Outcome** | **Author, year, country, study type** | **Sample Size (n)** | **Age, years** | **Complications/ Pre PA** | **PA Assessment** | | | | | **Results** |
| --- | --- | --- | --- | --- | --- | --- | --- | --- | --- | --- |
| **Self-Reported/Objective and Total PA/LTPA** | **Definition PA groups** | **Frequency**  **Intensity**  **Duration**  **Type** | **co-intervention** | **Compliance** |
| LBP | Suputtitada et al., 2002, Thailand, RCT(13) | E: 32 C: 35 | Not reported | Not regularly exercising (<1x/week) | Self-reported LTPA | Do pelvic tilt exercise 2x/day (morning and evening), 5x/week for 8 weeks during the 3rd trimester. | 2x/day  5x/week,  Intensity and duration not reported,  Sitting pelvic tilt exercise | - | Not reported | Data in forest plot |
| LBP | Garshasbi et al., 2005,  Iran,  RCT(5) | E: 107  C: 105 | All participants: 26 | - | Objective, LTPA | The supervised exercise programs included 15 movements in 60 min. These movements were: 5 minutes of slow walking, 5 minutes of extension movements, and 10 minutes of general warming up, 15 minutes of anaerobic exercise, 20 minutes of specific exercise and 5 minutes return to the first position. The exercises were recommended by Tarbiat Modares Faculty of Sport and tested for pregnant women by physiotherapists. The women were offered to exercise three times a week. A midwife supervised all women. The intensity of the exercise was controlled by maternal pulse rate. For pulse rates exceeding 140 per minute, the exercise stopped. Every woman who missed three sessions was excluded from the study. Total of 12 weeks during the 2nd and beginning of the  3rd trimester of pregnancy | 3x/week  HR </= 140bpm  60 minutes  Combination of walking, specific exercise, and anaerobic exercise | - | E: 66.5% (missed 3 sessions = excluded)  C: 100% (no drop out) | Data in forest plot |
| LBP | Sedaghati et al.,  2007  Iran  RCT(12) | E: 50  C: 50 | E: 23.3 ± 2.5  C: 23.3 ± 4.2 | - | Objective, LTPA | The supervised program was scheduled with the aim of strengthening of the abdominal muscles, hamstrings muscles and increasing the traction of iliopsoas and paravertebral muscles on an aerobic basis. The exercise programs included 15 minutes warm up and cool down plus 30 minutes cycling in the range of 55-65% of the maximal HR with respect to the age. The warm up consisted of 5 minutes extension movements, 5 minutes slow cycling and cool down (return to the first condition) consisted of 5 minutes extension movements. Cycling exercise used as a protocol for the study is defined as 30 minutes of cycling exercise, three sessions a week at a moderate intensity. Moderate intensity exercise requires the following criteria: 1) Maximum heart rate (HRmax) between 55-69%; 2) VO2peak between 50% -74%; and 3) the Rating of Perceived Exhaustion (RPE) as either 12 or 13. The study uses HR to define moderate intensity. The target HR (HRmax between 55–65%) is determined based on Karvonen’s formula. The intensity of the exercise was measured using a Polar S810 Heart Rate Monitor (Polar co, Denmark). During the running of the whole program the supervision is accomplished by a midwife. Also every woman missing three sessions of the exercise was excluded from the study. The intervention took place during the 2nd and beginning of the  3rd trimester of pregnancy | 3x/week  55-65% HRmax  45 minutes  Cycle Ergometer - aerobic | - | 100% Attendance - women missing 3 sessions were excluded | Data in forest plot |
| LBP | Field et al.,  2012  USA  RCT(2) | E: 28  C: 28 | All participants: 26.6 | - | Objective, LTPA | The supervised yoga and massage sessions began after group assignment at approximately 20 weeks gestation and continued for 12 weeks until 32 weeks gestation when the second assessment was made. For the yoga sessions, a trained yoga instructor provided a 20-minute yoga routine that was designed especially for second and third trimester pregnant women with consultation from our OB/GYN collaborator. | Frequency and intensity not reported,  20 minutes  Yoga | - | 82% | Data in forest plot |
| LBPP | Stafne et al.,  2012 Norway  RCT(23) | E: 429  C: 426 | E: 30.5 ± 4.4  C: 30.4 ± 4.3 | E: 34% reported no exercise at time of inclusion;  14% (n=60) said exercise regularly at least 3x/week at study entry  C: 12% (n=50) said exercise regularly at least 3x/week at study entry | Objective, LTPA | Women in the intervention group received a standardized exercise program including aerobic activity, strength training, and balance exercises. Training sessions of 60 minutes in groups of 8 –15 women instructed by a physiotherapist were offered once per week over a period of 12 weeks (between 20 and 36 gestation weeks).Each group session consisted of three parts. The first included 30 –35 minutes of low-impact aerobics (no running or jumping). Step length and body rotations were reduced to a minimum, and crossing of legs and sharp and sudden changes of position were avoided. The aerobic dance program was performed at moderate intensity, defined as 13 and 14 on the Borg rating scale of perceived exertion. The second included 20 –25 minutes of strength exercises using body weight as resistance, including exercises for the upper and lower limbs, back extensors, deep abdominal muscles, and pelvic floor muscles. Three sets of 10 repetitions of each exercise were performed. The third included 5–10 minutes of light stretching, body awareness, breathing, and relaxation exercises. In addition, women were encouraged to follow a written 45-minute home exercise program at least twice per week (30 minutes of endurance training and 15 minutes of strength and balance exercises). Adherence to the protocol was defined as exercising 3 days per week or more at moderate to high intensity. Performing the exercise program was strongly emphasized and recorded in the women’s personal training diaries and through reports from the physiotherapists leading the training groups. | 1x/week  Borg: 13-14  60 minutes  Combination: aerobic, strength training and balance exercises | Education (written  information and recommendations on pelvic floor muscle  exercises, diet and pregnancy-related LBPP) | E: 55% of women followed recommended exercise protocol. 95% reported weekly PFMT at follow-up; C:10% in control group exercised 3 days per week or more at moderate to high intensity at follow-up. 79% reported weekly PFMT at follow-up | Data in forest plot |
| LBP  PGP | Miquelutti et al.,  2013 Brazil, RCT(18) | E: 97  C: 100 | E: 22.9 ± 4.6  C: 22.9 ± 5.1 | E: 25.8% practiced physical activity prior to pregnancy  C: 31% practiced physical activity prior to pregnancy | Self-reported,  LTPA | Women in the exercise group were encouraged to do 30 minutes of daily aerobic exercise, but they did not keep exercise logs to validate this. Attended a birth preparation program (50 minutes) on a monthly basis to 30 weeks, biweekly up to 36 weeks and weekly until delivery. Supervised sessions included PFMT and education. | 7x/week  moderate  210+ minutes/week  Pelvic Floor Training, Aerobics | Education: information was provided on the prevention of pain in pregnancy, the role of the pelvic floor in pregnancy, delivery and in the postpartum, the physiology of labor, breathing exercises for delivery, and non-pharmacological pain control techniques during labor. Women were also encouraged to practice aerobic exercise daily for at least 30 minutes and received written  information based on the ACOG guidelines | Not reported | Data in forest plot |
| LBP  PGP | Petrov Feiril et al.,  2015  Sweden, RCT(11) | E: 51  C: 41 | E: 30.8 ± 3.6  C: 30.6 ± 3.4 | Physically Active - IPAQ | Self-reported,  LTPA | The supervised intervention group practiced high-repetition, resistance training twice a week for 12 weeks (pregnancy weeks 14–25), performed using light barbells and weight plates, which was carried out while listening to music in a supervised (by the research coordinator) group exercise setting. The exercises were self-adjusted to each woman’s condition of pregnancy and performed at a self-estimated, moderate to vigorous intensity. Each session was 60 minutes long, including warm-up and wind-down. All major muscle groups were trained repeatedly (50–80 repetitions for each muscle group) during 3–5 minutes, including shorter breaks.  Control received a home based training program. | 2x/week  moderate-vigorous  60 minutes  High repetition resistance training | - | Attendance range was 67 to 100% | Data in forest plot |
| LBPP | Eggen et al.,  2012 Norway  RCT(14) | E: 129  C: 128 | E: 30.6 ± 4.8  C: 30.0 ± 4.8 | - | Objective,  LTPA | They received supervised exercises, including ergonomic advice, in groups and were advised to do home exercises. Each weekly group exercise session lasted 60 minutes, and the groups trained for 16 to 20 weeks (between gestation weeks 16 and 36). Each group training session started with 20 to 30 minutes of aerobic activity, including stepping, walking, or light jogging on a BOSU balance ball, accompanied by varied arm movements. Following the aerobic activity, the women performed knee bends, toe raises, and pelvic floor-muscle contractions in couples. Furthermore, the women performed 4 standardized exercises such as the “birddog,” the “buttock lift,” leaning forward with the arms against a wall or in ropes, and sitting on a Swiss ball with or without the feet on the floor.  Control received standard care. | 1x/week  Intensity not reported  60 minutes  Pelvic floor training, aerobics, stretching, joint mobilization, relaxation exercise | Education: ergonomic - received information about normal changes in pregnancy,  ergonomic advice, and reminders about the importance of combining  physical activity with short breaks and optimal rest | Median #of session is 11 (25th-75th percentiles =5.5-14) | Data in forest plot |
| PGP | Kordi et al.,  2013  Iran  RCT(17) | E: 35  C: 35 | E: 26.5 ± 5.4  C: 25.5 ± 5.6 | - | Self-reported,  LTPA | Exercises were designed to strengthen the pelvic girdle muscles. The subjects in the exercise group were asked to perform the following exercise programs; 1) aerobic exercises: brisk walking with a medium intensity (was defined as 64 to 76% of maximum heart rate) for 25 minutes per day and 3 days per week. 2) Stretching exercises: performing hamstring, inner thigh, side waist, quadriceps and back stretch for 3 times per week. In this regards, the duration of each occasion was determined as 10 to 20 seconds and the patients were asked to perform the exercises 2 times per day while each of the mentioned exercises had to be repeated at least 3 to 5 times per each exercise bout. 3) Strengthening exercises: a program including forward bending, back pressing, diagonal curling, upper body bending, leg lift crawling along with Kegel exercise and pelvic tilt was given to the patients. The patients were asked to repeat each exercise (duration of each occasion was asked to be 3 to 10 seconds) 3 to 5 times per each exercise session for both sides of the body while performing 2 exercise bouts per day and 3 days per week. The intervention lasted 6 weeks (inclusion in the study between the 20th and 32th weeks of gestation).  Control group received general information about posture. | 3x/week  64-76%HRmax  25+ minutes  Aerobics, stretching, muscle conditioning | Information: received general information about the anatomy, body posture, and ergonomic advices regarding sitting, walking and lying. | Not reported | Data in forest plot |
| LBP | Kashanian et al.,  2009  Iran  RCT(8) | E: 15  C: 15 | E: 25.0 ± 3.4  C: 24.6 ± 3.0 | No regular exercise before entering the study | Objective,  LTPA | Supervised warm up: 4.5 minutes; Time: 21 minutes; Cool Down: 4.5 minutes; Prescribed Sessions: 24 (8weeks; 3x/week) | 3x/week  Intensity not reported  90 minutes/week  Walking- treadmill,  Walking- not treadmill  Resistance Training,  Stretching | - | Not reported - exclusion after three absences from the study program | Data in forest plot |
| LBP  PGP | Haakstad et al.,  2015  Norway RCT(7) | E: 52  C: 53 | E: 31.2 ± 3.7  C: 30.3 ± 4.4 | Pre-pregnancy exercise levels did not include participation in a structured exercise programme  >60 min once per week or brisk walking >120 min per week for the past 6 months | Objective,  LTPA | Supervised 12-week exercise programme (inclusion in the study between the 12th and 24th week of gestation) including 60 minutes of supervised aerobic dance performed at least twice a week. Each started with five min warm-up, followed by 35 minutes of aerobic dance, including cool-down. This was followed by 15 minutes of strength-training with a special focus on the deep abdominal stabilisation muscles, pelvic floor, and back muscles. The last 5 minutes were devoted to stretching, relaxation and body awareness exercises. The aerobic dance routine included low-impact exercises and step-training. In addition to joining the scheduled aerobic classes, all women in the exercise group were asked to have 30 minutes of moderate self-imposed physical activity on the remaining weekdays. They were advised to incorporate short bouts of activity into their daily schedules (e.g., walking instead of using the car for short distances and using the stairs instead of the elevator).  Control group maintained usual activity levels | 2+/week  Borg: 12-14  60 minutes  Aerobic dance | - | 14/52 women had 100% adherence, 40% attended 80% or more of the recommended sessions, 60% participated in less than 80% of recommended sessions. 16 women (31%) adhering to a minimum of 15 moderately intense exercise 3 to 5 times a week; based on registrations done by aerobic instructors | Data in forest plot |
| LBP | Nilsson-Wikmar et al.,  2005  Sweden  RCT(20) | E(home): 41  E(clinic): 37  C: 40 | E (home): 29.5 ± 3.3  E (clinic): 29.7 ± 5.4  C: 28.4 ± 3.9 | E(home):  no PA n=13; 1x/week n=16; 2x/week or more n=12  E(clinic):  no PA n=8; 1x/week n=15; 2x/week or more n=14  C: no PA n=10; 1x/week n=14; 2x/week or more n=16 | Self-reported,  LTPA | The Home Exercise Group included 41 women who received information and a sacroiliac belt as the Information Group, but in addition, they were given a home exercise program consisting of 3 exercises aiming to stabilize the muscles around the pelvic girdle. The exercises were performed with a ball between the knees in sitting, in standing, and in 4-point kneeling position with movements of the arms or the legs. The program was ended with stretching of the hamstrings, hip flexors, and calf muscles. The instructions about the program were given within 1 week after inclusion, and the women were followed up once shortly after receiving the program. The In Clinic (outpatient treatment) Exercise Group included 37 women who received information and a sacroiliac belt in the same way as the Information Group, but in addition participated in a training program comprised of 4 different strengthening and stabilization exercises with different pieces of equipment; the lateral pulls, standing leg press, sit-down rowing, and curl-ups. The adjustment of the load, number of sets, and repetitions was calculated based on 20 maximal repetitions and the exercises were carried out with the adjusted load for 3 series of 15 repetitions. For warm-up, biking on a stationary bike was used. The program was ended with stretching. The exercises were performed twice a week until gestation week 39 (inclusion in the study between the 8th and 35th week of gestation). A physical therapist gave the instructions twice, and thereafter the patient exercised alone, but with the ability to ask a physical therapist for further instructions or adjustments of the load. | 2x/week – clinic  Intensity and duration not reported  Strengthening and stabilizing exercises | Education + sacroiliac belt received information about the condition including anatomy, body posture, and ergonomic advice and were provided with a nonelastic sacroiliac belt. | Not reported | Data in forest plot |
| LBPP | Ozdemir et al.,  2015  Turkey RCT(21) | E: 48  C: 48 | E: 29.2 ± 5.4  C: 30.1 ± 4.3 | All women had pregnancy related lower back pain.  Not performing exercise for half an hour at least 3 days a week during pregnancy | Self-reported,  LTPA | The duration of the exercise program was 4 weeks (inclusion in the study between the 20th and 35th week of gestation). Participants were offered a choice of two types of exercise according to the weather conditions. The first option comprised exercises performed on a mattress, including stretching, tightening and loosening movements that targeted large muscle groups from the neck to the vertebrae. The nurse explained that the mattress exercises would start with a 5-minute warm up, continue for at least 15-20 minutes at mid-tempo and end with a 5-minute cool down. The second option was a walking exercise. The participants were expected to warm up for 5 minutes, increase their speed for 5 minutes, continue at mid-tempo for 15 minutes and complete a 5-minute cool down. It was emphasized that the pulse rate should be between 120-160/minutes when the participants reached mid-tempo;12 total sessions | 3x/week  120-160bpm  90 minutes/week  Walking- not treadmill,  Mattress exercises | Education: about the prevention of pregnancy related LBPP, the structure and function of the vertebrae,  physical changes occurring during pregnancy, causes of  pregnancy-related LBPP, the problems that the pain causes,  methods of pain management, correct posture development,  body mechanics during activities of daily life and ergonomics - The participants were given illustrated booklets explaining the effects of  pregnancy exercises on maternal and foetal health, situations that need attention before starting and during exercises, signs of danger, what should be done in potentially dangerous situations, how to breathe during exercise and the method, frequency and amount of the exercise. | All pregnant women attended and completed all 12 sessions for 30 minutes exercise programme | Data in forest plot |
| LBPP | Morkved et al., 2007, Norway, RCT(19) | E: 148  C: 153 | E: 28.0 ± 5.3  C: 26.9 ± 3.9 | - | Objective,  LTPA | They trained with a physical therapist in groups of 10-15 women for 60 minutes once per week for 12 weeks (between pregnancy weeks 20 and 36). Each session included: 15-20 minutes aerobic activity. Aerobic exercises included low impact aerobics (no running or jumping). Step length and body rotations were reduced to a minimum, and crossing of legs and sharp and sudden changes of position were avoided. The aerobic dance program was performed at moderate intensity, defined as 13 and 14 on Borg’s rating scale of perceived exertion; 30-35 minutes of exercises including 5 sets of specific strength training of the pelvic floor muscles exercises aiming at activation of dorsal and ventral muscle-tendon-fascia slings, specific low force contractions of the transversely oriented abdominal muscles, and exercises for the upper and lower limbs using body weight as resistance (e.g. push-ups in different positions and squatting). Three sets of ten repetitions of each exercise were performed; 5-10 minutes of light stretching, body awareness, and breathing and relaxation exercises. | 1x/week  Borg: 13-14  60 minutes  Pelvic Floor Training,  Stretching,  Aerobic Dance,Relaxation exercise,  Strength exercises,  Low impact aerobics,  relaxation | Education: women were given general advice related to ergonomics and daily life activities in pregnancy | 81% attended ≥ 6 group training sessions and performed 2 sets of 8-12 contractions of pelvic floor muscles per day over 12 weeks. Adherence to the training protocol was registered based on the women’s personal training diary and the reports from the physical therapists that led the group training | Data in forest plot |
| LBP | Peterson et al.,  2012, USA,  RCT(22) | E: 22  C-NET (Neuro emotional technique): 20  C-SMT (Spinal manipulative therapy): 15 | E: 28.7 ± 5.1  C-NET: 29.7 ± 5.5  C-SMT: 31.1 ± 4.2 | Exercise: 13/22 exercised daily or weekly.  C-NET: 13/20 exercised daily or weekly.  C-SMT: 9/15 exercised daily or weekly. | Self-reported,  LTPA | Exercise: Study visits once a month until 28 weeks; twice a month until 36 weeks, and weekly thereafter. Exercises: pelvic tilts, pelvic floor, gluteus maximus, latissimus dorsi, and hip adductor strengthening exercises; study participants could enter the study at any point in their pregnancy. Total number of exercise session not the same for every body  C-SMT: Participants in the SMT group were palpated to determine if each had intersegmental dysfunction prior to manipulating. Hypomobile joints were isolated through positioning, then a slow force was applied to preload the joint at the physiological end range. After loading the joint, a high velocity, low amplitude thrust was applied to the isolated joint to move it just past the physiological end range in the side posture position for lumbar and sacroiliac lesions.  C-NET: Neuro Emotional Technique (NET) is a chiropractic mind-body technique that combines desensitization procedures (such as relaxed breathing and visualization) with elements of Five Element Chinese medicine (such as the association of emotions with certain organs or meridians) and chiropractic medicine (the adjustment of the spinal levels that innervate the organ in question) in an attempt to address cognitive distortions through the use of a semantic algorithm | 5x/week  Intensity not reported  75 minutes/week  15 minutes/session  Pelvic Floor Training,  Pelvic tilt exercise, Strength exercises | Education: The booklet instructed exercise participants on recommendations for postural and movement patterns that help alleviate low back pain. Finally, warnings in the booklet about when to stop exercising were reviewed with the participant.  They were also instructed to apply ice. | 23%: Attendance at 8 study visits. But 62% of women who had more than 1 visit reported they did perform their exercise at least 5x/week | Narrative summary  *Roland Morris Disability questionnaire*  Exercise:  baseline - 10.7(4.9);  end - 6.1(5.9)  NET:  baseline - 9.3(3.7);  end - 5.7(4.7)  SMT:  baseline - 8.7(4.1);  end - 4.1(4.3)  *Numeric pain rating scale*  Exercise:  baseline - 3.9(1.5);  end - 2.4(1.8)  NET:  baseline - 3.2(1.4);  end - 2.4(1.6)  SMT:  baseline - 3.5(1.1);  end - 1.9(1.7) |
| LBP | Figueira et al.,  2014, Brazil, RCT(3) | E: 20  C: 20 | E: 24.9 ± 3.9  C: 25.9 ± 4.5 | - | Objective LTPA | Warm-up - dancing; stretching - each exercise repeated 10 times for 10 seconds; cool-down - relaxation exercises. 18 exercise sessions, twice per week (9 weeks of intervention, inclusion in the study between the 20th and 31th week of gestation).  The control groups C1 and C2 (n = 20) attended the service for a conventional treatment’s guidance for low back pain, where the adopted measures were: routine medical advice with medication prescription, resting orientation, counseling and postural guidelines for the treatment of LBP in the clinical prenatal care of the studied Governmental Health Unit. | 2x/week  Scale of Perceived Exertion in flexibility—PERFLEX (0-110): 65-75(prescribed); 72(6)(actual)  90 minutes/week  45 minutes/ session Stretching,  Aerobic Dance, Relaxation exercise | - | 100% compliance; 18/18 sessions attended | Data in forest plot |
| LBP | Foxcroft et al.,  2011, Australia, RCT(4) | E: 25  C: 25 | E: 30.5 ± 4.7  C: 30.0 ± 5.7 | Obesity  (BMI >30.0) | Self-reported,  Total PA | Intervention: individualized exercise program (between the 12th and 36th week of gestation) with an energy expenditure (EE) goal of 900 kcal/ week, individualized exercise program with an energy expenditure (EE) goal of 900 kcal/ week, Women scheduled for 6 face-to-face visits and on average attended 4 (66.7% attended): METh/week: measured at 36 weeks at end of intervention. Measured using the PPAQ | Frequency not reported  E: 9.6 METh/week  C: 2.8 METh/week  Prescribed  E: 900kcal/week  Duration not reported  Various | - | E: 73%: 16/22 met targets of >900 kcal per week at 28 weeks  C: 42%: 8/19 met targets of >900 kcal per week at 28 weeks | LBP - Roland-Morris Disability questionnaire:  Exercisers  12 weeks: 0(0-7); n: 16  36 weeks: 2 (0-24); n:14  Non-Exercisers  12 weeks: 1 (0-15); n: 32  36 weeks: 3 (0-19); n: 21 |
| LBPP | Kluge et al.,  2011, South Africa, RCT(16) | E: 26 C: 24 | E: 27 C: 29 | All women had low back pain at baseline.  Low Back Pain; E: 9 (34.6%) exercised before pregnancy; C: 14 (58.3%) exercised before pregnancy | Objective,  LTPA | Intervention: Women in the study group were also given a handout illustrating and explaining the exercise program. After the first formal exercise class, a training diary was provided in the study group for recording the goal of daily exercise at home. Formal follow-up classes were held every second week for 10 weeks. The exercise classes were led by a biokineticist (with experience in instruction of exercises among pregnant women) and the principal investigator, with classes lasting from 30 to 45 minutes. The 10-week intervention was divided into 3 stages to enable the difficulty of the exercises to increase progressively. (gest weeks at baseline: E: 20(16-24); C: 20(15-24)) | once every two weeks  Intensity not reported  30-45 minutes  Various | Education: In addition to verbal information on basic back care and posture during pregnancy, all participants were given an information pamphlet covering the topic, which included advice on correct posture while sitting and standing, lifting and carrying heavy objects, use of support pillows (especially while sleeping), and methods to turn around in bed or to get up from bed without exerting excessive strain on the lower back. | Compliance with the exercise program was not optimal, despite motivation by the principal investigator. The median number of times women in the study group exercised at home was 37 (range, 3–74 [there were 70 exercise days in the program; some women exercised more than once per day]) and the median number of exercise classes attended was 3 (range, 0–5 [maximum 5]). | Narrative summary  *Pain prevalence*  Baseline  Exercise:  LP: 19(73.1%);  PGP: 1(3.8%);  LP+PGP: 6(23.1%)  Control:  LP: 17(70.8%);  PGP: 2(8.3%);  LP+PGP: 5(20.8%)  *Pain Intensity*  Baseline  Exercise:  30.0(3-47)  Control:  31.0(9-54)  Post Intervention  Exercise:  18.5(0-40)  Control:  33.0(5-50) |
| LBPP | Martins et al.,  2014, Brazil, RCT(10) | E: 30 C: 30 | E: median 26, IQR 24, 30 C: median 23, IQR 17, 29 | All women had lumbopelvic pain at baseline. | Objective, LTPA | Pregnant women from the yoga group participated in 10 supervised Yoga sessions once a week for 1 hour each (inclusion in the study between the 12th and 32th week of gestation). Sessions were administered by one researcher, who is a physical therapist and licensed Hatha yoga instructor. For treatment poses were chosen to stimulate the psychophysical effects, such as joint range of motion, flexibility, strengthening, muscular resistance, and balance, stimulation of introspection, self-confidence, self-control, concentration, and mental relaxation.  Pregnant women in the control postural orientation group received a pamphlet on postural orientation that contained figures and text explaining some possible changes in the curvature of the vertebral spine during pregnancy (hyperlordosis and hyperkyphosis). | 1x/week  Intensity not reported  60 minutes/session  Yoga | - | Presence of women at Yoga Classes  average 5.7  median 6  maximum 10  minimum 2  SD 2.08  variance 4.35 | Data in forest plot |
| LBP  PGP | Granath et al.,  2006, Sweden, RCT(6) | E(land): 134 E(water): 132 | E (land): 29.2 ± 4.5 E (water): 29.1 ±4.5 | - | Objective,  LTPA | Land-based physical exercise (LBPE) was a set of exercises developed by physiotherapists for fitness during pregnancy. They consisted of movements accompanied by music of varying tempos. Focus was on improving aerobic and movement capacity including light jogging, sit-ups, and pelvic mobility exercises. Jumps and heavy loads were avoided. Water aerobics consisted of exercises developed by midwives and physiotherapists for pregnant women. Water aerobics had the same focus on aerobic and movement capacity as LBPE but with considerably less risk for unwanted weight-bearing loading of anatomic structures. The main difference between interventions was the aquatic environments elimination of gravity and dampening resistance to movement. The movements in both interventions targeted similar muscle groups. The intervention started at 11-12 weeks and continued throughout pregnancy. | 1x/week  Intensity not reported  60 minutes/week  Various; light jogging, sit-ups, pelvic mobility exercises; Water Aerobics | women with severe PGP were also offered individual physiotherapy (how many actually received is unknown) | E(land): The women attended an average of 13.5 (range 4-19) sessions in the LBPE group  E(water): 16.2 (range 5-19) in the water aerobics group. | Narrative summary  Post-intervention  Low Back Pain  E(Land): 34  E(water): 19  Post intervention  Pelvic Pain  E(land): 34  E(water): 32 |
| LBP | Kihlstrand et al., 1999, Sweden, RCT(9) | E: 129 C: 128 | >18 years | - | Objective,  LTPA | Intervention: The women were offered supervised water-gymnastics 17–20 times (once a week during the second half of pregnancy). Each training session lasted one hour and included relaxing exercises. All the classes were led by one specially trained midwife. Two different exercise programs were used for all women; one with exercises suitable for earlier pregnancy to be used for the first ten training sessions, and one with exercises suitable for later pregnancy for the last ten sessions. The physical training lasted for 30 minutes followed by 30 minutes of relaxation, all in water and to music adjusted to the different exercises and to relaxation. | 1x/week  Intensity not reported  60 minutes (30 PA; 30 relaxation)  water gymnastics | - | 88% exercised 10-20 times; 55.2% exercised 15-20 times and 32.8% exercised 10-15 times - attendance of water gymnastics training | Narrative summary  During the 31st and between the 33rd and 38th weeks of pregnancy, the water gymnastics group had lower back pain intensity. Data presented in Figure unable to extract. |
| LBP | Field et al., 2013, USA,  RCT(1) | E: 46 C: 46 | E: 24.4 ± 4.7 C: 24.5 ± 5.0 | All women had depression as diagnosed with the Structured Clinical Interview for Depression. | Objective,  LTPA | The women in the yoga group participated in 20-minute sessions once per week for 12 weeks (atarting at 22 weeks of gestation). A trained yoga instructor led group participants through a routine that was specifically designed for women in their second and third trimester of pregnancy. This routine was outlined in a manual and videotaped for DVD demonstrations for the instructor and for the pregnant women. This routine included only basic sitting, kneeling and standing yoga poses as follows: spinal twist, table pose, cat/cow, kneeling balance, kneeling warrior, runner’s stretch, stork pose, tree pose, eagle pose, warrior 1, warrior 2, reverse warrior, side-angle pose, triangle pose, sitting angular pose, cow’s head pose, butterflies and prayer position. | 1x/week  (for 12 weeks) Intensity not reported  20 minutes/week  Yoga | - | Not reported | Data in forest plot |
| LBPP | Gupta, 2014, India,  RCT(15) | E(PT with Stabilizing Exercises): 20  C(PT): 20 | 20-40 | All women had pelvic girdle and low back pain | Objective,  LTPA | E(Physiotherapy plus stabilizing exercises): Lumbar stabilizing exercises; pelvic tilts, bridging, wall squats, quadruped alternate arms/legs raising, + clinical exercises including pelvic floor, stretching, active ROM, strengthening of weak muscles, ordinary physical activities, relaxation+ ergonomic advice; supervised every other day by physical therapist  E(Physiotherapy only): Clinical exercises only - pelvic floor, stretching, active ROM exercises, strengthening exercise, ordinary physical activities, relaxation, ergonomic advice; supervised every other day by physical therapist  56 total prescribed sessions (over a 4-week period) | 14x/week  Intensity and duration not reported  Stabilizing exercises | Clinical exercises (including ergonomic advice) | Not reported | Narrative summary  Numerical Pain Rating Scale Score - Combined (LB and PG)  After interventions  E(PT + stabilizing exercises):  3.75  E(PT):  1.50 |
| LBP | Beyaz et al.,  2011, Turkey, Non RCT Intervention(24) | E: 15  C: 21 | E: 24.5 ± 3.2  C: 25.2 ± 3.5 | women were not sedentary before pregnancy | Objective,  LTPA | Intervention: The eligible pregnant women who were able to maintain exercise program 3 days a week, constituted the exercise group. The pregnant women in the exercise group were recommended to continue breathing and relaxation exercises and to walk at they were already accustomed to from previous exercise sessions target heart rate [(220-age) x0.6] for 30 minutes on the days left from the three-day exercise program until the thirty-seventh weeks of gestation. The sessions were supervised and conducted in groups of 6 pregnant women under the supervision of a physiatrist. First, warm-up work on a bicycle ergometer for 5-10 minutes, then aerobic exercises at the target heart rate ((220-age) x0.6) for 20 minutes and cool-down exercises for 5-10 minutes were applied. Afterwards, posture, stretching, ROM, toning and breathing exercises and Kegel exercises were performed sitting on the floor cushion, then standing and lying on the floor cushion. The sessions were ended after the resting pulse rate turned back through the relaxation exercises performed by lying on one side. The intervention started in the 2nd trimester and continued until the 37th week. | 3x/week  60% HRmax  30-40 minutes  aerobics | Education: counseling on physiological changes in pregnancy, pregnancy-related musculoskeletal functional disorders, prevention of these disorders, ergonomic counseling, proper body mechanics as well as information about nutrition during pregnancy  and preparation towards labor and delivery | Did not record compliance | Narrative summary  In the first assessment, the musculoskeletal system symptoms between the two groups appeared to be similar (p>0.05). Also the findings of locomotor examination were not statistically significant (p>0.05) at the beginning. In the 2nd evaluations, frequency of low back pain was significantly less in the exercise group compared to that of the control group (p<0.001). While severity of low back pain (VAS) decreased in the exercise group between the 1st and 2nd assessments (p<0.001), it increased significantly in the control group (p=0.0001). |
| LBPP | Shim et al., 2007, South Korea, Non RCT Intervention(27) | E: 32  C: 30 | E: 28.1 ± 2.9  C: 28.6 ± 3.2 | women had lumbar and/or posterior pelvic pain at baseline. | Self-reported,  LTPA | 6 sets of exercises: pelvic tilting, knee pull, straight leg raising, curl up, lateral straight leg raises, and the Kegel exercise. 12-week program (inclusion in the study at 17-22 weeks of gestation); Total sessions: 60-84 | 5-7x/week  Intensity and duration not reported  Pelvic Floor Training,  Various | Education:  pamphlet and lecture: regarding simple anatomy and function of the vertebrae, normal pelvic changes that occur during pregnancy, factors related to lumbar and pelvic pain during  pregnancy, and the appropriate body posture to prevent back pain | Not reported | Data in forest plot |
| LBPP | Yan et al., 2014, Taiwan, Non RCT Intervention(26) | E: 51  C: 51 | E: 31.1  C: 29.8 | All women had lower back pain at baseline.  E:18/45 (40%) reported being regularly physically active before pregnancy (accumulating 30 minutes or more of moderate intensity exercise on most days of the week)  C: 16/44 (36.4%) reported being regularly physically active before pregnancy (accumulating 30 minutes or more of moderate intensity exercise on most days of the week) | Self-reported,  LTPA | The antenatal stability ball programs comprised a one-page exercise protocol and 32-minute videotape program. In total, the training program featured 14 stabilization exercises that focused on transversely-oriented abdominals, the lumbar multifidus, and pelvic floor muscles. In a formal study, the principal investigator provided individual guidance twice a week. All members of the experimental group were requested to attend stability ball exercise class at least once a week and practice at home 25–30 minutes two times a week for a period of 12 weeks (inclusion in the study at 17-22 weeks of gestation). To ensure research protocol compliance, a weekly training diary was maintained during the training period. The PI also personally called all participants to ensure their active involvement in the study. | 1-3x/week  Intensity not reported  25-30 minutes  Stabilizing exercises | - | Not reported | Data in forest plot |
| LBP | Dumas et al.,  1995, Canada, Non RCT Intervention (25) | E: 27  C: 36 | E: 28.8 ± 3.6  C: 29.8 ± 3.2 | Sedentary - lifestyle questionnaire | Objective,  LTPA | Supervised intervention: Exercise classes were designed according to the guidelines from Fitness and Amateur Sports Canada. They were held several times a week by qualified instructors with special training in prescribing exercise to pregnant women. Each session lasted 1h and included warm-ups, aerobics, calisthenics, and relaxation exercises. Aerobics consisted of pedalling on a stationary cycle with a power output set to elicit a steady-state pulse rate representing 75% of age-predicted maximal beat rate. The duration was gradually increased from 14 to 25 minutes. Each session included a variety of exercises for increasing abdominal muscle strength such as curl-ups and pelvic tilts, and flexibility and muscular endurance exercises such as hamstring and lower back stretches. Participants were asked to attend at least 3 classes/week until term. Exercise classes started after initial tests but not earlier than 12 weeks (bewteen 17 and 24 weeks of gestation). | 3+/week  75% HR max  60 minutes  Aerobics, calisthenics exercise, relaxation | - | Attendance at exercise classes was 81% of possible classes for the 2nd trimester and 75% for the 3rd trimester | Data in forest plot |
| LBP | Singh et al.,  2008, India,  Non RCT Intervention(28) | 15 | 20-35 | All women had back pain | Objective,  LTPA | Supervised intervention (inclusion in the study between 20 and 32 weeks of gestation): Each patient was educated about the (1) Musculoskeletal changes in pregnancy. (2) Effect of Relaxin hormone on muscles & ligaments in pregnancy. (3) Normal posture & compensation postural changes in pregnancy. (4) Incorporation of bio-mechanical principles in activities of daily living & work place. (5) Exercises to correct & improve posture. Above mentioned education was given to the patient through an education booklet which was in Hindi as well as English Language. During the whole session the caregiver was also present. Under supervision women practiced many of these suggestions e.g. favourable working positions, lifting techniques etc. The session covered the back care related to each individual’s occupation & circumstances. Study period was 3 weeks and a total of 2 sessions of one hour each were given to the patients that included only education and demonstration of assigned exercises | 2 sessions over 3 weeks  Intensity not reported  60 minutes  Exercises to correct & improve posture | Education: Musculo skeletal changes in pregnancy. (2) Effect of Relaxin hormone on muscles & ligaments in pregnancy. (3) Normal posture & compensation postural changes in pregnancy. (4) Incorporation of bio-mechanical principles in activities of  daily living & work place | Not reported | Narrative summary  LBP: 100% (15/15)  VAS scores - mean(SD):  Pre-Test: 5.53(1.88)  Post-Test: 2.87(1.77) |
| PGP | Haakstad et al., 2009, Norway, Cohort(31) | E: 50  C: 417 | E: 31.2 ± 3.9  C: 31.6 ± 4.0 | E: 40 (80%) active before pregnancy  C: 77 (18.5%) active before pregnancy | Self-reported,  LTPA | E: Participating in regular exercise in the third trimester was defined as: performing moderate intensity leisure-time physical activity >3x/week  E(2): This group performed PFMT (81/384 that completed questionnaire about strength training). The women were asked whether they engaged in regular strength training on their own greater than or equal to once a week. If they answered yes to that question, they were asked to further specify if they performed exercise for the abdominals, back, or pelvic floor muscles. The question about performance of PFMT was: “Do you exercise the pelvic floor muscles (muscles around the urethra, vagina and rectum)?”. The same question was asked retrospectively for prepregnancy PFMT and training during first and second trimesters.  Exercise frequency (moderate intensity leisure-time physical activity >= 20 minutes) was categorized into six groups: seldom or never, once per week, 2–3 times per week, 4–5 times per week, 6 times per week and every day or more than once every day. Participating in regular exercise in the third trimester was defined as: performing moderate intensity leisure-time physical activity >3 times a week. Overall, 19% of the women (n = 467) reported to have become more physically active in the third trimester compared to pre-gestational exercise levels.  Seven percent reported that they had performed PFMT at least once a week before pregnancy. During trimesters 1, 2, and 3, the proportions were 12.9, 17.6, and 17.4%, respectively  - 1st trimester: 19.3% <=1x/week, 39.6% 2-3x/week, 14.8% >=4x/week; 10.9% <30 minutes, 47.8% 30-60 minutes, 15.2% >60 minutes; 23.3% low intensity (no sweating and normal breathing), 40.0% moderate intensity (modestly sweating and light breathing), 10.3% high intensity (sweating and breathing heavily)  -2nd trimester: 24.6% <=1x/week, 30.4% 2-3x/week, 15.2% >=4x/week; 17.3% <30 minutes, 41.3% 30-60 minutes, 10.7% >60 minutes; 33.6% low intensity (no sweating and normal breathing), 34.0% moderate intensity (modestly sweating and light breathing), 3.0% high intensity (sweating and breathing heavily)  -3rd trimester: 26.3% <=1x/week, 24.8% 2-3x/week, 10.6% >=4x/week; 24.4% <30 minutes, 31.5% 30-60 minutes, 6.4% >60 minutes; 44.8% low intensity (no sweating and normal breathing), 18.0% moderate intensity (modestly sweating and light breathing), 1.3% high intensity (sweating and breathing heavily) | Frequency, intensity and duration not reported  Pelvic Floor Training | - | - | Data in forest plot |
| LBP  PGP | Gjestland et al., 2013, Norway, Cohort(30) | 3482 | 31.1 ± 4.8 | - | Self-reported,  LTPA | Only 14.5% of women followed the current exercise prescription of 3 or more times a week for > 20 minutes at moderate intensity; Participants grouped by frequency of exercise: <1x/week n=1090; 1-2x/week n=1466; >3x/week n=926 based on questionnaires. | Frequency, intensity and duration not reported  Various | - | - | Narrative summary  Lower back pain during pregnancy  Exercise 1-2/week: OR=0.80(95% CI 0.66-0.97)  Exercise 3+/week: OR=0.82(95% CI 0.68-1.02)  Pelvic girdle pain during pregnancy Exercise 1-2/week: OR=0.88  (95% CI 0.72-1.07)  Exercise 3+/week: OR=0.76  (95% CI 0.61-0.96)" |
| LBP | Chang et al.,  2014, Taiwan, Cohort(29) | 214 | - | - | Self-reported,  LTPA | Participants filled out questionnaires at 28 weeks +/- 2 weeks; at 32 weeks +/- 2 weeks; at 36 weeks +/- 2 weeks; completed Physical Workload Questionnaire | Frequency, intensity, duration and type not reported | - | 83.6%: 179 women completed all measures | Narrative summary  Mann-Whitney U values for correlation between regular exercise and back pain intensity at 28 weeks gestation (n=214): -1.37 |
| PGP | Andersen et al., 2015, Denmark, Case-control(32) | Pelvic pain: n=2482;  no pelvic pain n=2822 | - | - | Self-reported,  LTPA | Grouped by pelvic pain not physical activity | Frequency, intensity, duration not reported  Various | - | - | Narrative summary  Pelvic girdle pain during pregnancy (OVERALL):  Exercise: >0-≤1 hrs/week: OR=0.88 (95% CI 0.74-1.04)  Exercise: >1-≤2 hrs/week: OR=0.87 (95% CI 0.72-1.07)  Exercise: >2-≤3 hrs/week: OR=0.94 (95% CI 0.72-1.23)  Exercise: >3-≤5 hrs/week: OR=0.78 (95% CI 0.58-1.04)  Exercise: >5 hrs/week: OR=0.83 (95% CI 0.55-1.26)  Exercise: Low IMPACT (aerobic, aerobic for pregnant women, dancing, walking/hiking): OR=0.89 (95% CI 0.74-1.07)  Exercise: bicycling: OR=0.95 (95% CI 0.76-1.17)  Exercise: yes to the question ‘Do you get any kind of exercise during pregnancy?': OR=0.87 (95% CI 0.77-0.99)  Exercise: swimming: OR=0.73 (95% CI 0.58-0.91)  Exercise: Resistance training only: OR=1.81 (95% CI 1.15-2.83)  Exercise: HIGH IMPACT: OR=0.71 (95% CI 0.48-1.06) |
|  |  |  |  |  |  |  |  |  |  |  |

**Abbreviations:** LTPA: leisure time physical activity; LBP: low back pain; PGP: pelvic girdle pain; LBPP: lumbopelvic pain; RCT: randomized control trial; E: exercise; C: control; HR: hear rate; bpm: beat per minute; PFMT: pelvic floor muscle training; SD: standard deviation; ROM: range of motion; VAS: visual analog scale; OR: odd ratio; CI: confidence interval; IQR: interquartile range.

**Supplemental Table 2**: Association between prenatal exercise and maternal low back pain, pelvic girdle pain and lumbopelvic pain prevalence and severity during pregnancy.

| **Quality assessment** | | | | | | | **№ of participants** | | **Effect** | | **Quality of evidence** | **Importance** |
| --- | --- | --- | --- | --- | --- | --- | --- | --- | --- | --- | --- | --- |
| **№ of studies** | **Study design** | **Risk of bias** | **Inconsistency** | **Indirectness** | **Imprecision** | **Other considerations** | **Exercise** | **No exercise** | **Relative (95% CI)** | **Absolute (95% CI)** |
| Association between prenatal exercise (exercise-only interventions and exercise + co-interventions) and low back, pelvic or lumbopelvic pain during pregnancy | | | | | | | | | | | | |
| 13 (pooled estimate of effect, n=12; 1 study reported narratively)a | randomized trials | serious b | not serious | serious c | serious d | none | 645/1023 (63.0%) | 634/964 (65.8%) | **OR 0.78** (0.60 to 1.02) | **58 fewer per 1 000** (from 4 more to 122 fewer) | ⨁◯◯◯ VERY LOW | IMPORTANT |
| Narrative summary: Granath (2006) randomized women to water-based exercise (n=132) or land-based exercise (n=134). Women in the water-based exercise group reported less cases of LBP (p=0.04) whereas the rate of PGP did not differ between the groups (data not provided). | | | |
| Sensitivity analysis: Association between exercise-only interventions and low back, pelvic or lumbopelvic pain during pregnancy | | | | | | | | | | | | |
| 7 (pooled estimate of effect, n =6; 1 study reported narratively)a | randomized trials | very serious e | serious f | not serious | serious d | none | 84/167 (50.3%) | 106/176 (60.2%) | **OR 0.51** (0.22 to 1.16) | **167 fewer per 1 000** (from 35 more to 352 fewer) | ⨁◯◯◯ VERY LOW | IMPORTANT |
| Narrative summary: Granath (2006) randomized women to water-based exercise (n=132) or land-based exercise (n=134). Women in the water-based exercise group reported less cases of LBP (p=0.04) whereas the rate of PGP did not differ between the groups (data not provided). | | | |
| Sensitivity analysis: Association between exercise + co-interventions and low back, pelvic and lumbopelvic pain during pregnancy | | | | | | | | | | | | |
| 6 g | randomized trials | serious b | not serious | serious c | serious d | none | 561/856 (65.5%) | 528/788 (67.0%) | **OR 0.85** (0.68 to 1.06) | **37 fewer per 1 000** (from 13 more to 90 fewer) | ⨁◯◯◯ VERY LOW | IMPORTANT |
| Evidence from non-randomized interventions: Association between exercise-only interventions and low back pain during pregnancy | | | | | | | | | | | | |
| 1 | observational studies h | very serious i | serious j | not serious | not serious k | none | 23/27 (85.2%) | 33/38 (86.8%) | **OR 0.87** (0.21 to 3.60) | **17 fewer per 1 000** (from 91 more to 288 fewer) | ⨁◯◯◯ VERY LOW | IMPORTANT |
| Evidence from cohort studies: Association between prenatal exercise and low back pain during pregnancy | | | | | | | | | | | | |
| 1 l | observational studies m | not serious n | serious j | not serious | not serious k | none | Narrative summary: Gjestland (2013) reported a decreased odd of suffering from LBP (n=3482) in late pregnancy (week 32) when exercise was performed once to twice a week compared to once a week or less (OR 0.8, 95% CI 0.66-0.97, p<0.05). | | | | ⨁◯◯◯ VERY LOW | IMPORTANT |
| Evidence from cohort studies: Association between prenatal exercise and pelvic girdle pain during pregnancy | | | | | | | | | | | | |
| 2 (pooled estimate of effect, n =1; 1 study reported narratively) l | observational studies m | very serious o | serious j | not serious | not serious k | none | 52/81 (64.2%) | 136/262 (51.9%) | **OR 1.66** (0.99 to 2.78) | **123 more per 1 000** (from 3 fewer to 231 more) | ⨁◯◯◯ VERY LOW | IMPORTANT |
| Narrative summary: Gjestland (2013) reported a decreased odd of suffering from PGP (n=3482) in late pregnancy (week 32) when exercise was performed at least three times per week compared to once a week or less (OR 0.76 95% CI 0.61-0.96). | | | |
| Association between prenatal exercise (exercise-only interventions and exercise+co-interventions) and the severity of low back, pelvic and lumbopelvic pain during pregnancy | | | | | | | | | | | | |
| 14 (pooled estimate of effect, n =10; 4 studies synthesized narratively)p | randomized trials | very serious q | serious f | serious | not serious | none | 389 | 395 | - | SMD **1.03 SD lower** (1.58 lower to 0.48 lower) | ⨁◯◯◯ VERY LOW | IMPORTANT |
| Narrative synthesis: Peterson (2012) reported that exercises (n=22) decreased LBP symptoms severity similarly to neuro-emotional technique (n=20) and spinal manipulative therapy (n=15). Kluge (2011) reported that exercise (n=26) decreased LBPP symptoms severity compared to a control group (n=24). Gupta (2012) reported improvement in LBPP symptoms with exercise and physiotherapy (n=20) compared to physiotherapy alone (n=20). Kilhstrand (1999) reported that exercises (n=129) reduced LBP pain intensity (no statistics provided) compared to a control group (n=128). | | | |
| Sensitivity analysis: Association between exercise-only interventions and the severity of low back pain during pregnancy | | | | | | | | | | | | |
| 8 (pooled estimate of effect, n =7; 1 study reported narratively)l | randomized trials | very serious r | serious f | not serious | not serious | none | 271 | 281 | - | SMD **1.43 SD lower** (2.29 lower to 0.58 lower) | ⨁◯◯◯ VERY LOW | IMPORTANT |
| Narrative summary: Kilhstrand (1999) reported that 30 minutes of water aerobics (n=129) performed once a week in the second half of pregnancy reduced LBP average weekly pain intensity during the 31st and between the 33rd and the 38th weeks of gestation compared to a control group (n=128). | | | |
| Sensitivity analysis: Association between exercise + co-interventions and the severity of low back, pelvic and lumbopelvic pain during pregnancy | | | | | | | | | | | | |
| 6 (pooled estimate of effect, n =3; 3 studies synthesized narratively)s | randomized trials | serious t | serious f | serious c | serious d | none | 118 | 114 | - | SMD 0.45 SD lower (0.94 lower to 0.03 higher) | ⨁◯◯◯ VERY LOW | IMPORTANT |
| Narrative synthesis: Peterson (2012) reported that exercises (n=22) decreased LBP symptoms severity similarly to neuro-emotional technique (n=20) and spinal manipulative therapy (n=15). Kluge (2011) reported that combined Kluge (2011) reported that exercise (n=26) decreased LBPP symptoms severity compared to a control group (n=24). Gupta (2012) reported improvement in LBPP symptoms with exercise and physiotherapy (n=20) compared to physiotherapy alone (n=20). | | | |
| Evidence from non-randomized interventions: Association between exercise-only interventions and the severity of low back pain during pregnancy | | | | | | | | | | | | |
| 1 | observational studies h | serious u | serious j | not serious | not serious k | none | 45 | 44 | - | MD 9.57 lower (11.3 lower to 7.84 lower) | ⨁◯◯◯ VERY LOW | IMPORTANT |
| Evidence from non-randomized interventions: Associaton between exercise + co-interventions and the severity of low back pain during pregnancy | | | | | | | | | | | | |
| 3 (pooled estimate of effect, n =1; 2 studies synthesized narratively)v | observational studies h | very serious w | serious j | serious c | not serious k | none | 29 | 27 | - | SMD 1.46 lower (2.7 lower to 0.22 lower) | ⨁◯◯◯ VERY LOW | IMPORTANT |
| Narrative synthesis: Beyaz (2011) reported that at least three 30-minute sessions of aerobics per week (n=15) from the second trimester until the 37th week of pregnancy decreased LBP intensity (p<.001) compared to a control group (n=21). Singh (2008) reported that two short education and exercise demonstration sessions aimed to correct and improve posture (n=15) decreased LBP intensity after a 3-week intervention period (mean scores difference -2.7/10, p<0.05). | | | |
| Evidence from cohort studies: Association between prenatal exercise and the severity of low back pain during pregnancy | | | | | | | | | | | | |
| 1 l | observational studies m | serious x | serious j | not serious | not serious k | none | Narrative summary: Chang (2014) reported that performing regular exercise in the 3rd trimester (n=214) was not predictive of changes in average LBP intensity (Mann-Whitney U -1.37 p>0.05) | | | | ⨁◯◯◯ VERY LOW |  |

**CI:** Confidence interval; **OR:** Odds ratio; **SMD:** Standardised mean difference; **MD:** Mean difference; **LBP**: Low back pain; **PGP**: Pelvic girdle pain; **LBPP**: Lumbopelvic pain

#### Explanations

a. One superiority trial could not be included in the pooled estimate due to the absence of a no-exercise control group; results are reported narratively

b. Serious risk of bias. High risk of performance bias.

c. Serious indirectness because exercise was combined to a co-intervention.

d. Serious risk of imprecision. The 95% CI crosses the line of no effect, and is wide, such that interpretation of the data would be different if the true effect were at one end of the CI or the other.

e. Very serious risk of bias. High risk of selection bias (inappropriate or unclear randomization and/or concealment procedure), detection bias (potentially flawed measurement of outcome), attrition bias, and other bias.

f. Serious inconsistency due to high heterogeneity (I2≥50%).

g. One study reported 100% case of pelvic girdle pain (not estimable result) and is not included in the pooled analysis.

h. Non-randomized interventions

i. Very serious risk of bias. High risk of bias detected for all categories (selection bias, performance bias, detection bias, attrition bias, reporting bias, and other bias).

j. Serious inconsistency because only one study.

k. No serious imprecision; only one study but already downgraded for serious inconsistency for this reason.

l. One study could not be included in the pooled estimate due to incomplete reporting of data; results are reported narratively.

m. Cohort study

n. No serious risk of bias. Reporting bias was an issue for one study (incomplete reporting of data such that it could not be included in the meta-analysis; results are reported narratively [Gjestland, 2013]).

o. Very serious risk of bias. High risk of detection bias (potentially flawed measurement of outcome measure and exposure to physical activity); attrition bias (high attrition rate (>10%)). Reporting bias was an issue for one study (incomplete reporting of data such that it could not be included in the meta-analysis; results are reported narratively [Gjestland, 2013]).

p. Four studies could not be included in the pooled estimate due to absence of a no-exercise control group or incomplete reporting of data; results are reported narratively.

q. Very serious risk of bias. High risk of selection bias (either unclear or inappropriate randomization and/or concealment procedure); detection bias (potentially flawed measurement of outcome); attrition bias and performance bias. Reporting bias was an issue in two studies (incomplete reporting of data such that it could not be included in the meta-analysis; results are reported narratively [Kluge, 2011; Kilhstrand, 1999]).

r. Very serious risk of bias. High risk of selection bias (either unclear or inappropriate randomization and/or concealment procedure); detection bias (potentially flawed measurement of outcome); attrition bias and performance bias. Reporting bias was an issue in one study (incomplete reporting of data such that it could not be included in the meta-analysis; results are reported narratively [Kilhstrand, 1999]).

s. Three studies could not be included in the pooled estimate due to absence of a no-exercise control group or incomplete reporting of data; results are reported narratively.

t. Serious risk of bias. High risk of performance bias and detection bias (potentially flawed measurement of outcome). Reporting bias was an issue in one study (incomplete reporting of data in such that it could not be included in the meta-analysis; results are reported narratively [Kluge, 2011]).

u. Serious risk of bias. High risk of detection bias (potentially flawed measurement of outcome) and attrition bias.

v. Two studies could not be included in the pooled estimate due to absence of a no-exercise control group or incomplete reporting of data; results are reported narratively.

w. Serious risk of bias. High risk of performance bias; detection bias (no blinding of outcome assessors and potentially flawed measurement of outcome) and attrition bias. Reporting bias was an issue in one study (incomplete reporting of data such that it could not be included in the meta-analysis; results are reported narratively [Beyaz, 2011]).

x. Serious risk of bias. High risk of performance bias and attrition bias. Reporting was an issue in one study (incomplete reporting of data such that it could not be included in the meta-analysis; results are reported narratively [Chang, 2014]).

**Supplemental Table 3**. Association between prenatal exercise and maternal low back pain, pelvic girdle pain and lumbopelvic pain prevalence and severity during postpartum.

| **Certainty assessment** | | | | | | | **№ of participants** | | **Effect** | | **Certainty** | **Importance** |
| --- | --- | --- | --- | --- | --- | --- | --- | --- | --- | --- | --- | --- |
| **№ of studies** | **Study design** | **Risk of bias** | **Inconsistency** | **Indirectness** | **Imprecision** | **Other considerations** | **Exercise** | **No exercise** | **Relative (95% CI)** | **Absolute (95% CI)** |
| Association between prenatal exercise (exercise-only and exercise + co-interventions) and low back, pelvic and lumbopelvic pain during postpartum | | | | | | | | | | | | |
| 3 | randomized trials | not serious | not serious | serious | serious a | none | 91/254 (35.8%) | 88/237 (37.1%) | **OR 0.89** (0.51 to 1.56) | **27 fewer per 1 000** (from 108 more to 140 fewer) | ⨁⨁◯◯ LOW | IMPORTANT |
| Sensitivity analysis: Association between exercise-only interventions and low back, pelvic and lumbopelvic pain during postpartum | | | | | | | | | | | | |
| 1 | randomized trials | not serious | serious b | not serious | not serious c | none | 7/44 (15.9%) | 10/48 (20.8%) | **OR 0.75** (0.19 to 2.94) | **43 fewer per 1 000** (from 161 fewer to 228 more) | ⨁⨁⨁◯ MODERATE | IMPORTANT |
| Sensitivity analysis: Association between exercise+co-interventions and low back, pelvic and lumbopelvic pain during postpartum | | | | | | | | | | | | |
| 2 | randomized trials | not serious | not serious | serious d | serious a | none | 84/210 (40.0%) | 78/189 (41.3%) | **OR 1.01** (0.47 to 2.18) | **2 more per 1 000** (from 164 fewer to 192 more) | ⨁⨁◯◯ LOW | IMPORTANT |
| Evidence from non-randomized interventions: Association between exercise-only interventions and low back pain during postpartum | | | | | | | | | | | | |
| 1 | observational studies e | very serious f | serious b | not serious | not serious c | none | 23/27 (85.2%) | 31/38 (81.6%) | **OR 1.30** (0.34 to 4.97) | **36 more per 1 000** (from 141 more to 215 fewer) | ⨁◯◯◯ VERY LOW | IMPORTANT |
| Evidence from case-control studies: Association between prenatal exercise and pelvic girdle pain during postpartum | | | | | | | | | | | | |
| 1 g | observational studies h | very serious i | serious b | not serious | not serious c | none | Narrative summary: Anderson (2015) reported that being physically active during pregnancy (n=5304) decreased the odds of PGP at 6 months postpartum (OR 0.87 95%CI 0.77-0.99 p=0.028) | | | | ⨁◯◯◯ VERY LOW | IMPORTANT |
| Association between exercise-only interventions and the severity of low back pain during postpartum | | | | | | | | | | | | |
| 1 g | randomized trials | serious j | serious b | not serious | not serious c | none | Narrative summary: Kihlstrand (1999) reported that 30 minutes of water aerobics performed once a week (n=129) in the second half of pregnancy reduced LBP intensity in the first week postpartum (p=0.034) compared to a control group (n=128). | | | | ⨁⨁◯◯ LOW | IMPORTANT |

**CI:** Confidence interval; **OR:** Odds ratio

#### Explanations

a. Serious risk of imprecision. The 95% CI crosses the line of no effect, and is wide, such that interpretation of the data would be different if the true effect were at one end of the CI or the other.

b. Serious inconsistency because only one study.

c. No serious imprecision; only one study but already downgraded for serious inconsistency for this reason.

d. Serious indirectness because exercise was combined to a co-intervention.

e. Non-randomized interventions

f. Very serious risk of bias. High risk of bias detected for all categories (selection bias, performance bias, detection bias, attrition bias, reporting bias and other bias).

g. One study could not be included in the pooled estimate due to incomplete reporting of data; results are reported narratively.

h. Case-control study

i. Very serious risk of bias. High risk of performance bias (potentially flawed measurement of exposure; unknown validity of physical activity measure), detection bias (potentially flawed measurement of outcome), and reporting bias (incomplete reporting of data such that it could not be included in the meta-analysis; results are reported narratively).

j. Serious risk of bias. High risk of performance bias, detection bias (no blinding of outcome assessors), attrition bias and reporting bias (incomplete reporting of data such that it could not be included in the meta-analysis; results are rported narratively).

**3) Supplementary figures**


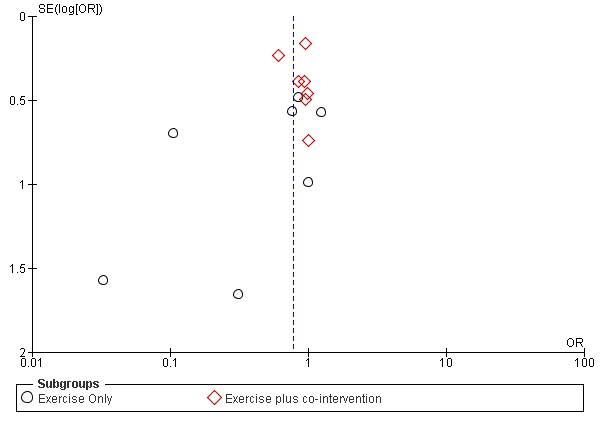


Online Supplemental Figure 1. Funnel plot of the meta-analysis of published prenatal exercise-only and exercise + co-interventions on risk of maternal low back, pelvic girdle, and lumbopelvic pain during pregnancy (RCTs). Each plotted points represents the standard error and odds ratio between intervention and control group for a single study. The vertical line represents the average odds ratio of 0.78 found in the meta-analysis.


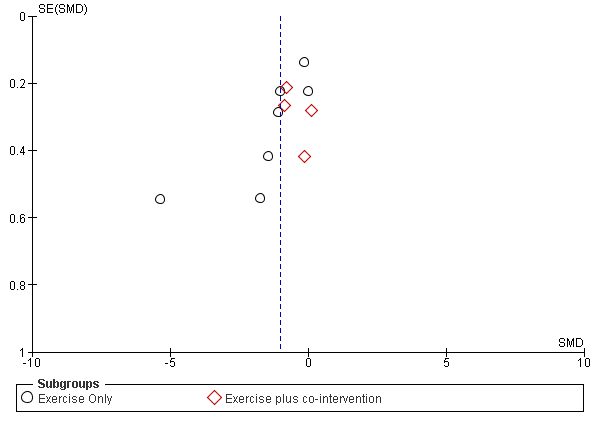


Online Supplemental Figure 2. Funnel plot of the meta-analysis of published prenatal exercise-only and exercise + co-interventions on severity of maternal low back, pelvic girdle, and lumbopelvic pain during pregnancy (RCTs). Each plotted points represents the standard error and standardized mean difference between intervention and control group for a single study. The vertical line represents the average standardized mean difference of -1.03 found in the meta-analysis.


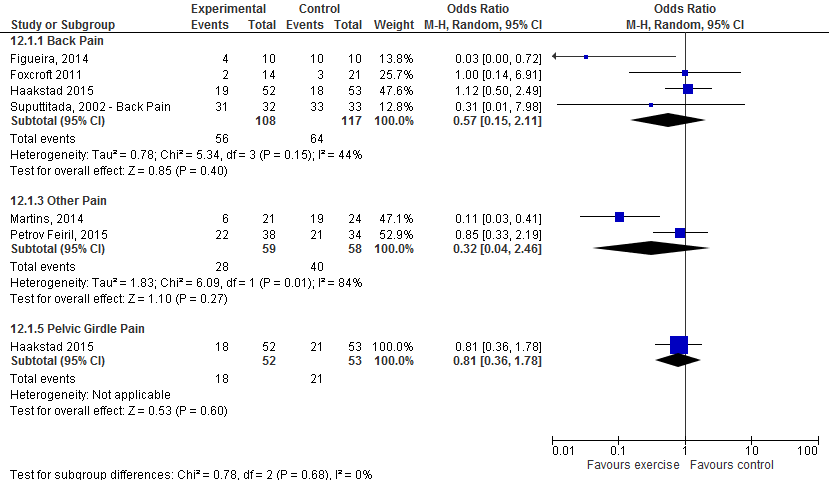


Online Supplemental Figure 3*.* Effects of prenatal exercise compared with control on odds of low back pain, pelvic girdle pain and mixed pain presentation (pain presentation not clearly defined by the authors) during pregnancy (**RCTs**). Subgroup analyses were conducted with studies including exercise-only interventions. Analyses were conducted using a random effects model. CI, confidence interval; df, degrees of freedom; M-H, Mantel-Haenszel method.


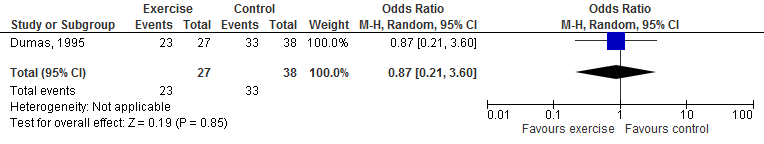


Online Supplemental Figure 4. Effects of prenatal exercise-only intervention compared with control on odds of low back pain during pregnancy (**non-randomized intervention**). Analyses were conducted using a random effects model. CI, confidence interval; df, degrees of freedom; M-H, Mantel-Haenszel method.


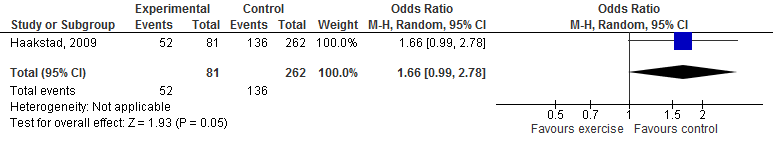


Online Supplemental Figure 5. Effects of prenatal exercise-only intervention compared with control on odds of pelvic girdle pain during pregnancy (**cohort study**). Analyses were conducted using a random effects model. CI, confidence interval; df, degrees of freedom; M-H, Mantel-Haenszel method.

**
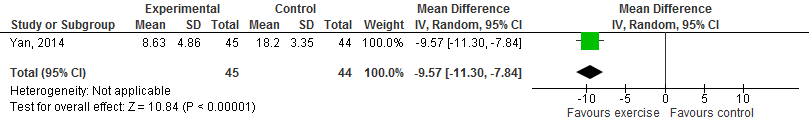
**

Online Supplemental Figure 6. Effects of prenatal exercise-only intervention compared with control on severity of low back pain during pregnancy (**non-randomized intervention**). Analyses were conducted using a random effects model. CI, confidence interval; df, degrees of freedom; M-H, Mantel-Haenszel method.


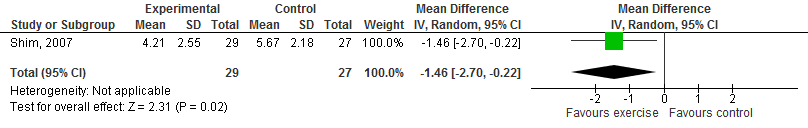


Online Supplemental Figure 7*.* Effects of prenatal exercise + co-intervention compared with control on the severity of low back pain during pregnancy (**non-randomized intervention**). Analyses were conducted using a random effects model. CI, confidence interval; df, degrees of freedom; M-H, Mantel-Haenszel method.

**
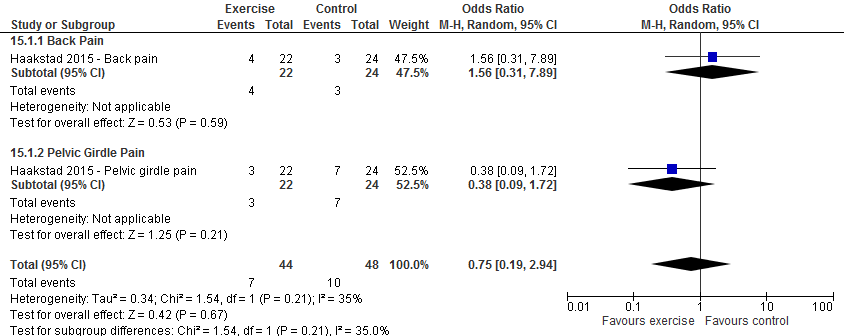
**

Online Supplemental Figure 8. Effects of prenatal exercise compared with control on odds of postpartum low back pain, and pelvic girdle pain (**RCTs**). Subgroup analyses were conducted with studies including “exercise-only” interventions. Analyses were conducted using a random effects model. CI, confidence interval; df, degrees of freedom; M-H, Mantel-Haenszel method.

**
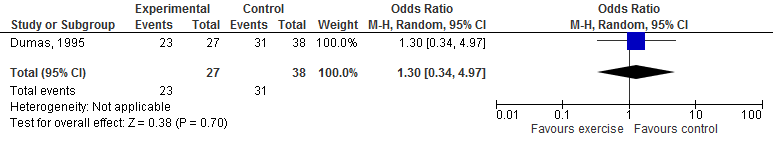
**

Online Supplemental Figure 9. Effects of prenatal exercise-only intervention compared with control on odds of postpartum low back pain (**non-randomized intervention**). Analyses were conducted using a random effects model. CI, confidence interval; df, degrees of freedom; M-H, Mantel-Haenszel method.

**4) Search strategies**

The following databases were searched on January 6th, 2017:

- Ovid MEDLINE(R) In-Process & Other Non-Indexed Citations, Ovid MEDLINE(R) Daily and Ovid MEDLINE(R)
- Ovid EMBASE
- Ovid All EBM [Evidence-Based Medicine] Reviews: Cochrane Database of Systematic and Cochrane Central Register of Controlled Trials
- Ovid PsycInfo 1806-Present
- EBSCO CINAHL Plus with Full-text, 1937-Present
- EBSCO Sport Discus with Full-text. 1975-Present
- EBSCO ERIC, 1966-Present
- EBSCO Child Development and Adolescent Studies, 1927-Present
- Scopus, 1960-Present
- Web of Science Core Collection (including Emerging Sources Citation Index) , 1900-Present
- Clinicaltrials.gov

*Maternal Outcomes Strategy*

MEDLINE

1. exp Exercise/ or Athletes/ or exp Exercise Movement Techniques/ or Physical Exertion/ or exp Exercise Therapy/ or exp Sports/ or Motor Activity/ or Sedentary Lifestyle/ or (exercise or physical* activ* or strenuous activit* or physical* inactiv* or sedentary or running or plyometric* or yoga or tai chi or weight training or resistance training or swim* or sport* or athlet* or walk or walking or mvpa or ltpa or stretching or aerobic capacity).ti,kf. or exercise.ab. /freq=2 or physical* activ*.ab. /freq=2 or (weight* adj2 lift*).ti,kf. or ((muscle or muscular or strength*) adj2 conditioning).ti,kf.

2. exp Pregnancy Complications/ or Pregnancy Outcome/ or exp Labor, Obstetric/ or exp Delivery, Obstetric/ or exp Extraction, Obstetrical/ or pregnan*.ti,hw,kf.

3. ((birth or pregnancy or childbirth) adj3 (outcome* or complication*)).mp.

4. (((spontaneous or induc* or onset or length) adj3 (labor or labour)) or c?esarean).mp.

5. (episiotom* or vaginal delivery or gestational diabetes or pre-eclampsia or preeclampsia or gestosis).mp.

6. (((normal or instrumental or assisted) adj2 (delivery or birth or childbirth)) or (forceps or ventouse or vacuum extraction)).mp.

7. ((mode of delivery or type of delivery) and (pregnan* or birth or childbirth or obstetric* or labor or labour)).mp.

8. ((tear* or ruptur* or hemorrhage*) adj2 (placent* or vagin* or membran* or periton*)).mp.

9. (miscarriage* or spontaneous abortion*).mp.

10. or/2-9

11. 1 and 10

12. Pregnancy/ or pregnan*.ti,hw,kf. or exp Pregnancy Trimesters/ or Peripartum Period/ or Postpartum Period/ or (antenatal or prenatal or perinatal or postnatal or prepartum or antepartum or postpartum or pre partum or ante partum or post partum or puerper* or primigravid* or primiparous or multiparous or nulliparous or multigravid* or trimester* or obstetric*).ti,kf.

13. 1 and 12

14. ((pregnan* or antenatal or prenatal or perinatal or postnatal or prepartum or antepartum or postpartum or pre partum or ante partum or post partum or puerper*) adj5 (exercise or physical* activ* or strenuous activit* or physical inactiv* or sedentary or running or plyometric* or yoga or tai chi or weight training or resistance training or (weight* adj2 lift*) or swim* or sport* or athlet* or walk or walking or ((muscle or muscular or strength*) adj2 conditioning))).ab.

15. 13 or 14

16. exp Insulins/ or diabetes mellitus/ or exp diabetes mellitus, type 1/ or exp diabetes mellitus, type 2/ or diabetes, gestational/ or prediabetic state/ or hemoglobin a, glycosylated/ or (insulin or glucose or glyc?emic control or blood sugar or diabet* or prediabet* or hba1c or glycosylated h?emoglobin or hyperglyc?emi* or hypoglyc?emi* or (weight adj3 (gain* or change* or loss or lose or retention)) or bmi or body mass index or body composition or skinfold thickness or ((hip or waist) adj2 ratio) or ((waist or abdominal) adj2 circumference) or overweight or obes* or adipos* or underweight or normal weight or healthy weight or hypertension or hypotension or fainting or syncope or lightheaded* or light headed* or dizziness or blood pressure or tox?emi* or eph complex or proteinuria or edema or hemodynamic* or haemodynamic* or systolic or diastolic or cardiovascular or cardiometabolic or cardio-metabolic or metabolic or heart or cardio* or cardiac or lipid* or placental growth factor* or triglyceride* or ldl or hdl or lipoprotein or cholesterol).mp.

17. dehydration/ or exp Cardiovascular Diseases/ or (dehydrat* or heart disease* or cardiovascular disease*).mp.

18. adaptation, physiological/ or body temperature regulation/

19. Physical Fitness/ or exp Physical Endurance/ or me.fs. or (safe* or harm* or risk* or fitness or aerobic capacity or oxygen consumption or vo2 max or vo2max or vo2 peak or vo2peak or frequency or intensity or duration or dose response or fitt or zone or (type* adj2 exercise)).mp.

20. exp Chronic disease/ or exp Osteoporosis/ or exp Urinary Incontinence/ or (chronic disease* or chronic illness* or osteoporosis or incontinen*).mp.

21. exp Back Pain/ or Pelvic Pain/ or Muscle Cramp/ or (Pain/ and exp Hip Joint/) or ((hip or back or pelvic or pelvis) adj3 (pain or discomfort or ache)).mp. or cramp*.mp.

22. Mental Health/ or exp Mental Disorders/ or Body Image/ or Self Concept/ or (mental health or mental disorder* or mental illness* or mental disease* or depression or depressive or mood or anxiety or well being or wellbeing or wellness or body image or self perception).mp.

23. (postur* or supine or valsalva or diastasis recti or rectus abdominis or inter rectus distance or interrectus distance).mp.

24. Fatigue/ or (fatigue or exhaustion or injur* or trauma).mp.

25. or/16-24

26. 15 and 25

27. 11 or 26

28. limit 27 to medline

29. animals/ not (animals/ and humans/)

30. 28 not 29

31. 27 not 28

32. ((rat or rats or mouse or mice or cow or cows or bovine or sheep or ewe*) not ((rat or rats or mouse or mice or cow or cows or bovine or sheep or ewe*) and (human* or women))).ti,ab,kf.

33. 31 not 32

34. 30 or 33

35. remove duplicates from 34

EMBASE

1. exp *exercise/ or *athlete/ or exp *kinesiotherapy/ or exp *sport/ or exp *physical activity/ or *sedentary lifestyle/ or (exercise or physical* activ* or physical* inactiv* or sedentary or running or plyometric* or yoga or tai chi or weight training or resistance training or swim* or sport* or athlet* or walk or walking or mvpa or ltpa or stretching or aerobic capacity).ti,kw. or exercise.ab. /freq=2 or physical* activ*.ab. /freq=2 or (weight* adj2 lift*).ti,kw. or ((muscle or muscular or strength*) adj2 conditioning).ti,kw.

2. exp pregnancy complication/ or pregnancy outcome/ or exp labor/ or exp delivery/ or pregnan*.ti,kw.

3. ((birth or pregnancy or childbirth) adj3 (outcome* or complication*)).mp.

4. (((spontaneous or induc* or onset or length) adj3 (labor or labour)) or c?esarean).mp.

5. (episiotom* or vaginal delivery or gestational diabetes or pre-eclampsia or preeclampsia or gestosis).mp.

6. (((normal or instrumental or assisted) adj2 (delivery or birth or childbirth)) or (forceps or ventouse or vacuum extraction)).mp.

7. ((mode of delivery or type of delivery) and (pregnan* or birth or childbirth or obstetric* or labor or labour)).mp.

8. ((tear* or ruptur* or hemorrhage*) adj2 (placent* or vagin* or membran* or periton*)).mp.

9. (miscarriage* or spontaneous abortion*).mp.

10. or/2-9

11. 1 and 10

12. Pregnancy/ or pregnan*.ti,hw,kw. or exp Pregnancy Trimesters/ or Peripartum Period/ or Postpartum Period/ or (antenatal or prenatal or perinatal or postnatal or prepartum or antepartum or postpartum or pre partum or ante partum or post partum or puerper* or primigravid* or primiparous or multiparous or nulliparous or multigravid* or trimester* or obstetric*).ti,kw.

13. 1 and 12

14. ((pregnan* or maternal or antenatal or prenatal or perinatal or postnatal or prepartum or antepartum or postpartum or pre partum or ante partum or post partum or puerper*) adj5 (exercise or physical* activ* or strenuous activit* or physical* inactiv* or sedentary or running or plyometric* or yoga or tai chi or weight training or resistance training or (weight* adj2 lift*) or swim* or sport* or athlet* or walk or walking or mvpa or ltpa or stretching or aerobic capacity or fitness or ((muscle or muscular or strength*) adj2 conditioning))).ab.

15. 13 or 14

16. exp insulin/ or exp diabetes mellitus/ or glycosylated hemoglobin/ or (insulin or glucose or glyc?emic control or blood sugar or diabet* or prediabet* or hba1c or glycosylated h?emoglobin or hyperglyc?emi* or hypoglyc?emi* or (weight adj3 (gain* or change* or loss or lose or retention)) or bmi or body mass index or body composition or skinfold thickness or ((hip or waist) adj2 ratio) or ((waist or abdominal) adj2 circumference) or overweight or obes* or adipos* or underweight or normal weight or healthy weight or hypertension or hypotension or fainting or syncope or lightheaded* or light headed* or dizziness or blood pressure or tox?emi* or eph complex or proteinuria or edema or hemodynamic* or haemodynamic* or systolic or diastolic or cardiovascular or cardiometabolic or cardio-metabolic or metabolic or heart or cardio* or cardiac or lipid* or placental growth factor* or triglyceride* or ldl or hdl or lipoprotein or cholesterol).mp.

17. dehydration/ or exp cardiovascular disease/ or (dehydrat* or heart disease* or cardiovascular disease*).mp.

18. adaptation/ or exp thermoregulation/ or fitness/ or endurance/ or (safe* or harm* or risk* or fitness or aerobic capacity or oxygen consumption or vo2 max or vo2max or vo2 peak or vo2peak or frequency or intensity or duration or dose response or fitt or zone or (type* adj2 exercise)).mp.

19. exp backache/ or exp pelvic pain/ or hip pain/ or muscle cramp/ or heat cramp/ or leg cramp/ or ((hip or back or pelvic or pelvis) adj3 (pain or discomfort or ache)).mp. or cramp*.mp.

20. mental health/ or psychological well being/ or exp mental disease/ or body image/ or self concept/ or (mental health or mental disorder* or mental illness* or mental disease* or depression or depressive or mood or anxiety or well being or wellbeing or wellness or body image or self perception).mp.

21. (postur* or supine or valsalva or diastasis recti or rectus abdominis or inter rectus distance or interrectus distance).mp.

22. fatigue/ or exhaustion/ or (fatigue or exhaustion or injur* or trauma or blood loss).mp.

23. chronic disease/ or exp osteoporosis/ or exp urine incontinence/ or (chronic disease* or chronic illness* or osteoporosis or incontinen*).mp.

24. or/16-23

25. 15 and 24

26. 11 or 25

27. exp animal/ not (exp animal/ and human/)

28. 26 not 27

29. remove duplicates from 28

PsycInfo

1. physical activity/ or exp exercise/ or activity level/ or athletes/ or exp sports/ or ((exercise or physical* activ* or strenuous activit* or physical* inactiv* or sedentary or running or plyometric* or yoga or tai chi or weight training or resistance training or swim* or sport* or athlet* or walk or walking or mvpa or ltpa or stretching or aerobic capacity).ti,ab,id. or ((weight* adj2 lift*) or ((muscle or muscular or strength*) adj2 conditioning))).ti,ab,id.

2. obstetrical complications/ or pregnancy outcomes/ or spontaneous abortion/ or "labor (childbirth)"/ or birth/

3. (pregnan* or ((birth or pregnancy or childbirth) adj3 (outcome* or complication*))).mp.

4. (((spontaneous or induc* or onset or length) adj3 (labor or labour)) or c?esarean).mp.

5. (episiotom* or vaginal delivery or gestational diabetes or pre-eclampsia or preeclampsia or gestosis).mp.

6. (((normal or instrumental or assisted) adj2 (delivery or birth or childbirth)) or (forceps or ventouse or vacuum extraction)).mp.

7. ((mode of delivery or type of delivery) and (pregnan* or birth or childbirth or obstetric* or labor or labour)).mp.

8. ((tear* or ruptur* or hemorrhage*) adj2 (placent* or vagin* or membran* or periton*)).mp.

9. (miscarriage* or spontaneous abortion*).mp.

10. or/2-9

11. 1 and 10

12. exp pregnancy/ or pregnan*.ti,hw,id. or (antenatal or prenatal or perinatal or postnatal or prepartum or antepartum or postpartum or primigravid* or primiparous or multiparous or nulliparous or multigravid* or trimester* or obstetric*).ti,id.

13. 1 and 12

14. ((pregnan* or antenatal or prenatal or perinatal or postnatal or prepartum or antepartum or postpartum or pre partum or ante partum or post partum or puerper*) adj5 (exercise or physical* activ* or strenuous activit* or physical inactiv* or sedentary or running or plyometric* or yoga or tai chi or weight training or resistance training or (weight* adj2 lift*) or swim* or sport* or athlet* or walk or walking or ((muscle or muscular or strength*) adj2 conditioning))).ab.

15. 13 or 14

16. insulin/ or diabetes/ or diabetes mellitus/ or (insulin or glucose or glyc?emic control or blood sugar or diabet* or prediabet* or hba1c or glycosylated h?emoglobin or hyperglyc?emi* or hypoglyc?emi* or (weight adj3 (gain* or change* or loss or lose or retention)) or bmi or body mass index or body composition or skinfold thickness or ((hip or waist) adj2 ratio) or ((waist or abdominal) adj2 circumference) or overweight or obes* or adipos* or underweight or normal weight or healthy weight or hypertension or hypotension or fainting or syncope or lightheaded* or light headed* or dizziness or blood pressure or tox?emi* or eph complex or proteinuria or edema or hemodynamic* or haemodynamic* or systolic or diastolic or cardiovascular or cardiometabolic or cardio-metabolic or metabolic or heart or cardio* or cardiac or lipid* or placental growth factor* or triglyceride* or ldl or hdl or lipoprotein or cholesterol).mp.

17. dehydration/ or exp Cardiovascular Disorders/ or (dehydrat* or heart disease* or cardiovascular disease*).mp.

18. "thermoregulation (body)"/ or physical fitness/ or physical endurance/ or (safe* or harm* or risk* or fitness or aerobic capacity or oxygen consumption or vo2 max or vo2max or vo2 peak or vo2peak or frequency or intensity or duration or dose response or fitt or zone or (type* adj2 exercise)).mp.

19. back pain/ or ((hip or back or pelvic or pelvis) adj3 (pain or discomfort or ache)).mp. or cramp*.mp.

20. mental health/ or exp Mental Disorders/ or exp body image/ or self concept/ or (mental health or mental disorder* or mental illness* or mental disease* or depression or depressive or mood or anxiety or well being or wellbeing or wellness or body image or self perception).mp.

21. (postur* or supine or valsalva or diastasis recti or rectus abdominis or inter rectus distance or interrectus distance).mp.

22. fatigue/ or (fatigue or exhaustion or injur* or trauma).mp.

23. Physical Fitness/ or exp Physical Endurance/ or (safe* or harm* or risk* or fitness or aerobic capacity or oxygen consumption or vo2 max or vo2max or vo2 peak or vo2peak or frequency or intensity or duration or dose response or fitt or zone or (type* adj2 exercise)).mp.

24. chronic illness/ or osteoporosis/ or urinary incontinence/ or (chronic disease* or chronic illness* or osteoporosis or incontinen*).mp.

25. or/16-24

26. 15 and 25

27. 11 or 26

28. first posting.ps.

29. (27 not first posting).ps.

30. limit 29 to human

31. 27 and 28

32. 30 or 31

Cochrane Library

#1 [mh Exercise] or [mh "Exercise Movement Techniques"] or [mh "Physical Exertion"] or [mh "Exercise Therapy"] or [mh "Motor Activity"] or [mh "Sedentary Lifestyle"] or (exercise or "physical* activ*" or "strenuous activit* " or " physical* inactiv* " or sedentary or running or plyometric* or yoga or " tai chi" or weight training or resistance training or swim* or sport* or athlet* or walk or walking or mvpa or ltpa or stretching or aerobic capacity or physical* active*):ti,ab,kw (weight* near/2 lift*):ti,ab,kw or ((muscle or muscular or strength*) near/2 conditioning):ti,ab,kw

#2  [mh Pregnancy] or [mh "Pregnancy Complications"] or [mh "Pregnancy Outcome"] or [mh "Pregnancy Trimesters"] or [mh "Peripartum Period"] or [mh "Postpartum Period"] or (pregnan* or antenatal or prenatal or perinatal or postnatal or prepartum or antepartum or postpartum or "pre partum" or "ante partum" or "post partum" or puerper* or primigravid* or primiparous or multiparous or nulliparous or multigravid* or trimester* or obstetric*):ti,kw

#3   #1 AND #2

#4   ((pregnan* or maternal or antenatal or prenatal or perinatal or postnatal or prepartum or antepartum or postpartum or puerper* or "pre partum" or "ante partum" or "post partum") near/5 (exercise or "physical* activ*" or "strenuous activit*" or "physical* inactiv*" or sedentary or running or plyometric* or yoga or "tai chi" or "weight training" or "resistance training" or (weight* near/2 lift*) or swim* or sport* or athlet* or walk or walking or mvpa or ltpa or stretching or "aerobic capacity" or fitness or ((muscle or muscular or strength*) near/2 conditioning))):ab

#5  #3 or #4

#6  [mh "birth weight"] or [mh "fetal weight"]

#7  [mh "infant, low birth weight"] or [mh "infant, small for gestational age"] or [mh "infant, very low birth weight"] or [mh "infant, postmature"] or [mh "infant, premature"]

#8  ((preterm or pre matur* or prematur* or post matur* or postmatur*) near/2 birth):ti,ab,kw

#9  [mh "Fetal Growth Retardation"] or [mh "fetal hypoxia"] or [mh "fetal macrosomia"]

#10  [mh "Fetal Development"] or [mh "Congenital Abnormalities"] or [mh "Fetus"] or (fetus or fetal):ti,kw

#11  [mh "maternal fetal exchange"] or ([mh "Uterus"] and [mh "Regional Blood Flow"]) or (placenta* or uteroplacenta* or (("maternal feta"l or fetomaternal or transplacental) near/2 (transfusion or exchange))):ti,ab,kw

#12  ((fetal or fetus) near/2 (response or matur*)):ti,ab,kw

#13  ((fetal or fetus or neonat* or newborn or infant) near/3 (growth or develop* or viability or viable or weight or wellbeing or "well being" or health or "heart rate" or heartrate or bradycardia or hypoxi* or hypoglycemi* or movement or oxygenation)):ti,ab,kw

#14  (((uterine or uterus) near/2 (blood flow or circulat*)) or ((uterine or umbilical or mid* cerebral) near/2 doppler)):ti,ab,kw

#15  (intrauterine growth or iugr):ti,ab,kw

#16  ((perinatal or fetal or fetus or neonat* or newborn* or infant*) near/3 (mortality or morbidity or death or outcome* or complication*)):ti,ab,kw

#17  ("still birth" or stillbirth):ti,ab,kw

#18  ("birth weight" or birthweight or macrosomia or "gestational age" or lga or sga or preterm or (prematur* near/2 (infant* or neonat* or newborn* or birth or labor))):ti,ab,kw

#19  ((neonatal or newborn* or infant* or fetus or fetal) and (fat* or "abdominal circumference" or "body composition" or bmi or "body mass index" or "waist circumference" or "skeletal size" or height or anthropometric* or apgar or adipos* or ph or "base excess" or metabolic or acidosis or insulin or diabet* or hyperbilirubinemi*)):ti,ab,kw

#20  (fetus or fetal):ti,ab,kw and [mh "adaptation, physiological"]

#21  (((birth or delivery) near/3 (trauma or injur* or defect*)) or (dystocia or nicu or "neonatal intensive care" or "brachial plexus")):ti,ab,kw

#22  [mh "Birth Injuries"]

#23  ((neonat* or infant* or newborn*) and ("ponderal index" or skinfold or bmi or "body mass index")):ti,ab,kw

#24  [mh "Cerebral Palsy"] or [mh "Neural Tube Defects"] or [mh "Cleft Palate"] or ("cerebral palsy" or "neural tube defect*" or "spina bifida" or anencephal* or encephalocele* or iniencephal* or spinal dyraphism or diastematomyel* or lipomingocele* or lipmyelomeningocele* or meningomyelocele* or "cleft palate*" or "cleft lip*"):ti,ab,kw

#25  (((development* or learning or intellectual* or cognitive* or language or communication or speech or motor) near/2 (disorder* or disab* or delay*)) or "behavior disorder*" or "attention deficit" or autis* or asperger* or "child development" or "developmental milestone*" or neurodevelopment* or "cognitive development" or "motor development" or "motor skill*" or "psychosocial development" or "chronic disease*" or "chronic illness*" or cardiovascular or cardiometabolic or diabet* or "heart disease*"):ti,ab,kw or [mh "Heart Disease"] or [mh "Mental Disorders Diagnosed in Childhood"]

#26  [mh "Pediatric Obesity"] or ((child* or pediatric) near/2 (obes* or overweight)):ti,ab,kw

#27  #6 or #7 or #8 or #9 or #10 or #11 or #12 or #13 or #14 or #15 or #16 or #17 or #18 or #19 or #20 or #21 or #22 or #23 or #24 or #25 or #26

#28  #5 AND #27

CINAHL

S1 ( (MH "Exercise+") OR (MH "Athletes+") OR (MH "Therapeutic Exercise+") OR (MH "Physical Fitness+") OR (MH "Physical Activity") OR (MH "Physical Endurance+") OR (MH "Exertion+") OR (MH "Sports+") OR (MH "Life Style, Sedentary") OR (MH "Yoga+") OR (MH "Tai Chi") ) OR TI ( exercise or "physical* activ*" or "strenuous activit*" or "physical* inactiv*" or sedentary or running or plyometric* or yoga or "tai chi" or "weight training" or "resistance training" or swim* or sport* or athlet* or walk or walking or mvpa or ltpa or stretching or "aerobic capacity" or fitness or weight* n2 lift* or (muscle or muscular or strength*) n2 conditioning )

S2 ((MH "Pregnancy Complications+") OR (MH "Pregnancy Outcomes") OR (MH "Pregnancy Trimesters+") OR (MH "Labor+") OR (MH "Delivery, Obstetric+") OR (MH "Surgery, Obstetrical+")) OR TI pregnan* OR MW pregnan*

S3 (birth or pregnancy or childbirth) n3 (outcome* or complication*) or (spontaneous or induc* or onset or length) n3 (labor or labour) or cesarean or caesarean or episiotom* or "vaginal delivery" or "gestational diabetes" or "pre-eclampsia" or preeclampsia or gestosis OR (normal or instrumental or assisted) n2 (delivery or birth or childbirth) or forceps or ventouse or "vacuum extraction" or miscarriage* or "spontaneous abortion*" OR ( ("mode of delivery" or "type of delivery") and (pregnan* or birth or childbirth or obstetric* or labor or labour) ) OR (tear* or ruptur* or hemorrhage*) n2 (placent* or vagin* or membran* or periton*)

S4 S2 OR S3

S5 S1 AND S4

S6 ( (MH "Pregnancy") OR (MH "Pregnancy Trimesters+") ) OR TI ( pregnan* or trimester* or antenatal or prenatal or perinatal or postnatal or prepartum or antepartum or postpartum or "pre partum" or "ante partum" or "post partum" or puerper* or primigravid* or primiparous or multiparous or nulliparous or multigravid* ) OR MW ( antenatal or prenatal or perinatal or postnatal or prepartum or antepartum or postpartum or primigravid* or primiparous or multiparous or nulliparous or multigravid* or trimester* or obstetric* )

S7 S1 and S6

S8 (pregnan* or trimester* or antenatal or prenatal or perinatal or postnatal or prepartum or antepartum or postpartum or "pre partum" or "ante partum" or "post partum" or puerper*) n5 (exercise or "physical* activ*" or "strenuous activit*" or "physical* inactiv*" or sedentary or running or plyometric* or yoga or "tai chi" or "weight training" or "resistance training" or (weight* n2 lift*) or swim* or sport* or athlet* or walk or walking or (muscle or muscular or strength*) n2 conditioning)

S9 S7 or S8

S10 ((MH "Insulin+") OR (MH "Diabetes Mellitus+") OR (MH "Prediabetic State") OR (MH "Hemoglobin A, Glycosylated") ) OR ( insulin or glucose or "glycemic control" or "glycaemic control" or "blood sugar" or diabet* or prediabet* or hba1c or "glycosylated hemoglobin" or "glycosylated haemoglobin" or hyperglycemi* or hyperglycaemi* or hypoglycemi* or hypoglycaemi* or weight n3 (gain* or change* or loss or lose or retention) or bmi or "body mass index" or "body composition" or "skinfold thickness" or (hip or waist) n2 ratio or (waist or abdominal) n2 circumference or overweight or obes* or adipos* or underweight or "normal weight" or "healthy weight" or hypertension or hypotension or fainting or syncope or lightheaded* or "light headed*" or dizziness or "blood pressure" or toxemi* or toxaemi* or "eph complex" or proteinuria or edema or hemodynamic* or haemodynamic* or systolic or diastolic or cardiovascular or cardiometabolic or "cardio-metabolic" or metabolic or heart or cardio* or cardiac or lipid* or "placental growth factor*" or triglyceride* or ldl or hdl or lipoprotein or cholesterol )

S11 ((MH "Dehydration") OR (MH "Cardiovascular Diseases+") ) OR ( dehydrat* or heart disease* or "cardiovascular disease*" )

S12 ((MH "Adaptation, Physiological") OR (MH "Body Temperature Regulation+") OR (MH "Physical Fitness+") OR (MH "Physical Endurance+") ) OR MW metabolism OR ( safe* or harm* or risk* or fitness or "aerobic capacity" or "oxygen consumption" or "vo2 max" or vo2max or "vo2 peak" or vo2peak or frequency or intensity or duration or "dose response" or fitt or zone or type* n2 exercise )

S13 ((MH "Chronic Disease") OR (MH "Urinary Incontinence+") OR (MH "Osteoporosis+") ) OR ( "chronic disease*" or "chronic illness*" or osteoporosis or incontinen* )

S14 ((MH "Back Pain+") OR (MH "Pelvic Pain+") OR (MH "Muscle Cramp") ) OR ( cramp* or (hip or back or pelvic or pelvis) n3 (pain or discomfort or ache) )

S15 ((MH "Mental Health") OR (MH "Mental Disorders+") OR (MH "Psychological Well-Being") OR (MH "Body Image") OR (MH "Self Concept")) OR ( "mental health" or "mental disorder*" or "mental illness*" or "mental disease*" or depression or depressive or mood or anxiety or "well being" or wellbeing or wellness or "body image" or "self perception" )

S16 (MH "Fatigue") or fatigue or exhaustion or injur* or trauma

S17 postur* or supine or valsalva or "diastasis recti" or "rectus abdominis" or "inter rectus distance" or "interrectus distance"

S18 S10 OR S11 OR S12 OR S13 OR S14 OR S15 OR S16 OR S17

S19 S9 AND S18

S20 S5 OR S19

Sport Discus

S1 (birth or pregnancy or childbirth) n3 (outcome* or complication*) or (spontaneous or induc* or onset or length) n3 (labor or labour) or cesarean or caesarean or episiotom* or "vaginal delivery" or "gestational diabetes" or "pre-eclampsia" or preeclampsia or gestosis) OR (normal or instrumental or assisted) n2 (delivery or birth or childbirth) or forceps or ventouse or "vacuum extraction" or miscarriage* or "spontaneous abortion*" OR ( ("mode of delivery" or "type of delivery") and (pregnan* or birth or childbirth or obstetric* or labor or labour) ) OR (tear* or ruptur* or hemorrhage*) n2 (placent* or vagin* or membran* or periton*) OR antenatal or prenatal or perinatal or postnatal or prepartum or antepartum or postpartum or "pre partum" or "ante partum" or "post partum" or puerper* or primigravid* or primiparous or multiparous or nulliparous or multigravid* or pregnan* or trimester* or obstetric*

S2 exercise or "physical* activ*" or "strenuous activit*" or "physical* inactiv*" or sedentary or running or plyometric* or yoga or "tai chi" or "weight training" or "resistance training" or swim* or sport* or athlet* or walk or walking or mvpa or ltpa or stretching or "aerobic capacity" or fitness or weight* n2 lift* or (muscle or muscular or strength*) n2 conditioning

S3 S1 and S2

[Limited to Academic Journal, Dissertation, Report]

Child Development & Adolescent Studies

exercise or "physical* activ*" or "strenuous activit*" or "physical* inactiv*" or sedentary or running or plyometric* or yoga or "tai chi" or "weight training" or "resistance training" or swim* or sport* or athlet* or walk or walking or mvpa or ltpa or stretching or "aerobic capacity" or fitness or weight* n2 lift* or (muscle or muscular or strength*) n2 conditioning

AND

pregnan* or antenatal or prenatal or perinatal or postnatal or prepartum or antepartum or postpartum or primigravid* or primiparous or multiparous or nulliparous or multigravid* or or trimester* or obstetric* or ( (birth or pregnancy or childbirth) n3 (outcome* or complication*) or (spontaneous or induc* or onset or length) n3 (labor or labour) or cesarean or caesarean or episiotom* or "vaginal delivery" or "gestational diabetes" or "pre-eclampsia" or preeclampsia or gestosis OR (normal or instrumental or assisted) n2 (delivery or birth or childbirth) or forceps or ventouse or "vacuum extraction" or miscarriage* or "spontaneous abortion*" OR ( ("mode of delivery" or "type of delivery") and (pregnan* or birth or childbirth or obstetric* or labor or labour) ) OR ( (tear* or ruptur* or hemorrhage*) n2 (placent* or vagin* or membran* or periton*)

[Limitedto Academic Journal]

ERIC

exercise or "physical* activ*" or "strenuous activit*" or "physical* inactiv*" or sedentary or running or plyometric* or yoga or "tai chi" or "weight training" or "resistance training" or swim* or sport* or athlet* or walk or walking or mvpa or ltpa or stretching or "aerobic capacity" or fitness or weight* n2 lift* or (muscle or muscular or strength*) n2 conditioning

AND

pregnan* or antenatal or prenatal or perinatal or postnatal or prepartum or antepartum or postpartum or primigravid* or primiparous or multiparous or nulliparous or multigravid* or or trimester* or obstetric* or ( (birth or pregnancy or childbirth) n3 (outcome* or complication*) or (spontaneous or induc* or onset or length) n3 (labor or labour) or cesarean or caesarean or episiotom* or "vaginal delivery" or "gestational diabetes" or "pre-eclampsia" or preeclampsia or gestosis OR (normal or instrumental or assisted) n2 (delivery or birth or childbirth) or forceps or ventouse or "vacuum extraction" or miscarriage* or "spontaneous abortion*" OR ( ("mode of delivery" or "type of delivery") and (pregnan* or birth or childbirth or obstetric* or labor or labour) ) OR ( (tear* or ruptur* or hemorrhage*) n2 (placent* or vagin* or membran* or periton*)

[Limited to Academic Journals]

Scopus

(((TITLE-ABS-KEY(((birth or pregnancy or childbirth) w/3 (outcome* or complication*)) or ((spontaneous or induc* or onset or length) w/3 (labor or labour)) or cesarean or caesarean or episiotom* or "vaginal delivery" or "gestational diabetes" or "pre-eclampsia" or preeclampsia or gestosis OR ( (normal or instrumental or assisted) w/2 (delivery or birth or childbirth) or forceps or ventouse or "vacuum extraction" or miscarriage* or "spontaneous abortion*" ) OR (("mode of delivery" or "type of delivery") and (pregnan* or birth or childbirth or obstetric* or labor or labour) ) OR ( (tear* or ruptur* or hemorrhage*) w/2 (placent* or vagin* or membran* or periton*)) OR antenatal or prenatal or perinatal or postnatal or prepartum or antepartum or postpartum or "pre partum" or "ante partum" or "post partum" or puerper* or primigravid* or primiparous or multiparous or nulliparous or multigravid* or pregnan* or obstetric* or trimester*))) AND (TITLE ( exercise* OR "physical* activ*" OR "strenuous activit*" OR "physical inactiv*" OR sedentary OR running OR plyometric* OR yoga OR "tai chi" OR "weight training" OR "resistance training" OR swim* OR sport* OR athlet* OR walk OR walking OR "muscle strengthening" OR "muscle conditioning" OR "muscular conditioning" OR "weight lifting" OR "lifting weight*" ))) OR ((TITLE-ABS-KEY((insulin or glucose or "glycemic control" or "glycaemic control" or "blood sugar" or diabet* or prediabet* or hba1c or "glycosylated hemoglobin" or "glycosylated haemoglobin" or hyperglycemi* or hyperglycaemi* or hypoglycemi* or hypoglycaemi* or (weight w/3 (gain* or change* or loss or lose or retention)) or bmi or "body mass index" or "body composition" or "skinfold thickness" or ((hip or waist) w/2 ratio) or ((waist or abdominal) w/2 circumference) or overweight or obes* or adipos* or underweight or "normal weight" or "healthy weight" or hypertension or hypotension or fainting or syncope or lightheaded* or "light headed*" or dizziness or "blood pressure" or toxemi* or toxaemi* or "eph complex" or proteinuria or edema or hemodynamic* or haemodynamic* or systolic or diastolic or cardiovascular or cardiometabolic or "cardio-metabolic" or metabolic or heart or cardio* or cardiac or lipid* or "placental growth factor*" or triglyceride* or ldl or hdl or lipoprotein or cholesterol or dehydrat* or heart disease* or "cardiovascular disease*" or safe* or harm* or risk* or fitness or "aerobic capacity" or "oxygen consumption" or "vo2 max" or vo2max or "vo2 peak" or vo2peak or frequency or intensity or duration or "dose response" or fitt or zone or (type* w/2 exercise) or "chronic disease*" or "chronic illness*" or osteoporosis or incontinen* or cramp* or ((hip or back or pelvic or pelvis) w/3 (pain or discomfort or ache)) or "mental health" or "mental disorder*" or "mental illness*" or "mental disease*" or depression or depressive or mood or anxiety or "well being" or wellbeing or wellness or fatigue or exhaustion or injur* or trauma or postur* or supine or valsalva or "diastasis recti" or "rectus abdominis" or "inter rectus distance" or "interrectus distance"))) AND (((TITLE(exercise* or "physical* activ*" or "strenuous activit*" or "physical inactiv*" or sedentary or running or plyometric* or yoga or "tai chi" or "weight training" or "resistance training" or swim* or sport* or athlet* or walk or walking OR "muscle strengthening" or "muscle conditioning" or "muscular conditioning" or "weight lifting" or "lifting weight*") AND TITLE-ABS-KEY(pregnan* or antenatal or prenatal or perinatal or postnatal or prepartum or antepartum or postpartum or "pre partum" or "ante partum" or "post partum" or puerper*)) AND (TITLE-ABS-KEY ( pregnan* OR antenatal OR prenatal OR perinatal OR postnatal OR prepartum OR antepartum OR postpartum OR "pre partum" OR "ante partum" OR "post partum" OR puerper* ))))) AND NOT (TITLE(rat or rats or mouse or mice or cow or cows or bovine or sheep or ewe*))

Web of Science Core Collection (including Emerging Science Citation Index)

#1 TI=(exercise* or "physical* activ*" or "strenuous activit*" or "physical inactiv*" or sedentary or running or plyometric* or yoga or "tai chi" or "weight training" or "resistance training" or swim* or sport* or athlet* or walk or walking or (muscle* or muscular or strength) near/2 conditioning or weight* near/2 lift*)

#2 TS=(pregnan* or antenatal or prenatal or perinatal or postnatal or prepartum or antepartum or postpartum or "pre partum" or "ante partum" or "post partum" or puerper* or primigravid* or primiparous or multiparous or nulliparous or multigravid* or trimester* or obstetric*)

#3 #1 AND #2

#4 TS=(insulin or glucose or "glycemic control" or "glycaemic control" or "blood sugar" or diabet* or prediabet* or hba1c or "glycosylated hemoglobin" or "glycosylated haemoglobin" or hyperglycemi* or hyperglycaemi* or hypoglycemi* or hypoglycaemi* or (weight near/3 (gain* or change* or loss or lose or retention)) or bmi or "body mass index" or "body composition" or "skinfold thickness" or ((hip or waist) near/2 ratio) or ((waist or abdominal) near2 circumference) or overweight or obes* or adipos* or underweight or "normal weight" or "healthy weight" or hypertension or hypotension or fainting or syncope or lightheaded* or "light headed*" or dizziness or "blood pressure" or toxemi* or toxaemi* or "eph complex" or proteinuria or edema or hemodynamic* or haemodynamic* or systolic or diastolic or cardiovascular or cardiometabolic or "cardio-metabolic" or metabolic or heart or cardio* or cardiac or lipid* or "placental growth factor*" or triglyceride* or ldl or hdl or lipoprotein or cholesterol or dehydrat* or heart disease* or "cardiovascular disease*" or safe* or harm* or risk* or fitness or "aerobic capacity" or "oxygen consumption" or "vo2 max" or vo2max or "vo2 peak" or vo2peak or frequency or intensity or duration or "dose response" or fitt or zone or (type* near2 exercise) or "chronic disease*" or "chronic illness*" or osteoporosis or incontinen* or cramp* or ((hip or back or pelvic or pelvis) near/3 (pain or discomfort or ache)) or "mental health" or "mental disorder*" or "mental illness*" or "mental disease*" or depression or depressive or mood or anxiety or "well being" or wellbeing or wellness or fatigue or exhaustion or injur* or traumaor postur* or supine or valsalva or "diastasis recti" or "rectus abdominis" or "inter rectus distance" or "interrectus distance")

#5 #3 AND #4

#6 TS=((birth or pregnancy or childbirth) near/3 (outcome* or complication*) or (spontaneous or induc* or onset or length) near/3 (labor or labour) or cesarean or caesarean or episiotom* or "vaginal delivery" or "gestational diabetes" or "pre-eclampsia" or preeclampsia or gestosis OR (normal or instrumental or assisted) near/2 (delivery or birth or childbirth) or forceps or ventouse or "vacuum extraction" or miscarriage* or "spontaneous abortion*" OR ("mode of delivery" or "type of delivery") and (pregnan* or birth or childbirth or obstetric* or labor or labour) OR (tear* or ruptur* or hemorrhage*) near/2 (placent* or vagin* or membran* or periton*))

#7 #1 AND #6

#8 #5 OR #7

#9 TS=(rat or rats or mouse or mice or cow or cows or bovine or sheep or ewe*)

#10 #9 NOT #8

Clinicatrials.gov

(exercise OR "physical activity" ) AND (antenatal OR prenatal OR perinatal OR postnatal OR prepartum OR antepartum OR postpartum OR "pre partum" OR fetus OR foetus OR fetal OR foetal)

(exercise OR "physical activity" ) AND ("ante partum" OR "post partum" OR puerper* OR primigravida OR primiparous OR multiparous OR nulliparous OR multigravida OR trimester OR trimesters OR obstetric)

*Fetal Outcomes Strategies*

MEDLINE

1. exp Exercise/ or Athletes/ or exp Exercise Movement Techniques/ or exp Exercise Therapy/ or exp Sports/ or Motor Activity/ or Physical Exertion/ or Sedentary Lifestyle/ or (exercise or physical* activ* or physical* inactiv* or sedentary or running or plyometric* or yoga or tai chi or weight training or resistance training or swim* or sport* or athlet* or walk or walking or mvpa or ltpa or stretching or aerobic capacity or fitness).ti,kf. or exercise.ab. /freq=2 or (weight* adj2 lift*).ti,kf. or ((muscle or muscular or strength*) adj2 conditioning).ti,kf.

2. Pregnancy/ or exp Pregnancy Complications/ or Pregnancy Outcome/ or exp Pregnancy Trimesters/ or Peripartum Period/ or Postpartum Period/ or pregnan*.hw. or (pregnan* or antenatal or prenatal or perinatal or postnatal or prepartum or antepartum or postpartum or pre partum or ante partum or post partum or puerper* or primigravid* or primiparous or multiparous or nulliparous or multigravid* or trimester* or obstetric*).ti,kf.

3. 1 and 2

4. ((pregnan* or maternal or antenatal or prenatal or perinatal or postnatal or prepartum or antepartum or postpartum or puerper* or pre partum or ante partum or post partum) adj5 (exercise or physical* activ* or strenuous activit* or physical* inactiv* or sedentary or running or plyometric* or yoga or tai chi or weight training or resistance training or (weight* adj2 lift*) or swim* or sport* or athlet* or walk or walking or mvpa or ltpa or stretching or aerobic capacity or fitness or ((muscle or muscular or strength*) adj2 conditioning))).ab.

5. 3 or 4

6. exp birth weight/ or fetal weight/

7. infant, low birth weight/ or infant, small for gestational age/ or exp infant, very low birth weight/ or infant, postmature/ or exp infant, premature/

8. ((preterm or pre matur* or prematur* or post matur* or postmatur*) adj2 birth).mp.

9. Fetal Growth Retardation/ or fetal hypoxia/ or fetal macrosomia/

10. exp Fetal Development/ or exp Congenital Abnormalities/ or exp Fetus/ or (f?etus or f?etal).ti,hw,kf.

11. maternal fetal exchange/ or (exp Uterus/ and exp Regional Blood Flow/) or (placenta* or uteroplacenta* or ((maternal f?etal or f?etomaternal or transplacental) adj2 (transfusion or exchange))).mp.

12. ((f?etal or f?etus) adj2 (response or matur*)).mp.

13. ((f?etal or f?etus or neonat* or newborn or infant) adj3 (growth or develop* or viability or viable or weight or wellbeing or well being or health or heart rate or heartrate or bradycardia or hypoxi* or hypoglyc?emi* or movement or oxygenation)).mp.

14. (((uterine or uterus) adj2 (blood flow or circulat*)) or ((uterine or umbilical or mid* cerebral) adj2 doppler)).mp.

15. (intrauterine growth or iugr).mp.

16. ((perinatal or f?etal or f?etus or neonat* or newborn* or infant*) adj3 (mortality or morbidity or death or outcome* or complication*)).mp.

17. (still birth or stillbirth).mp.

18. (birth weight or birthweight or macrosomia or gestational age or lga or sga or preterm or (prematur* adj2 (infant* or neonat* or newborn* or birth or labo?r))).mp.

19. ((neonatal or newborn* or infant* or f?etus or f?etal) and (fat* or abdominal circumference or body composition or bmi or body mass index or waist circumference or skeletal size or height or anthropometric* or apgar or adipos* or ph or base excess or metabolic or acidosis or insulin or diabet* or hyperbilirubin?emi*)).mp.

20. (f?etus or f?etal).mp. and (adaptation, physiological/ or me.fs.)

21. (((birth or delivery) adj3 (trauma or injur* or defect*)) or (dystocia or nicu or neonatal intensive care or brachial plexus)).mp.

22. exp Birth Injuries/

23. ((neonat* or infant* or newborn*) and (ponderal index or skinfold or bmi or body mass index)).mp.

24. Cerebral Palsy/ or exp Neural Tube Defects/ or Cleft Palate/ or (cerebral palsy or neural tube defect* or spina bifida or anencephal* or encephalocele* or iniencephal* or spinal dyraphism or diastematomyel* or lipomingocele* or lipmyelomeningocele* or meningomyelocele* or cleft palate* or cleft lip*).mp.

25. (((development* or learning or intellectual* or cognitive* or language or communication or speech or motor) adj2 (disorder* or disab* or delay*)) or behavio?r disorder* or attention deficit or autis* or asperger* or child development or developmental milestone* or neurodevelopment* or cognitive development or motor development or motor skill* or psychosocial development or chronic disease* or chronic illness* or cardiovascular or cardiometabolic or diabet* or heart disease*).mp. or exp Heart Disease/ or exp Mental Disorders Diagnosed in Childhood/

26. Pediatric Obesity/ or ((child* or p?ediatric) adj2 (obes* or overweight)).mp.

27. or/6-25

28. 5 and 27

29. (animals/ not (animals/ and humans/)) or ((rat or rats or mouse or mice or cow or cows or bovine or sheep or ewe*) not ((rat or rats or mouse or mice or cow or cows or bovine or cattle or sheep or ewe*) and (human* or women))).ti,ab,kf. or (rat or rats or mouse or mice or cow or cows or bovine or cattle or sheep or ewe*).ti.

30. 28 not 29

EMBASE

1. exp *exercise/ or *athlete/ or exp *kinesiotherapy/ or exp *sport/ or exp *physical activity/ or *sedentary lifestyle/ or (exercise or physical* activ* or physical* inactiv* or sedentary or running or plyometric* or yoga or tai chi or weight training or resistance training or swim* or sport* or athlet* or walk or walking or mvpa or ltpa or stretching or aerobic capacity or fitness or sport*).ti,kw. or exercise.ab. /freq=2 or (weight* adj2 lift*).ti,kw. or ((muscle or muscular or strength*) adj2 conditioning).ti,kw.

2. exp pregnancy/ or exp pregnancy complications/ or pregnancy outcome/ or perinatal period/ or puerperium/ or pregnan*.hw. or (pregnan* or antenatal or prenatal or perinatal or postnatal or prepartum or antepartum or postpartum or pre partum or ante partum or post partum or puerper* or primigravid* or primiparous or multiparous or nulliparous or multigravid* or trimester* or obstetric*).ti,kw.

3. 1 and 2

4. ((pregnan* or maternal or antenatal or prenatal or perinatal or postnatal or prepartum or antepartum or postpartum or pre partum or ante partum or post partum or puerper*) adj5 (exercise or physical* activ* or strenuous activit* or physical* inactiv* or sedentary or running or plyometric* or yoga or tai chi or weight training or resistance training or (weight* adj2 lift*) or swim* or sport* or athlet* or walk or walking or mvpa or ltpa or stretching or aerobic capacity or fitness or ((muscle or muscular or strength*) adj2 conditioning))).ab.

5. 3 or 4

6. fetus/ or exp birth weight/ or fetus weight/ or "parameters concerning the fetus, newborn and pregnancy"/ or apgar score/ or fetus heart rate/ or exp fetus maturity/ or fetus mortality/ or fetus outcome/ or fetus risk/ or gestational age/ or live birth/ or exp perinatal morbidity/ or exp perinatal mortality/ or prenatal mortality/ or exp intrauterine growth retardation/ or exp "immature and premature labor"/ or exp fetus growth/ or exp prenatal growth/ or fetus hypoxia/ or macrosomia/ or exp fetus development/ or exp congenital disorder/ or exp fetus disease/ or fetomaternal transfusion/ or exp stillbirth/ or spontaneous abortion/ or birth injury/ or cerebral palsy/ or exp neural tube defect/ or child development/ or postnatal development/ or exp mental development/ or childhood obesity/ or exp body composition/ or anthropometric parameters/ or abdominal circumference/ or hip circumference/ or sagittal abdominal diameter/ or waist circumference/ or waist hip ratio/ or waist to height ratio/ or weight height ratio/

7. placenta insufficiency/

8. 6 or 7

9. (f?etus or f?etal).ti,hw,kw. or ((f?etal or f?etus) adj2 (response or matur*)).mp.

10. (placenta* or uteroplacenta* or ((maternal f?etal or transplacental or f?etomaternal) adj2 (exchange or transfusion))).mp.

11. ((f?etal or f?etus or neonat* or newborn or infant) adj3 (growth or develop* or viability or viable or weight or wellbeing or well being or health or heart rate or heartrate or bradycardia or hypoxi* or hypoglyc?emi* or movement or oxygenation)).mp.

12. (((uterine or uterus) adj2 (blood flow or circulat*)) or ((uterine or umbilical or mid* cerebral) adj2 doppler)).mp.

13. (intrauterine growth or iugr).mp.

14. ((perinatal or f?etal or f?etus or neonat* or newborn* or infant*) adj3 (mortality or death or outcome* or complication*)).mp.

15. (still birth or stillbirth).mp.

16. (birth weight or birthweight or macrosomia or gestational age or lga or sga or preterm or (prematur* adj2 (infant* or neonat* or newborn* or birth or labo?r))).mp.

17. ((neonatal or newborn* or infant* or f?etus or f?etal) and (fat* or abdominal circumference or body composition or bmi or body mass index or waist circumference or skeletal size or height or anthropometric* or apgar or adipos* or ph or base excess or metabolic or acidosis or insulin or diabet* or hyperbilirubin?emi*)).mp.

18. (((birth or delivery) adj3 (trauma or injur* or defect*)) or (dystocia or nicu or neonatal intensive care or brachial plexus)).mp.

19. ((neonat* or infant* or newborn*) and (ponderal index or skinfold or bmi or body mass index)).mp.

20. (cerebral palsy or neural tube defect* or spina bifida or anencephal* or encephalocele* or iniencephal* or spinal dyraphism or diastematomyel* or lipomingocele* or lipmyelomeningocele* or meningomyelocele* or cleft palate* or cleft lip*).mp.

21. (((development* or learning or intellectual* or cognitive* or language or communication or speech or motor) adj2 (disorder* or disab* or delay* or impair*)) or behavio?r disorder* or attention deficit or autis* or asperger* or child development or developmental milestone* or neurodevelopment* or cognitive development or motor development or motor skill* or psychosocial development or chronic disease* or chronic illness* or cardiovascular or cardiometabolic or diabet* or heart disease*).mp. or childhood disease/ or exp infant disease/ or exp "disorders of higher cerebral function"/ or exp heart disease/

22. ((child* or p?ediatric) adj2 (obes* or overweight)).mp.

23. or/9-22

24. 8 or 23

25. 5 and 24

26. exp animal/ not (exp animal/ and human/)

27. 25 not 26

PsycInfo

1. physical activity/ or exp exercise/ or activity level/ or athletes/ or exp sports/ or ((exercise or physical* activ* or strenuous activit* or physical* inactiv* or sedentary or running or plyometric* or yoga or tai chi or weight training or resistance training or swim* or sport* or athlet* or walk or walking or mvpa or ltpa or stretching or aerobic capacity).ti,ab,id. or ((weight* adj2 lift*) or ((muscle or muscular or strength*) adj2 conditioning))).ti,ab,id.

2. exp pregnancy/ or obstetrical complications/ or pregnancy outcomes/ or pregnan*.ti,hw,id. or (antenatal or prenatal or perinatal or postnatal or prepartum or antepartum or postpartum or primigravid* or primiparous or multiparous or nulliparous or multigravid* or trimester* or obstetric*).ti,ab,id.

3. 1 and 2

4. prenatal development/ or birth weight/ or prenatal exposure/ or premature birth/ or fetus/ or amniotic fluid/ or (blood flow/ and uterus/)

5. (f?etus or f?etal or ((preterm or pre matur* or prematur* or post matur* or postmatur*) adj2 birth)).mp.

6. (placenta* or uteroplacenta* or ((maternal f?etal or f?etomaternal or transplacental) adj2 (transfusion or exchange))).mp.

7. ((neonat* or newborn or infant) adj3 (growth or develop* or viability or viable or weight or wellbeing or well being or health or heart rate or heartrate or bradycardia or hypoxi* or hypoglyc?emi* or movement or oxygenation)).mp.

8. (((uterine or uterus) adj2 (blood flow or circulat*)) or ((uterine or umbilical or mid* cerebral) adj2 doppler)).mp.

9. (intrauterine growth or iugr).mp.

10. ((perinatal or f?etal or f?etus or neonat* or newborn* or infant*) adj3 (mortality or morbidity or death or outcome* or complication*)).mp.

11. (still birth or stillbirth).mp.

12. (birth weight or birthweight or macrosomia or gestational age or lga or sga or preterm or (prematur* adj2 (infant* or neonat* or newborn* or birth or labo?r))).mp.

13. ((neonatal or newborn* or infant* or f?etus or f?etal) and (fat* or abdominal circumference or body composition or bmi or body mass index or waist circumference or skeletal size or height or anthropometric* or apgar or adipos* or ph or base excess or metabolic or acidosis or insulin or diabet* or hyperbilirubin?emi*)).mp.

14. (((birth or delivery) adj3 (trauma or injur* or defect*)) or (dystocia or nicu or neonatal intensive care or brachial plexus)).mp.

15. birth injuries/ or birth trauma/

16. ((neonat* or infant* or newborn*) and (ponderal index or skinfold or bmi or body mass index)).mp.

17. exp congenital disorders/ or cerebral palsy/ or cleft palata/ or (cerebral palsy or neural tube defect* or spina bifida or anencephal* or encephalocele* or iniencephal* or spinal dyraphism or diastematomyel* or lipomingocele* or lipmyelomeningocele* or meningomyelocele* or cleft palate* or cleft lip*).mp.

18. exp developmental disabilities/ or exp communication disorders/ or exp delayed development/ or exp intellectual development disorder/ or exp learning disorders/ or exp nervous system disorders/ or exp pervasive developmental disorders/

19. (((development* or learning or intellectual* or cognitive* or language or communication or speech or motor) adj2 (disorder* or disab* or delay*)) or behavio?r disorder* or attention deficit or autis* or asperger* or child development or developmental milestone* or neurodevelopment* or cognitive development or motor development or motor skill* or psychosocial development or chronic disease* or chronic illness* or cardiovascular or cardiometabolic or diabet* or heart disease*).mp. or health disorders/

20. ((child* or p?ediatric) adj2 (obes* or overweight)).mp.

21. or/4-20

22. 3 and 21

23. first posting.ps.

24. 22 not 23

25. limit 24 to human

26. 22 not 24

27. 25 or 26

CINAHL

S1 ( (MH "Exercise+") OR (MH "Athletes+") OR (MH "Therapeutic Exercise+") OR (MH "Physical Fitness+") OR (MH "Physical Activity") OR (MH "Physical Endurance+") OR (MH "Exertion+") OR (MH "Sports+") OR (MH "Life Style, Sedentary") OR (MH "Yoga+") OR (MH "Tai Chi") ) OR TI ( exercise or "physical* activ*" or "strenuous activit*" or "physical* inactiv*" or sedentary or running or plyometric* or yoga or "tai chi" or "weight training" or "resistance training" or swim* or sport* or athlet* or walk or walking or mvpa or ltpa or stretching or "aerobic capacity" or fitness or weight* n2 lift* or (muscle or muscular or strength*) n2 conditioning )

S2 ( (MH "Pregnancy") OR (MH "Pregnancy Complications+") OR (MH "Pregnancy Outcomes") OR (MH "Pregnancy Trimesters+") OR (MH "Postnatal Period") OR (MH "Puerperium") ) OR MW pregnan* OR TI ( pregnan* or antenatal or prenatal or perinatal or postnatal or prepartum or antepartum or postpartum or pre partum or ante partum or post partum or puerper* or primigravid* or primiparous or multiparous or nulliparous or multigravid* or trimester* or obstetric* )

S3 S1 AND S2

S4 AB ((pregnan* or maternal or antenatal or prenatal or perinatal or postnatal or prepartum or antepartum or postpartum or puerper* or "pre partum" or "ante partum" or "post partum") n5 (exercise or "physical* activ*" or "strenuous activit*" or "physical* inactiv*" or sedentary or running or plyometric* or yoga or "tai chi" or "weight training" or "resistance training" or weight* n2 lift* or "lift* weight*" or swim* or sport* or athlet* or walk or walking or mvpa or ltpa or stretching or "aerobic capacity" or fitness or (muscle or muscular or strength*) n2 conditioning)

S5 S3 OR S4

S6 (MH "Birth Weight") OR (MH "Infant, Very Low Birth Weight") OR (MH "Infant, Low Birth Weight+") OR (MH "Fetal Weight") OR (MH "Infant, Small for Gestational Age") OR (MH "Infant, Premature") OR (MH "Infant, Premature, Diseases+") OR (MH "Fetal Growth Retardation") OR (MH "Fetal Anoxia") OR (MH "Fetal Macrosomia") OR (MH "Infant, Postmature") OR (MH "Infant, Large for Gestational Age") OR (MH "Fetus+") OR (MH "Maternal-Fetal Exchange") OR (MH "Perinatal Death") OR (MH "Birth Injuries+") OR (MH "Cerebral Palsy") OR (MH "Neural Tube Defects+") OR (MH "Cleft Palate") OR (MH "Heart Diseases+") OR (MH "Mental Disorders Diagnosed in Childhood+") OR (MH "Pediatric Obesity")

S7 (MH "Uterus+") AND (MH "Blood Circulation+")

S8 ( TI (f#etus or f#etal) or MW (f#etus OR f#etal OR ( placenta* or uteroplacenta* or ("maternal f#etal" or f#etomaternal or transplacental) w2 (transfusion or exchange) or (f#etal or f#etus) w2 (response or matur*) )

S9 ( (f#etal or f#etus or neonat* or newborn or infant) n3 (growth or develop* or viability or viable or weight or wellbeing or "well being" or health or "heart rate" or heartrate or bradycardia or hypoxi* or hypoglyc#emi* or movement or oxygenation) ) OR ( (uterine or uterus) n2 ("blood flow" or circulat*) or (uterine or umbilical or mid* cerebral) n2 doppler ) OR ( "intrauterine growth" or iugr )

S10 ( (perinatal or f#etal or f#etus or neonat* or newborn* or infant*) n3 (mortality or morbidity or death or outcome* or complication*) ) OR ( "still birth" or stillbirth or (preterm or "pre matur*" or prematur* or "post matur*" or postmatur*) w2 (birth or childbirth or labo#r or infant* or newborn* or neonat*) ) OR ( "birth weight" or birthweight or macrosomia or "gestational age" or lga or sga )

S11 ( (perinatal or f#etal or f#etus or neonat* or newborn* or infant*) n3 (mortality or morbidity or death or outcome* or complication*) ) OR ( "still birth" or stillbirth or (preterm or pre matur* or prematur* or post matur* or postmatur*) w2 (birth or childbirth or labo#r or infant* or newborn* or neonat*) ) OR ( "birth weight" or birthweight or macrosomia or gestational age or lga or sga ) OR ( (neonatal or newborn* or infant* or fetus or fetal or foetus or foetal) and (fat* or "abdominal circumference" or "body composition" or bmi or "body mass index" or "waist circumference" or "skeletal size" or height or anthropometric* or apgar or adipos* or ph or base n2 excess or metabolic or acidosis or insulin or diabet* or hyperbilirubin#emi*) )

S12 ( (MH "Adaptation, Physiological") OR MM metabolism ) AND ( f#etus or f#etal )

S13 ( (birth or delivery) n3 (trauma or injur* or defect*) or dystocia or nicu or "neonatal intensive care" or "brachial plexus" ) OR ( (neonat* or infant* or newborn*) and (ponderal index or skinfold or bmi or body mass index) ) OR ( "cerebral palsy" or "neural tube defect*" or "spina bifida" or anencephal* or encephalocele* or iniencephal* or "spinal dyraphism" or diastematomyel* or lipomingocele* or lipmyelomeningocele* or meningomyelocele* or "cleft palate*" or "cleft lip*" )

S14 ( (development* or learning or intellectual* or cognitive* or language or communication or speech or motor) n2 (disorder* or disab* or delay*) ) OR ( "behavio#r disorder*" or "attention deficit" or autis* or asperger* or "child development" or "developmental milestone*" or neurodevelopment* or "cognitive development" or "motor development" or "motor skill*" or "psychosocial development" or "chronic disease*" or "chronic illness*" or cardiovascular or cardiometabolic or diabet* or "heart disease*" ) OR ( (child* or p#ediatric) n2 (obes* or overweight) )

S15 S6 OR S7 OR S8 OR S9 OR S10 OR S11 OR S12 OR S13 OR S14

S16 S5 AND S15

Sport Discus/Child Development & Adolescent Studies/ERIC

S1 exercise or "physical* activ*" or "strenuous activit*" or "physical* inactiv*" or sedentary or running or plyometric* or yoga or "tai chi" or "weight training" or "resistance training" or swim* or sport* or athlet* or walk or walking or mvpa or ltpa or stretching or "aerobic capacity" or fitness or weight* n2 lift* or (muscle or muscular or strength*) n2 conditioning

S2 pregnan* or antenatal or prenatal or perinatal or postnatal or prepartum or antepartum or postpartum or "pre partum" or "ante partum" or "post partum" or puerper* or primigravid* or primiparous or multiparous or nulliparous or multigravid* or trimester* or obstetric*

S3 S1 and S2

S4 ( f#etus or f#etal or ( placenta* or uteroplacenta* or ("maternal f#etal" or f#etomaternal or transplacental) w2 (transfusion or exchange) or (f#etal or f#etus) w2 (response or matur*) ) ) OR ( (f#etal or f#etus or neonat* or newborn or infant) n3 (growth or develop* or viability or viable or weight or wellbeing or "well being" or health or heart rate or heartrate or bradycardia or hypoxi* or hypoglyc#emi* or movement or oxygenation) ) OR ( (uterine or uterus) n2 ("blood flow" or "blood circulat*") or (uterine or umbilical or mid* cerebral) n2 doppler or "intrauterine growth" or iugr )

S5 ( (perinatal or f#etal or f#etus or neonat* or newborn* or infant*) n3 (mortality or morbidity or death or outcome* or complication*) ) OR ( "still birth" or stillbirth or (preterm or "pre matur*" or prematur* or "post matur*" or postmatur*) w2 (birth or childbirth or labo#r or infant* or newborn* or neonat*) ) OR ( “birth weight" or birthweight or macrosomia or "gestational age" or lga or sga ) OR ( (neonatal or newborn* or infant* or f#etus or f#etal) and (fat* or "abdominal circumference" or "body composition" or bmi or "body mass index" or "waist circumference" or "skeletal size" or height or anthropometric* or apgar or adipos* or ph or base n2 excess or metabolic or acidosis or insulin or diabet* or hyperbilirubin#emi*) )

S6 ( birth or delivery) n3 (trauma or injur* or defect*) or dystocia or nicu or "neonatal intensive care" or "brachial plexus" ) OR ( (neonat* or infant* or newborn*) and ("ponderal index" or skinfold or bmi or body mass index) ) OR ( "cerebral palsy" or "neural tube defect*" or "spina bifida" or anencephal* or encephalocele* or iniencephal* or "spinal dyraphism" or diastematomyel* or lipomingocele* or lipmyelomeningocele* or meningomyelocele* or "cleft palate*" or "cleft lip*" )

S7 ( (development* or learning or intellectual* or cognitive* or language or communication or speech or motor) n2 (disorder* or disab* or delay*) ) OR ( "behavio#r disorder*" or "attention deficit" or autis* or asperger* or "child development" or "developmental milestone*" or neurodevelopment* or "cognitive development" or "motor development" or "motor skill*" or "psychosocial development" or "chronic disease*" or "chronic illness*" or cardiovascular or cardiometabolic or diabet* or "heart disease*" ) OR ( (child* or p#ediatric) n2 (obes* or overweight) )

S8 S4 OR S5 OR S6 OR S7

S9 S3 AND S8

Scopus

((TITLE-ABS-KEY( fetus or fetal or foetus or foetal or "intrauterine growth" or iugr) OR TITLE-ABS-KEY((placenta* or uteroplacenta* or "maternal fetal" or "maternal foetal" or fetomaternal or foetomaternal or transplacental) w/2 transfusion)) or (TITLE-ABS-KEY((fetal or foetal or fetus or foetus) w/2 (response or matur*))) or (TITLE-ABS-KEY ( ( ( uterine OR uterus ) W/2 ( "blood flow" OR circulat* ) ) OR ( ( uterine OR umbilical OR "mid* cerebral" ) W/2 doppler ) OR "intrauterine growth" OR iugr )) or (TITLE-ABS-KEY((fetal or foetal or fetus or foetus or neonat* or newborn or infant) and (growth or develop* or viability or viable or weight or wellbeing or "well being" or health or heart rate or heartrate or bradycardia or hypoxi* or hypoglycemi* or hypoglycaemi* or movement or oxygenation))) or (TITLE-ABS-KEY("still birth" or stillbirth or ((preterm or "pre matur*" or prematur* or "post matur*" or postmatur*) w/2 (birth or childbirth or labor or labour or infant* or newborn* or neonat*))) OR TITLE-ABS-KEY(( "birth weight" or birthweight or macrosomia or "gestational age" or lga or sga ) ) OR TITLE-ABS-KEY(((neonatal or newborn* or infant* or fetus or fetal or foetus or foetal) and (fat* or "abdominal circumference" or "body composition" or bmi or "body mass index" or "waist circumference" or "skeletal size" or height or anthropometric* or apgar or adipos* or ph or "base excess" or metabolic or acidosis or insulin or diabet* or hyperbilirubinemi* or hyperbilirubinaemi*)))) or (TITLE-ABS-KEY((perinatal or fetal or fetus or foetal or foetus or neonat* or newborn* or infant*) W/3 (mortality or morbidity or death or outcome* or complication*) )) or (TITLE-ABS-KEY((( birth or delivery) w/3 (trauma or injur* or defect*)) or dystocia or nicu or "neonatal intensive care" or "brachial plexus" ) OR TITLE-ABS-KEY(( (neonat* or infant* or newborn*) and ("ponderal index" or skinfold or bmi or body mass index) ) ) OR TITLE-ABS-KEY("cerebral palsy" or "neural tube defect*" or "spina bifida" or anencephal* or encephalocele* or iniencephal* or "spinal dyraphism" or diastematomyel* or lipomingocele* or lipmyelomeningocele* or meningomyelocele* or "cleft palate*" or "cleft lip" )) or (TITLE-ABS-KEY(( (development* or learning or intellectual* or cognitive* or language or communication or speech or motor) w/2 (disorder* or disab* or delay*) )) OR TITLE-ABS-KEY("behavior disorder*" or "behaviour disorder*" or "attention deficit" or autis* or asperger* or "child development" or "developmental milestone*" or neurodevelopment* or "cognitive development" or "motor development" or "motor skill*" or "psychosocial development" or "chronic disease*" or cardiovascular or cardiometabolic or diabet* or "heart disease*") OR TITLE-ABS-KEY(( (child* or pediatric or paediatric) w/2 (obes* or overweight) )))) and ((TITLE( exercise* OR "physical* activ*" OR "strenuous activit*" OR "physical inactiv*" OR sedentary OR running OR plyometric* OR yoga OR "tai chi" OR "weight training" OR "resistance training" OR swim* OR sport* OR athlet* OR walk OR walking OR "muscle strengthening" OR "muscle conditioning" OR "muscular conditioning" OR "weight lifting" OR "lifting weight*" )) AND (TITLE-ABS-KEY ( pregnan* or antenatal or prenatal or perinatal or postnatal or prepartum or antepartum or postpartum or "pre partum" or "ante partum" or "post partum" or puerper* or primigravid* or primiparous or multiparous or nulliparous or multigravid* or trimester* or obstetric*))) AND NOT TITLE-ABS-KEY(rat or rats or mouse or mice or cow or cows or bovine or cattle or sheep or ewe*)

Web of Science Core Collection (including Emerging Sources Citation Index)

#1 TI=(exercise* or "physical* activ*" or "strenuous activit*" or "physical inactiv*" or sedentary or running or plyometric* or yoga or "tai chi" or "weight training" or "resistance training" or swim* or sport* or athlet* or walk or walking or (muscle* or muscular or strength) near/2 conditioning or weight* near/2 lift*)

#2 TS=(pregnan* or antenatal or prenatal or perinatal or postnatal or prepartum or antepartum or postpartum or pre partum or ante partum or post partum or puerper* or primigravid* or primiparous or multiparous or nulliparous or multigravid* or trimester* or obstetric*)

#3 #1 AND #2

#4 TI=(f$etus or f$etal) or TS=(placenta* or uteroplacenta* or ("maternal f$etal" or f$etomaternal or transplacental) near/2 (transfusion or exchange) or (f$etal or f$etus) near/2 (response or matur*) )

#5 TS=((f$etal or f$etus or neonat* or newborn or infant) near/3 (growth or develop* or viability or viable or weight or wellbeing or "well being" or health or "heart rate" or heartrate or bradycardia or hypoxi* or hypoglyc$emi* or movement or oxygenation) OR (uterine or uterus) near/2 ("blood flow" or "circulat*") or ((uterine or umbilical or "mid* cerebral") near/2 doppler) OR "intrauterine growth" or iugr )

#6 TS=( (perinatal or f$etal or f$etus or neonat* or newborn* or infant*) near/3 (mortality or morbidity or death or outcome* or complication*) OR "still birth" or stillbirth OR "birth weight" or birthweight or macrosomia or "gestational age" or lga or sga )

#7 TS=( (perinatal or f$etal or f$etus or neonat* or newborn* or infant*) near/3 (mortality or morbidity or death or outcome* or complication*) OR "still birth" or stillbirth or (preterm or "pre matur*" or prematur* or "post matur*" or postmatur*) near/2 (birth or childbirth or labo$r or infant* or newborn* or neonat*) OR "birth weight" or birthweight or macrosomia or gestational age or lga or sga OR (neonatal or newborn* or infant* or f$etus or f$etal) and (fat* or "abdominal circumference" or "body composition" or bmi or "body mass index" or "waist circumference" or "skeletal size" or height or anthropometric* or apgar or adipos* or ph or base near/2 excess or metabolic or acidosis or insulin or diabet* or hyperbilirubin$emi*))

#8 TS=((birth or delivery) near/3 (trauma or injur* or defect*) or dystocia or nicu or "neonatal intensive care" or "brachial plexus" OR ( (neonat* or infant* or newborn*) and (ponderal index or skinfold or bmi or body mass index) ) OR "cerebral palsy" or "neural tube defect*" or "spina bifida" or anencephal* or encephalocele* or iniencephal* or "spinal dyraphism" or diastematomyel* or lipomingocele* or lipmyelomeningocele* or meningomyelocele* or "cleft palate*" or "cleft lip*" )

#9 TS=( (development* or learning or intellectual* or cognitive* or language or communication or speech or motor) near/2 (disorder* or disab* or delay*) OR "behavio$r disorder*" or "attention deficit" or autis* or asperger* or "child development" or "developmental milestone*" or neurodevelopment* or "cognitive development" or "motor development" or "motor skill*" or "psychosocial development" or "chronic disease*" or "chronic illness*" or cardiovascular or cardiometabolic or diabet* or "heart disease*" OR (child* or p$ediatric) near/2 (obes* or overweight) )

#10 #9 OR #8 OR #7 OR #6 OR #5 OR #4

#11 #3 AND #10

#12 TS=(rat or rats or mouse or mice or cow or cows or bovine or cattle or sheep or ewe*)

#13 #11 NOT #12

Clinicatrials.gov

(exercise OR "physical activity" ) AND (antenatal OR prenatal OR perinatal OR postnatal OR prepartum OR antepartum OR postpartum OR "pre partum" OR fetus OR foetus OR fetal OR foetal)

(exercise OR "physical activity" ) AND ("ante partum" OR "post partum" OR puerper* OR primigravida OR primiparous OR multiparous OR nulliparous OR multigravida OR trimester OR trimesters OR obstetric)

TRIP

title(exercise OR "physical activity" ) AND title(pregnan* or antenatal OR prenatal OR perinatal OR postnatal OR prepartum OR antepartum OR postpartum OR "pre partum" OR fetus OR foetus OR fetal OR foetal)

**5) References excluded with reasons**

| No outcome of interest |
| --- |
| **A. A. Amaeze, M. T. Anasonye, U. O. Abaraogu, S. E. Igwe and U. A. C. Okafor.** Birth weight does not associate with gestational physical activity profile: A retrospective cohort study. *African Journal for Physical, Health Education, Recreation & Dance.* 2015. 21:860-868 |
| **A. A. Johnson, E. M. Knight, C. H. Edwards, et al.** Selected lifestyle practices in urban African American women--relationships to pregnancy outcome, dietary intakes and anthropometric measurements. *J.Nutr.* 1994. 124:963S-972S |
| **A. A. Johnson, E. M. Knight, C. H. Edwards, et al.** Selected lifestyle practices in urban African American women--relationships to pregnancy outcome, dietary intakes and anthropometric measurements. 1994. 124:963S-972S |
| **A. Alegre, F. J. Rodriguez-Escudero, E. Cruz and M. Prada.** Influence of work during pregnancy on fetal weight. 1984. 29:334-336 |
| **A. Alegre, F. Rodriguez-Escudero, E. Cruz and M. Prada.** Influence of work during pregnancy on fetal weight. *J.Reprod.Med.* 1984. 29:334-336 |
| **A. B. Granath, M. S. Hellgren and R. K. Gunnarsson.** Water aerobics reduces sick leave due to low back pain during pregnancy. *Journal of obstetric, gynecologic, and neonatal nursing : JOGNN.* 2006. 35:465-471 |
| **A. Bener and N. M. Saleh.** The impact of socio-economic, lifestyle habits, and obesity in developing of pregnancy-induced hypertension in fast-growing country: global comparisons. 2013. 40:52-57 |
| **A. Bergmann, M. Zygmunt and J. F. Clapp 3.** Running throughout pregnancy: effect on placental villous vascular volume and cell proliferation. *Placenta.* 2004. 25:694-698 |
| **A. Bertolotto, L. Volpe, A. Calianno, et al.** Physical activity and dietary habits during pregnancy: effects on glucose tolerance. *Journal of Maternal-Fetal & Neonatal Medicine.* 2010. 23:1310-1314 |
| **A. Bertolotto, L. Volpe, A. Calianno, et al.** Physical activity and dietary habits during pregnancy: effects on glucose tolerance. 2010. 23:1310-1314 |
| **A. Besnier, P. Therme and T. Marqueste.** Influence of physical activity and sports practice before and during pregnancy on the development of gestational diabetes. *Revue Sage - Femme.* 2015. |
| **A. Besnier, P. Therme and T. Marqueste.** Influence of physical activity and sports practice before and during pregnancy on the development of gestational diabetes. 2015. |
| **A. Besnier, P. Therme and T. Marqueste.** Influence of physical activity and sports practice before and during pregnancy on the development of gestational diabetes. *Revue Sage - Femme.* 2015. 14:179-189 |
| **A. Bonen, P. Campagna, L. Gilchrist, D. C. Young and P. Beresford.** Substrate and endocrine responses during exercise at selected stages of pregnancy. *J.Appl.Physiol.* 1992. 73:134-142 |
| **A. Bonen, P. Campagna, L. Gilchrist, D. C. Young and P. Beresford.** Substrate and endocrine responses during exercise at selected stages of pregnancy. 1992. 73:134-142 |
| **A. Bonen, P. D. Campagna, L. Gilchrist and P. Beresford.** Substrate and hormonal responses during exercise classes at selected stages of pregnancy. *Canadian Journal of Applied Physiology.* 1995. 20:440-451 |
| **A. Bonen, P. D. Campagna, L. Gilchrist and P. Beresford.** Substrate and hormonal responses during exercise classes at selected stages of pregnancy. 1995. 20:440-451 |
| **A. Bowen, N. Stewart, M. Baetz and N. Muhajarine.** Antenatal depression in socially high-risk women in Canada. 2009. 63:414-416 |
| **A. Bugalho, A. Bacci and S. Bergstrom.** Risk factors in Mozambican women with eclampsia: a case-referent study. 2001. 5:30-35 |
| **A. C. Hackney, V. L. Katz, W. J. Watson, M. M. Gall and R. G. McMurray.** Alpha-fetoprotein, prolactin and cortisol responses to maximal exercise during pregnancy. *Scandinavian Journal of Medicine and Science in Sports.* 1993. 3:41-45 |
| **A. C. Hackney, V. L. Katz, W. J. Watson, M. M. Gall and R. G. McMurray.** Alpha-fetoprotein, prolactin and cortisol responses to maximal exercise during pregnancy. 1993. 3:41-45 |
| **A. Chiolero, G. Paradis and J. S. Kaufman.** Assessing the possible direct effect of birth weight on childhood blood pressure: a sensitivity analysis. *Am.J.Epidemiol.* 2014. 179:4-11 |
| **A. Coban, G. G. Arslan, A. Colakfakioglu and A. Sirlan.** Impact on quality of life and physical ability of pregnancy-related back pain in the third trimester of pregnancy. 2011. 61:1122-1124 |
| **A. Coxon and J. W. Haggith.** The effects of abdominal decompression on vascular haemodynamics in pregnancy and labour. *Journal of Obstetrics & Gynaecology of the British Commonwealth.* 1971. 78:49-54 |
| **A. Croteau, S. Marcoux and C. Brisson.** Work activity in pregnancy, preventive measures, and the risk of delivering a small-for-gestational-age infant. *Am.J.Public Health.* 2006. 96:846-855 |
| **A. Croteau, S. Marcoux and C. Brisson.** Work activity in pregnancy, preventive measures, and the risk of delivering a small-for-gestational-age infant. 2006. 96:846-855 |
| **A. D. Larsen, H. Hannerz, M. Juhl, et al.** Psychosocial job strain and risk of adverse birth outcomes: A study within the Danish national birth cohort. 2013. 70:845-851 |
| **A. D. McDonald, B. Armstrong and N. M. Cherry.** Spontaneous abortion and occupation. *Journal of Occupational Medicine.* 1986. 28:1232-1238 |
| **A. D. McDonald, B. Armstrong and N. M. Cherry.** Spontaneous abortion and occupation. 1986. 28:1232-1238 |
| **A. D. McDonald, J. C. McDonald, B. Armstrong, et al.** Fetal death and work in pregnancy. 1988. 45:148-157 |
| **A. D. McDonald, J. C. McDonald, B. Armstrong, et al.** PMC1007961; Fetal death and work in pregnancy. *Br.J.Ind.Med.* 1988. 45:148-157 |
| **A. D. McDonald, J. C. McDonald, B. Armstrong, N. M. Cherry, A. D. Nolin and D. Robert.** Prematurity and work in pregnancy. *Br.J.Ind.Med.* 1988. 45:56-62 |
| **A. D. McDonald, J. C. McDonald, B. Armstrong, N. M. Cherry, A. D. Nolin and D. Robert.** Prematurity and work in pregnancy. 1988. 45:56-62 |
| **A. D. Stein, J. M. Rivera and J. M. Pivarnik.** Measuring energy expenditure in habitually active and sedentary pregnant women. *Med.Sci.Sports Exerc.* 2003. 35:1441-1446 |
| **A. Dinc, N. Kizilkaya Beji and O. Yalcin.** Effect of pelvic floor muscle exercises in the treatment of urinary incontinence during pregnancy and the postpartum period. *Int.Urogynecol.J.Pelvic Floor Dysfunct.* 2009. 20:1223-1231 |
| **A. Dinc, N. Kizilkaya Beji and O. Yalcin.** Effect of pelvic floor muscle exercises in the treatment of urinary incontinence during pregnancy and the postpartum period. 2009. 20:1223-1231 |
| **A. E. Beddoe, C. P. P. Yang, H. P. Kennedy, S. J. Weiss and K. A. Lee.** The Effects of Mindfulness-Based Yoga During Pregnancy on Maternal Psychological and Physical Distress. *Jognn-Journal of Obstetric Gynecologic and Neonatal Nursing.* 2009. 38:310-319 |
| **A. E. Beddoe, C. P. Paul Yang, H. P. Kennedy, S. J. Weiss and K. A. Lee.** The effects of mindfulness-based yoga during pregnancy on maternal psychological and physical distress. 2009. 38:310-319 |
| **A. E. Beddoe, K. A. Lee, S. J. Weiss, H. P. Kennedy and C. P. Yang.** Effects of mindful yoga on sleep in pregnant women: a pilot study. 2010. 11:363-370 |
| **A. E. Montpetit, H. Plourde, T. R. Cohen and K. G. Koski.** Modeling the impact of prepregnancy BMI, physical activity, and energy intake on gestational weight gain, infant birth weight, and postpartum weight retention. *Journal of Physical Activity & Health.* 2012. 9:1020-1029 |
| **A. E. Ruifrok, E. Althuizen, N. Oostdam, et al.** PMC4189770; The relationship of objectively measured physical activity and sedentary behaviour with gestational weight gain and birth weight. *Journal of Pregnancy.* 2014. 2014:567379 |
| **A. ElDeeb, A. A. Sabbour, K. Abd-Ghafar and W. A. Ayad.** Effect of Stabilizing Exercises Augmented by Pelvic Floor Training on Postpartum Low Back Pain. *Journal of Womens Health.* 2016. 25:A11 |
| **A. F. Adeniyi and O. O. Ogwumike.** Physical activity and energy expenditure: findings from the Ibadan Pregnant Women's Survey. 2014. 18:117-126 |
| **A. F. Robledo-Colonia, N. Sandoval-Restrepo, Y. F. Mosquera-Valderrama, C. Escobar-Hurtado and R. Ramirez-Velez.** Aerobic exercise training during pregnancy reduces depressive symptoms in nulliparous women: a randomised trial. 2012. 58:9-15 |
| **A. F. Saftlas, N. Logsden-Sackett, W. Wang, R. Woolson and M. B. Bracken.** Work, leisure-time physical activity, and risk of preeclampsia and gestational hypertension. *Am.J.Epidemiol.* 2004. 160:758-765 |
| **A. F. Saftlas, N. Logsden-Sackett, W. Wang, R. Woolson and M. B. Bracken.** Work, leisure-time physical activity, and risk of preeclampsia and gestational hypertension. 2004. 160:758-765 |
| **A. Fast, L. Weiss, E. J. Ducommun, E. Medina and J. G. Butler.** Low-back pain in pregnancy. Abdominal muscles, sit-up performance, and back pain. 1990. 15:28-30 |
| **A. Ferrara, M. M. Hedderson, C. L. Albright, et al.** A pregnancy and postpartum lifestyle intervention in women with gestational diabetes mellitus reduces diabetes risk factors: a feasibility randomized control trial. 2011. 34:1519-1525 |
| **A. Fraser, K. Tilling, C. Macdonald-Wallis, et al.** Associations of gestational weight gain with maternal body mass index, waist circumference, and blood pressure measured 16 y after pregnancy: The Avon Longitudinal Study of Parents and Children (ALSPAC). *Am.J.Clin.Nutr.* 2011. 93:1285-1292 |
| **A. Fraser, K. Tilling, C. Macdonald-Wallis, et al.** Associations of gestational weight gain with maternal body mass index, waist circumference, and blood pressure measured 16 y after pregnancy: the Avon Longitudinal Study of Parents and Children (ALSPAC). 2011. 93:1285-1292 |
| **A. G. Cramp and L. R. Brawley.** Moms in motion: a group-mediated cognitive-behavioral physical activity intervention. 2006. 3:23 |
| **A. G. Cramp and S. R. Bray.** Pre- and postnatal women's leisure time physical activity patterns: a multilevel longitudinal analysis. 2009. 80:403-411 |
| **A. G. El-Metwalli, A. M. Badawy, L. A. El-Baghdadi and A. El-Wehady.** Occupational physical activity and pregnancy outcome. 2001. 100:41-45 |
| **A. Gaston and C. A. Vamos.** Leisure-time physical activity patterns and correlates among pregnant women in Ontario, Canada. *Maternal & Child Health Journal.* 2013. 17:477-484 |
| **A. Gaston and C. A. Vamos.** Leisure-time physical activity patterns and correlates among pregnant women in Ontario, Canada. 2013. 17:477-484 |
| **A. Gaston and C. A. Vamos.** Leisure-time physical activity patterns and correlates among pregnant women in Ontario, Canada. *Matern.Child Health J.* 2013. 17:477-484 |
| **A. Gaston and H. Prapavessis.** Tired, moody and pregnant? Exercise may be the answer. 2013. 28:1353-1369 |
| **A. Gaston and H. Prapavessis.** Using a combined protection motivation theory and health action process approach intervention to promote exercise during pregnancy. 2014. 37:173-184 |
| **A. Gaston, A. G. Cramp and H. Prapavessis.** Pregnancy--should women put up their feet or lace up their running shoes?: Self-presentation and the exercise stereotype phenomenon during pregnancy. 2012. 34:223-237 |
| **A. Gollenberg, P. Pekow, G. Markenson, K. L. Tucker and L. Chasan-Taber.** Dietary behaviors, physical activity, and cigarette smoking among pregnant Puerto Rican women. *Am.J.Clin.Nutr.* 2008. 87:1844-1851 |
| **A. Gollenberg, P. Pekow, G. Markenson, K. L. Tucker and L. Chasan-Taber.** Dietary behaviors, physical activity, and cigarette smoking among pregnant Puerto Rican women. 2008. 87:1844-1851 |
| **A. Gollenberg, P. Pekow, G. Markenson, K. L. Tucker and L. Chasan-Taber.** Dietary behaviors, physical activity, and cigarette smoking among pregnant Puerto Rican women. *Am.J.Clin.Nutr.* 2008. 87:1844-1851 |
| **A. Goodwin, J. Astbury and J. McMeeken.** Body image and psychological well-being in pregnancy. A comparison of exercisers and non-exercisers. *Australian and New Zealand Journal of Obstetrics and Gynaecology.* 2000. 40:442-447 |
| **A. Goodwin, J. Astbury and J. McMeeken.** Body image and psychological well-being in pregnancy. A comparison of exercisers and non-exercisers. 2000. 40:442-447 |
| **A. Goodwin, J. Astbury and J. McMeeken.** Pregnancy: Does it change exercise participation?. 2000. 6:15-26 |
| **A. Gradmark, J. Pomeroy, F. Renstrom, et al.** Physical activity may offset pregnancy-related insulin resistance. *Diabetologia.* 2010. 53:S276 |
| **A. Gradmark, J. Pomeroy, F. Renstrom, et al.** Physical activity, sedentary behaviors, and estimated insulin sensitivity and secretion in pregnant and non-pregnant women. 2011. 11:44 |
| **A. Gradmark, J. Pomeroy, F. Renstrom, et al.** PMC3130709; Physical activity, sedentary behaviors, and estimated insulin sensitivity and secretion in pregnant and non-pregnant women. *BMC Pregnancy & Childbirth.* 2011. 11:44 |
| **A. Gutke, H. C. Ostgaard and B. Oberg.** Predicting persistent pregnancy-related low back pain. 2008. 33:E386-93 |
| **A. Hart, N. Morris, S. B. Osborn and H. P. Wright.** Source: CLML. 5731:14586; Effective uterine bloodflow during exercise in normal and pre-eclamptic pregnancies. *Lancet.* 1956. 271:481-484 |
| **A. Himmelmann, A. Svensson, L. Sigstrom and L. Hansson.** Predictors of blood pressure and left ventricular mass in the young: the Hypertension in Pregnancy Offspring Study. *American Journal of Hypertension.* 1994. 7:381-389 |
| **A. Hui, L. Back, S. Ludwig, et al.** Exercise and dietary intervention increases physical activity, promotes healthy diet and reduces excessive gestational weight gain in pregnant women: A randomized controlled trial in Urban community. *Diabetes.* 2011. 60:A351 |
| **A. Hui, L. Back, S. Ludwig, et al.** Lifestyle intervention on diet and exercise reduced excessive gestational weight gain in pregnant women under a randomised controlled trial. *Bjog-an International Journal of Obstetrics and Gynaecology.* 2012. 119:70-77 |
| **A. J. Agopian, P. J. Lupo, M. A. Canfield, L. E. Mitchell and Defects Prevention National Birth.** Swimming pool use and birth defect risk. *American Journal of Obstetrics & Gynecology.* 2013. 209:219.e1-219.e9 |
| **A. J. Agopian, P. J. Lupo, M. A. Canfield, L. E. Mitchell and National Birth Defects Prevention, Study.** Swimming pool use and birth defect risk. 2013. 209:219.e1-219.e9 |
| **A. J. Martin Campillo.** Desarrollo motor del periodo prenatal al primer ano de vida, relacion conla Natacion. / Motor development from the prenatal period to the first year of life, relationship with Swimming. *Comunicaciones Tecnicas.* 1992. 5-19 |
| **A. Jakobovits.** The effect of maternal physical activity on fetal breathing movements. *Arch.Gynecol.* 1983. 234:47-48 |
| **A. Jayasudha.** Effect of antenatal exercises on labour outcome among primigravid mothers. *Nurs.J.India.* 2013. 104:10-13 |
| **A. Jayasudha.** Effect of antenatal exercises on labour outcome among primigravid mothers. 2013. 104:10-13 |
| **A. Jukic, K. Evenson, J. Daniels, A. H. Herring, A. Wilcox and K. Hartmann.** A prospective study of the association between vigorous physical activity during pregnancy and length of gestation and birthweight. *Am.J.Epidemiol.* 2010. 171:S33 |
| **A. K. Ertan, S. Schanz, H. A. Tanriverdi, R. Meyberg and W. Schmidt.** Doppler examinations of fetal and uteroplacental blood flow in AGA and IUGR fetuses before and after maternal physical exercise with the bicycle ergometer. *J.Perinat.Med.* 2004. 32:260-265 |
| **A. K. Jenum, K. R. Richardsen, S. Berntsen and K. Morkrid.** Gestational diabetes, insulin resistance and physical activity in pregnancy in a multi-ethnic population - a public health perspective. 2013. 23:45-54 |
| **A. K. Ronnberg, I. Ostlund, H. Fadl, T. Gottvall and K. Nilsson.** Intervention during pregnancy to reduce excessive gestational weight gain-a randomised controlled trial. 2015. 122:537-544 |
| **A. Karabulut, A. U. Derbent, M. Yildirim, S. Simavli and N. O. Turhan.** Evaluation of risk factors and effect of physical activity in caesarean section in nulliparous women. *Journal of Maternal-Fetal & Neonatal Medicine.* 2012. 25:1456-1459 |
| **A. Karabulut, A. U. Derbent, M. Yildirim, S. Simavli and N. O. Turhan.** Evaluation of risk factors and effect of physical activity in caesarean section in nulliparous women. 2012. 25:1456-1459 |
| **A. Kariminia, M. E. Chamberlain, J. Keogh and A. Shea.** PMC351839; Randomised controlled trial of effect of hands and knees posturing on incidence of occiput posterior position at birth. *BMJ.* 2004. 328:490 |
| **A. Kerssen, H. W. de Valk and G. H. Visser.** Day-to-day glucose variability during pregnancy in women with Type 1 diabetes mellitus: glucose profiles measured with the Continuous Glucose Monitoring System. 2004. 111:919-924 |
| **A. Khaledan, S. Mirdar, N. S. Motahari Tabari and M. A. Shirvani.** Effect of an Aerobic Exercise Program on Fetal Growth in Pregnant Women. *HAYAT.* 2010. 16:55-64 10p |
| **A. L. Brearley, M. Sherburn, M. P. Galea and S. J. Clarke.** Pregnant women maintain body temperatures within safe limits during moderate-intensity aqua-aerobic classes conducted in pools heated up to 33 degrees Celsius: an observational study. 2015. 61:199-203 |
| **A. L. Deierlein, A. M. Siega-Riz and A. Herring.** Dietary energy density but not glycemic load is associated with gestational weight gain. 2008. 88:693-699 |
| **A. L. Deierlein, A. M. Siega-Riz and K. R. Evenson.** Physical activity during pregnancy and risk of hyperglycemia. 2012. 21:769-775 |
| **A. L. Deierlein, A. Siega-Riz and K. R. Evenson.** PMC3387759; Physical activity during pregnancy and risk of hyperglycemia. *Journal of Women's Health.* 2012. 21:769-775 |
| **A. L. Gollenberg, P. Pekow, E. Bertone-Johnson, P. S. Freedson, G. Markenson and L. Chasan-Taber.** Physical activity and risk of small-for-gestational-age birth among predominantly Puerto Rican women. *Maternal & Child Health Journal.* 2011. 15:49-59 |
| **A. L. Gollenberg, P. Pekow, E. R. Bertone-Johnson, P. S. Freedson, G. Markenson and L. Chasan-Taber.** Sedentary behaviors and abnormal glucose tolerance among pregnant Latina women. 2010. 42:1079-1085 |
| **A. L. Hui, L. Back, A. Reid, et al.** Effects of physical activity and dietary intakes on weight gain of pregnant women with normal and above normal prepregnancy weight. *Canadian Journal of Diabetes.* 2012. 1):S8 |
| **A. L. Hui, L. Back, S. Ludwig, et al.** PMC4287470; Effects of lifestyle intervention on dietary intake, physical activity level, and gestational weight gain in pregnant women with different pre-pregnancy Body Mass Index in a randomized control trial. *BMC Pregnancy & Childbirth.* 2014. 14:331 |
| **A. L. Hui, S. Ludwig, P. Gardiner, et al.** Exercise and dietary intervention during pregnancy results in reduced excessive gestational weight gain. *Diabetes.* 2010. Conference Publication: (var.pagings).: |
| **A. L. Hui, S. M. Ludwig, P. Gardiner, et al.** Community-based exercise and dietary intervention during pregnancy: A pilot study. *Canadian Journal of Diabetes.* 2006. 30:169-175 |
| **A. L. Vallim, M. J. Osis, J. G. Cecatti, E. P. Baciuk, C. Silveira and S. R. Cavalcante.** PMC3113331; Water exercises and quality of life during pregnancy. *Reproductive Health.* 2011. 8:14 |
| **A. L. Vallim, M. J. Osis, J. G. Cecatti, E. P. Baciuk, C. Silveira and S. R. Cavalcante.** Water exercises and quality of life during pregnancy. 2011. 8:14 |
| **A. Lee, J. Karpavicius, E. Gasparini and D. Forster.** Implementing a diet and exercise program for limiting maternal weight gain in obese pregnant women: A pilot study. *Australian and New Zealand Journal of Obstetrics and Gynaecology.* 2012. 52:427-432 |
| **A. Lee, J. Karpavicius, E. Gasparini and D. Forster.** Implementing a diet and exercise program for limiting maternal weight gain in obese pregnant women: a pilot study. 2012. 52:427-432 |
| **A. Lemos, A. I. de Souza, J. N. Figueiroa, J. E. Cabral-Filho and A. D. de Andrade.** Respiratory muscle strength in pregnancy. 2010. 104:1638-1644 |
| **A. Lewkowitz, B. O'Donnell, S. Nakagawa, J. Vargas, Y. Cheng and M. Zlatnik.** Social media messaging in pregnancy: How Text4Baby compares to popular smart phone applications. *Obstet.Gynecol.* 2014. 1):S249-S250 |
| **A. Liquori, G. Widener and L. Clark.** Effects of a 6-week prenatal water exercise program on physiological parameters and well-being in women with pregnancies in the 2nd-3rd trimesters: a pilot study. *Journal of the Section on Women's Health.* 2003. 27:11-19 9p |
| **A. Liquori, G. Widener and L. Clark.** Effects of a 6-week prenatal water exercise program on physiological parameters and well-being in women with pregnancies in the 2nd-3rd trimesters: a pilot study. 2003. 27:11-19 9 |
| **A. Lynch, C. Goodman, P. L. Choy, et al.** Maternal physiological responses to swimming training during the second trimester of pregnancy. *Research in Sports Medicine.* 2007. 15:33-45 13p |
| **A. M. Jukic, D. A. Lawlor, M. Juhl, et al.** Physical activity during pregnancy and language development in offspring. *Am.J.Epidemiol.* 2012. 175:S76 |
| **A. M. Jukic, K. R. Evenson, A. H. Herring, A. J. Wilcox, K. E. Hartmann and J. L. Daniels.** NIHMS494001 PMC3749786; Correlates of physical activity at two time points during pregnancy. *Journal of Physical Activity & Health.* 2012. 9:325-335 |
| **A. M. Lynch, C. Goodman, P. L. Choy, et al.** Maternal physiological responses to swimming training during the second trimester of pregnancy. 2007. 15:33-45 |
| **A. M. Lynch, S. McDonald, E. F. Magann, et al.** Effectiveness and safety of a structured swimming program in previously sedentary women during pregnancy. *Journal of Maternal-Fetal & Neonatal Medicine.* 2003. 14:163-169 |
| **A. M. Paolone, M. Shangold, D. Paul, J. Minnitti and S. Weiner.** Fetal heart rate measurement during maternal exercise--avoidance of artifact. *Medicine & Science in Sports & Exercise.* 1987. 19:605-609 |
| **A. M. Petersen, T. L. Leet and R. C. Brownson.** Correlates of physical activity among pregnant women in the United States. *Medicine & Science in Sports & Exercise.* 2005. 37:1748-1753 6p |
| **A. M. Petersen, T. L. Leet and R. C. Brownson.** Correlates of physical activity among pregnant women in the United States. 2005. 37:1748-1753 |
| **A. M. Stuebe, E. Oken and M. W. Gillman.** Associations of diet and physical activity during pregnancy with risk for excessive gestational weight gain. *Am.J.Obstet.Gynecol.* 2009. 201:58.e1-58.e8 |
| **A. M. Stuebe, E. Oken, M. W. Gillman, Alison M. Stuebe, Emily Oken and Matthew W. Gillman.** Associations of diet and physical activity during pregnancy with risk for excessive gestational weight gain. *American Journal of Obstetrics & Gynecology.* 2009. 201:58.e8 |
| **A. M. Wallace, D. B. Boyer, A. Dan and K. Holm.** Aerobic exercise, maternal self-esteem, and physical discomforts during pregnancy. 1986. 31:255-262 |
| **A. M. Z. Jukic, K. R. Evenson, A. H. Herring, A. J. Wilcox, K. E. Hartmann and J. L. Daniels.** Correlates of physical activity at two time points during pregnancy. 2012. 9:325-335 |
| **A. MacPhail, G. A. Davies, R. Victory and L. A. Wolfe.** Maximal exercise testing in late gestation: fetal responses. *Obstetrics & Gynecology.* 2000. 96:565-570 |
| **A. McGiveron, S. Foster, J. Pearce, M. A. Taylor, S. McMullen and S. Langley-Evans.** Limiting antenatal weight gain improves maternal health outcomes in severely obese pregnant women: findings of a pragmatic evaluation of a midwife-led intervention. *Journal of Human Nutrition & Dietetics.* 2015. 28 Suppl 1:29-37 |
| **A. Merkx, M. Ausems, L. Bude, R. de Vries and M. J. Nieuwenhuijze.** Weight gain in healthy pregnant women in relation to pre-pregnancy BMI, diet and physical activity. *Midwifery.* 2015. 31:693-701 |
| **A. Merkx, M. Ausems, L. Bude, R. de Vries and M. J. Nieuwenhuijze.** Weight gain in healthy pregnant women in relation to pre-pregnancy BMI, diet and physical activity. 2015. 31:693-701 |
| **A. Murtezani, M. Pacarada, Z. Ibraimi, A. Nevzati and N. Abazi.** The impact of exercise during pregnancy on neonatal outcomes: a randomized controlled trial. *Journal of Sports Medicine & Physical Fitness.* 2014. 54:802-808 |
| **A. Murtezani, M. Pacarada, Z. Ibraimi, A. Nevzati and N. Abazi.** The impact of exercise during pregnancy on neonatal outcomes: a randomized controlled trial. *J.Sports Med.Phys.Fitness.* 2014. 54:802-808 |
| **A. Nakagaki, T. Inami, T. Minoura, R. Baba, S. Iwase and M. Sato.** Differences in autonomic neural activity during exercise between the second and third trimesters of pregnancy. *Journal of Obstetrics & Gynaecology Research.* 2016. 28:28 |
| **A. Nakagaki, T. Inami, T. Minoura, R. Baba, S. Iwase and M. Sato.** Differences in autonomic neural activity during exercise between the second and third trimesters of pregnancy. *Journal of Obstetrics & Gynaecology Research.* 2016. 42:951-959 |
| **A. Nieto, R. Matorras, M. Serra, P. Valenzuela and J. Molero.** Multivariate analysis of determinants of fetal growth retardation. *European Journal of Obstetrics, Gynecology, & Reproductive Biology.* 1994. 53:107-113 |
| **A. Nieto, R. Matorras, M. Serra, P. Valenzuela and J. Molero.** Multivariate analysis of determinants of fetal growth retardation. 1994. 53:107-113 |
| **A. Opala-Berdzik, B. Bacik, A. Markiewicz, et al.** Comparison of static postural stability in exercising and non-exercising women during the perinatal period. *Medical Science Monitor.* 2014. 20:1865-1870 |
| **A. Opala-Berdzik, B. Bacik, A. Markiewicz, et al.** Comparison of static postural stability in exercising and non-exercising women during the perinatal period. 2014. 20:1865-1870 |
| **A. P. Heenan and L. A. Wolfe.** Plasma acid-base regulation above and below ventilatory threshold in late gestation. *J.Appl.Physiol.* 2000. 88:149-157 |
| **A. P. Heenan and L. A. Wolfe.** Plasma acid-base regulation above and below ventilatory threshold in late gestation. 2000. 88:149-157 |
| **A. P. Heenan and L. A. Wolfe.** Plasma osmolality and the strong ion difference predict respiratory adaptations in pregnant and nonpregnant women. 2003. 81:839-847 |
| **A. P. Heenan, L. A. Wolfe and G. A. Davies.** Maximal exercise testing in late gestation: maternal responses. *Obstetrics & Gynecology.* 2001. 97:127-134 |
| **A. P. Heenan, L. A. Wolfe and G. A. Davies.** Maximal exercise testing in late gestation: maternal responses. 2001. 97:127-134 |
| **A. P. Heenan, L. A. Wolfe, G. A. Davies and M. J. McGrath.** Effects of human pregnancy on fluid regulation responses to short-term exercise. *J.Appl.Physiol.* 2003. 95:2321-2327 |
| **A. P. Heenan, L. A. Wolfe, G. A. Davies and M. J. McGrath.** Effects of human pregnancy on fluid regulation responses to short-term exercise. 2003. 95:2321-2327 |
| **A. P. Koemeester, J. P. Broersen and P. E. Treffers.** Physical work load and gestational age at delivery. 1995. 52:313-315 |
| **A. P. Koemeester, J. P. Broersen and P. E. Treffers.** PMC1128222; Physical work load and gestational age at delivery. *Occupational & Environmental Medicine.* 1995. 52:313-315 |
| **A. R. A. Adegboye, S. Rossner, M. Neovius, P. M. C. Lourenço and Y. Linné.** Relationships between prenatal smoking cessation, gestational weight gain and maternal lifestyle characteristics. 2010. 23:29-35 7 |
| **A. Rakhshani, R. Nagarathna, R. Mhaskar, A. Mhaskar, A. Thomas and S. Gunasheela.** PMC4320907; Effects of yoga on utero-fetal-placental circulation in high-risk pregnancy: a randomized controlled trial. *Advances in Preventive Medicine.* 2015. 2015:373041 |
| **A. Rakhshani, S. Maharana, N. Raghuram, H. R. Nagendra and P. Venkatram.** Effects of integrated yoga on quality of life and interpersonal relationship of pregnant women. *Quality of life research.* 2010. 19:1447-1455 |
| **A. Rakhshani, S. Maharana, N. Raghuram, H. R. Nagendra and P. Venkatram.** Effects of integrated yoga on quality of life and interpersonal relationship of pregnant women. 2010. 19:1447-1455 |
| **A. Restall, R. S. Taylor, J. M. Thompson, et al.** PMC4065732; Risk factors for excessive gestational weight gain in a healthy, nulliparous cohort. *Journal of Obesity.* 2014. 2014:148391 |
| **A. Robledo-Colonia, N. Sandoval-Restrepo, Y. Mosquera-Valderrama, C. Escobar-Hurtado and R. Ramirez-Velez.** Aerobic exercise training during pregnancy reduces depressive symptoms in nulliparous women: a randomised trial. *Journal of Physiotherapy.* 2012. 58:9-15 |
| **A. Rodriguez and G. Bohlin.** Psychosocial predictors of smoking and exercise during pregnancy. 2000. 18:203-223 |
| **A. S. Cavalli and T. Tanaka.** PMC2723239; Relationship between maternal physical activities and preterm birth. *Environmental Health & Preventive Medicine.* 2001. 6:74-81 |
| **A. S. Cavalli and T. Tanaka.** PMC2723549; Maternal leisure-time physical activities are not determinant risk factors of low birthweight babies: A cross-sectional study of 1,714 pregnant women. *Environmental Health & Preventive Medicine.* 2000. 5:72-80 |
| **A. S. Tenforde, K. E. Toth, E. Langen, M. Fredericson and K. L. Sainani.** PMC4332642 Available on 03/01/16]; Running habits of competitive runners during pregnancy and breastfeeding. *Sports Health.* 2015. 7:172-176 |
| **A. Sijtsma, P. J. J. Sauer and E. Corpeleijn.** Parental correlations of physical activity and body mass index in young children- the GECKO Drenthe cohort. *International Journal of Behavioral Nutrition and Physical Activity.* 2015. 12: |
| **A. Spinillo, E. Capuzzo, F. Baltaro, G. Piazza, S. Nicola and A. Iasci.** The effect of work activity in pregnancy on the risk of fetal growth retardation. *Acta Obstet.Gynecol.Scand.* 1996. 75:531-536 |
| **A. Spinillo, E. Capuzzo, F. Baltaro, G. Piazza, S. Nicola and A. Iasci.** The effect of work activity in pregnancy on the risk of fetal growth retardation. 1996. 75:531-536 |
| **A. Spinillo, E. Capuzzo, L. Colonna, G. Piazzi, S. Nicola and F. Baltaro.** The effect of work activity in pregnancy on the risk of severe preeclampsia. 1995. 35:380-385 |
| **A. U. Derbent, A. Karabulut, M. Yildirim, S. A. Simavli and N. O. Turhan.** Evaluation of risk factors in cesarean delivery among multiparous women with a history of vaginal delivery. 2012. 13:15-20 |
| **A. V. M. Arizabaleta, L. O. Buitrago, de Plata, A. C. A., M. M. Escudero and R. Ram**. Aerobic exercise during pregnancy improves health-related quality of life: A randomised trial. 2010. 56:253-258 |
| **A. W. Bingham.** The prevention of obstetric complications by diet and exercise. 1932. 23:38-47 |
| **A. Williams, T. Reilly, I. Campbell and J. Sutherst.** Investigation of changes in responses to exercise and in mood during pregnancy. 1988. 31:1539-1549 |
| **A. Wojtyla, L. Kapka-Skrzypczak, P. Bilinski and P. Paprzycki.** Physical activity among women at reproductive age and during pregnancy (Youth Behavioural Polish Survey - YBPS and Pregnancy-related Assessment Monitoring Survay - PrAMS) - epidemiological population studies in Poland during the period 2010-2011. *Annals of Agricultural and Environmental Medicine.* 2011. 18:365-374 |
| **A. Wojtyla, L. Kapka-Skrzypczak, P. Bilinski and P. Paprzycki.** Physical activity among women at reproductive age and during pregnancy (Youth Behavioural Polish Survey - YBPS and Pregnancy-related Assessment Monitoring Survay - PrAMS) - epidemiological population studies in Poland during the period 2010-2011. 2011. 18:365-374 |
| **A. Wojtyla, L. Kapka-Skrzypczak, P. Paprzycki, M. Skrzypczak and P. Bilinski.** Epidemiological studies in Poland on effect of physical activity of pregnant women on the health of offspring and future generations - adaptation of the hypothesis development origin of health and diseases. *Annals of Agricultural & Environmental Medicine.* 2012. 19:315-326 |
| **A. Wojtyla, L. Kapka-Skrzypczak, P. Paprzycki, M. Skrzypczak and P. Bilinski.** Epidemiological studies in Poland on effect of physical activity of pregnant women on the health of offspring and future generations - adaptation of the hypothesis development origin of health and diseases. 2012. 19:315-326 |
| **Akhgar Ghassabian, Rajeshwari Sundaram, Amanda Wylie, Erin Bell, Scott C. Bello and Edwina Yeung.** Maternal medical conditions during pregnancy and gross motor development up to age 24 months in the Upstate KIDS study. *Developmental Medicine & Child Neurology.* 2016. 58:728-734 |
| **Akihito Takeuchi, Takashi Yorifuji, Kyohei Takahashi, et al.** Neurodevelopment in full-term small for gestational age infants: A nationwide japanese population-based study. *Brain Dev.* 2016. 38:529-537 |
| **Alison Tovar, Lauren B. Guthrie, Deborah Platek, Alison Stuebe, Sharon J. Herring and Emily Oken.** Modifiable predictors associated with having a gestational weight gain goal. 2011. 15:1119-1126 |
| **Anca Gaston, Philip M. Wilson, Diane E. Mack, Stephanie Elliot and Harry Prapavessis.** Understanding physical activity behavior and cognitions in pregnant women: An application of self-determination theory. 2013. 14:405-412 |
| **André Michael Toschke, Simon Rückinger, Eva Böhler and Rüdiger Von Kries.** Adjusted population attributable fractions and preventable potential of risk factors for childhood obesity. 2007. 10:902-906 5 |
| **Anja Podlesnik Fetih, Mateja Videmšek, Vislava Globevnik Velikonja, Eda Bokal Vrtačnik and Damir Karpljuk.** The state of mind of less physically active and regularly physically active women in the second trimester of their pregnancies. / duševní stay málo a pravidelnĕ tĕlesnĕ akitvních žen ve druhém tremestru tĕhotenstÍ. 2008. 38:37-44 |
| **Anonymous**. Acute Maternal and Fetal Effects of Exercise in Pregnancy. *Clinical Trials.* 2011. |
| **Anonymous**. Descriptive Epidemiology of Objectively Measured Walking Among US Pregnant Women: National Health and Nutrition Examination Survey, 2005-2006. 2015. 12:1-6 6 |
| **Anonymous**. Effectiveness of Video Messaging About Diet, Exercise and Weight Gain in Pregnancy in Regional and National Samples. *Clinical Trials.* 2015. |
| **Anonymous**. Effects of a Physical Exercise Program on Microcirculation and Pregnancy Outcomes in Obese Pregnant Women. *Clinical Trials.* 2015. |
| **Anonymous**. Effects on postpartum weight retention after antenatal lifestyle intervention - a secondary analysis of a randomized controlled trial. *Acta Obstet.Gynecol.Scand.* 2016. 95:999-1007 |
| **Anonymous**. Exercise in pregnancy does not increase preterm birth risk. *Clinical Advisor.* 2016. 19:16 |
| **Anonymous**. Exercise in Pregnancy Evaluative Controlled Study. *Clinical Trials.* 2015. |
| **Anonymous**. Exercise Training in Pregnancy for Obese Mothers. *Clinical Trials.* 2010. |
| **Anonymous**. Fit For Delivery: A Study of the Effect of Exercise Sessions and Nutritional Counselling on Pregnancy Outcome. *Clinical Trials.* 2009. |
| **Anonymous**. Fitness programs benefit mothers-to-be, heart patients. *Health Prog.* 1985. 66:74-75 |
| **Anonymous**. Maternal condition and exercise during pregnancy benefit the unborn well being and labor. 2008. 26:51-58 8 |
| **Anonymous**. Pelvic floor muscle exercises. 2001. 87:650 |
| **Anonymous**. Pregnant women advised to consider exercise risks. (Les femmes enceintes doivent prendre en compte les dangers du sport). *Physician & Sportsmedicine.* 1982. 10:27 |
| **Anonymous**. Pregnant women who swim at reduced risk of preterm birth. *Nursing Standard.* 2010. 24:17 |
| **Anonymous**. Role of Maternal Physical Exercise on Spontaneous Labor Onset. *Clinical Trials.* 2015. |
| **Anonymous**. What is the effect of regular group exercise on maternal psychological outcomes and common pregnancy complaints? An assessor blinded RCT. 2016. 32:81-86 6 |
| **Arati Mahishale and Shobhana Patted.** Effectiveness of Tailor Made Exercise Intervention for Low Back Pain and Pelvic Pain during Pregnancy - A Randomized Controlled Trial. 2014. 8:143-148 6 |
| **Avaya Banerjee, V. Mahalakshmi and R. Baranitharan.** Effect of Antenatal Exercise Program with and without Abdominal Strengthening Exercises on Diastasis Rectus Abdominis - A Post Partum Follow Up. 2013. 7:123-126 4 |
| **B. A. Lewis, B. C. Martinson, N. E. Sherwood and M. D. Avery.** A pilot study evaluating a telephone-based exercise intervention for pregnant and postpartum women. *J.Midwifery Womens Health.* 2011. 56:127-131 |
| **B. A. Lewis, B. C. Martinson, N. E. Sherwood and M. D. Avery.** A pilot study evaluating a telephone-based exercise intervention for pregnant and postpartum women. 2011. 56:127-131 |
| **B. A. Meyer and J. R. Daling.** Activity level of mother's usual occupation and low infant birth weight. *Journal of Occupational Medicine.* 1985. 27:841-847 |
| **B. A. Meyer and J. R. Daling.** Activity level of mother's usual occupation and low infant birth weight. 1985. 27:841-847 |
| **B. A. Polley, R. R. Wing and C. J. Sims.** Randomized controlled trial to prevent excessive weight gain in pregnant women. 2002. 26:1494-1502 |
| **B. B. Price, S. B. Amini and K. Kappeler.** Exercise in pregnancy: effect on fitness and obstetric outcomes-a randomized trial. *Medicine & Science in Sports & Exercise.* 2012. 44:2263-2269 |
| **B. Banerjee, T. K. Dey and P. Chatterjee.** Estimation of risk of pregnancy wastage due to lifting of heavy weight during pregnancy. *Indian Journal of Occupational and Environmental Medicine.* 2002. 6:13-15 |
| **B. Banerjee, T. K. Dey and P. Chatterjee.** Estimation of risk of pregnancy wastage due to lifting of heavy weight during pregnancy. 2002. 6:13-15 |
| **B. Banerjee, T. K. Dey and P. Chatterjee.** Work related physical exertion and spontaneous abortion. *Indian J.Public Health.* 2005. 49:248-249 |
| **B. Banerjee, T. K. Dey and P. Chatterjee.** Work related physical exertion and spontaneous abortion. 2005. 49:248-249 |
| **B. Bennett and O. D. Ratnoff.** Changes in antihemophilic factor (AHF, factor 8) procoagulant activity and AHF-like antigen in normal pregnancy, and following exercise and pneumoencephalography. *J.Lab.Clin.Med.* 1972. 80:256-263 |
| **B. Chakaravertty, K. Parkavi, S. A. Coumary and A. J. Felix.** Antepartum cardiorespiratory fitness (CRF) quantification by estimation of maximal oxygen consumption (Vo2 max) in pregnant South Indian women. 2012. 110:214-217 |
| **B. Eskenazi, L. Fenster, S. Wight, P. English, G. C. Windham and S. H. Swan.** Physical exertion as a risk factor for spontaneous abortion. 1994. 5:6-13 |
| **B. Feiner, R. Weksler, G. Ohel and S. Degani.** The influence of maternal exercise on placental blood flow measured by Simultaneous Multigate Spectral Doppler Imaging (SM-SDI). *Ultrasound in Obstetrics & Gynecology.* 2000. 15:498-501 |
| **B. G. Armstrong, A. D. Nolin and A. D. McDonald.** PMC1009753; Work in pregnancy and birth weight for gestational age. *Br.J.Ind.Med.* 1989. 46:196-199 |
| **B. G. Armstrong, A. D. Nolin and A. D. McDonald.** Work in pregnancy and birth weight for gestational age. 1989. 46:196-199 |
| **B. Hackley, H. P. Kennedy, D. C. Berry and G. D. Melkus.** A mixed-methods study on factors influencing prenatal weight gain in ethnic-minority women. 2014. 59:388-398 |
| **B. L. Rooney, C. W. Schauberger and M. A. Mathiason.** Impact of perinatal weight change on long-term obesity and obesity-related illnesses. 2005. 106:1349-1356 |
| **B. Laraia, L. Messer, K. Evenson and J. S. Kaufman.** PMC2232039; Neighborhood factors associated with physical activity and adequacy of weight gain during pregnancy. *Journal of Urban Health.* 2007. 84:793-806 |
| **B. Longo-Mbenza, K. B. Tshimanga, B. Buassa-bu-Tsumbu and M. J. Kabangu.** Diets rich in vegetables and physical activity are associated with a decreased risk of pregnancy induced hypertension among rural women from Kimpese, DR Congo. *Nigerian Journal of Medicine: Journal of the National Association of Resident Doctors of Nigeria.* 2008. 17:265-269 |
| **B. Longo-Mbenza, K. B. Tshimanga, B. Buassa-bu-Tsumbu and M. J. Kabangu.** Diets rich in vegetables and physical activity are associated with a decreased risk of pregnancy induced hypertension among rural women from Kimpese, DR Congo. 2008. 17:265-269 |
| **B. Melton, E. Marshall, H. Bland, M. Schmidt and W. K. Guion.** American rural women's exercise self-efficacy and awareness of exercise benefits and safety during pregnancy. 2013. 15:468-473 |
| **B. Neme, I. Behle and A. U. Dos Santos.** Effects of exercise test on the fetal heart in pregnancies complicated by hypertensive syndrome. Portuguese]. *Maternidade e Infancia.* 1973. 32:323-330 |
| **B. Richardson, K. Campbell, L. Carmichael and J. Patrick.** Effects of external physical stimulation on fetuses near term. *Obstet.Gynecol.* 1981. 139:344-352 |
| **B. Richardson, K. Campbell, L. Carmichael and J. Patrick.** Effects of external physical stimulation on fetuses near term. 1981. 139:344-352 |
| **B. S. Fjeldsoe, Y. D. Miller and A. L. Marshall.** MobileMums: a randomized controlled trial of an SMS-based physical activity intervention. 2010. 39:101-111 |
| **B. Sandstrom.** Adjustments of the circulation to orthostatic reaction and physical exercise during the first trimester of primipregnancy. 1974. 53:1-5 |
| **B. Sangsawang and N. Sangsawang.** Is a 6-week supervised pelvic floor muscle exercise program effective in preventing stress urinary incontinence in late pregnancy in primigravid women?: a randomized controlled trial. *European Journal of Obstetrics, Gynecology, & Reproductive Biology.* 2016. 197:103-110 |
| **B. Sangsawang and Y. Serisathien.** Effect of pelvic floor muscle exercise programme on stress urinary incontinence among pregnant women. *J.Adv.Nurs.* 2012. 68:1997-2007 |
| **B. Sangsawang and Y. Serisathien.** Effect of pelvic floor muscle exercise programme on stress urinary incontinence among pregnant women. 2012. 68:1997-2007 |
| **B. Sangsawang and Y. Serisathien.** Effect of pelvic floor muscle exercise programme on stress urinary incontinence among pregnant women. *J.Adv.Nurs.* 2012. 68:1997-2007 |
| **B. Sternfeld, C. P. Quesenberry, B. Eskenazi and L. A. Newman.** Exercise during pregnancy and pregnancy outcome. / Pratique de l ' exercice physique pendant la grossesse et son incidence sur la grossesse. *Medicine & Science in Sports & Exercise.* 1995. 27:634-640 |
| **B. W. Alderman, H. Zhao, V. L. Holt, D. H. Watts and S. A. A. Beresford.** Maternal physical activity in pregnancy and infant size for gestational age. *Ann.Epidemiol.* 1998. 8:513-519 |
| **B. W. Alderman, H. Zhao, V. L. Holt, D. H. Watts and S. A. Beresford.** Maternal physical activity in pregnancy and infant size for gestational age. *Ann.Epidemiol.* 1998. 8:513-519 |
| **Brad Schoenfeld and Gul Tiryaki-Sonmez.** Overcoming Psychosocial Barriers to Maternal Exercise: Intervention Strategies to Improve Participation and Adherence. 2011. 3:61-66 |
| **Brazil University of Campinas.** Physical Exercise Influence Among Overweight and Obese Pregnant Women. 2010. |
| **C. A. Collings, L. B. Curet and J. P. Mullin.** Maternal and fetal responses to a maternal aerobic exercise program. *American Journal of Obstetrics & Gynecology.* 1983. 145:702-707 |
| **C. A. Guzman and R. Caplan.** Cardiorespiratory response to exercise during pregnancy. *Obstet.Gynecol.* 1970. 108:600-605 |
| **C. A. Guzman and R. Caplan.** Cardiorespiratory response to exercise during pregnancy. 1970. 108:600-605 |
| **C. A. Guzman, R. Caplan and M. R. Becklake.** Cardiorespiratory response to exercise during pregnancy. 1969. 28:786-& |
| **C. A. Hickey, S. P. Cliver, F. X. Mulvihill, S. F. McNeal, H. J. Hoffman and R. L. Goldenberg.** Employment-related stress and preterm delivery: a contextual examination. 1995. 110:410-418 |
| **C. A. Nielsen, I. Sigsgaard, M. Olsen, M. Tolstrup, B. Danneskiold-Samsoee and J. E. Bock.** Trainability of the pelvic floor. A prospective study during pregnancy and after delivery. 1988. 67:437-440 |
| **C. A. Snapp and S. K. Donaldson.** Gestational diabetes mellitus: physical exercise and health outcomes. 2008. 10:145-155 |
| **C. A. Snijder, T. Brand, V. Jaddoe, et al.** Physically demanding work, fetal growth and the risk of adverse birth outcomes. The Generation R Study. *Occupational & Environmental Medicine.* 2012. 69:543-550 |
| **C. A. Snijder, T. Brand, V. Jaddoe, et al.** Physically demanding work, fetal growth and the risk of adverse birth outcomes. The Generation R Study. 2012. 69:543-550 |
| **C. A. Vamos, S. Flory, H. Sun, et al.** Do Physical Activity Patterns Across the Lifecourse Impact Birth Outcomes?. 2015. 19:1775-1782 |
| **C. A. Vinter, D. M. Jensen, P. Ovesen, H. Beck-Nielsen and J. S. Jorgensen.** The LiP (Lifestyle in Pregnancy) study: A randomized controlled trial of lifestyle intervention in 360 obese pregnant women. *Diabetes Care.* 2011. 34:2502-2507 |
| **C. Abeysena and P. Jayawardana.** Sleep deprivation, physical activity and low income are risk factors for inadequate weight gain during pregnancy: a cohort study. 2011. 37:734-740 |
| **C. Abeysena and P. Jayawardana.** Sleep deprivation, physical activity and low income are risk factors for inadequate weight gain during pregnancy: A cohort study. *J.Obstet.Gynaecol.Res.* 2011. 37:734-740 |
| **C. Abeysena, P. Jayawardana and A. Seneviratne Rde.** Effect of psychosocial stress and physical activity on preterm birth: a cohort study. *Journal of Obstetrics & Gynaecology Research.* 2010. 36:260-267 |
| **C. Abeysena, P. Jayawardana and A. Seneviratne Rde.** Effect of psychosocial stress and physical activity on low birthweight: a cohort study. *Journal of Obstetrics & Gynaecology Research.* 2010. 36:296-303 |
| **C. Abeysena, P. Jayawardana and R. D. A. Seneviratne.** Effect of psychosocial stress and physical activity on low birthweight: A cohort study. *J.Obstet.Gynaecol.Res.* 2010. 36:296-303 |
| **C. Albright, J. E. Maddock and C. R. Nigg.** Physical activity before pregnancy and following childbirth in a multiethnic sample of healthy women in Hawaii. 2005. 42:95-110 |
| **C. Amezcua-Prieto, P. Lardelli-Claret, R. Olmedo-Requena, J. Mozas-Moreno, A. Bueno-Cavanillas and J. J. Jimenez-Moleon.** Compliance with leisure-time physical activity recommendations in pregnant women. 2011. 90:245-252 |
| **C. B. Eaton, J. Maccani, G. Agha, et al.** Adverse early life exposures and carotid atherosclerosis in midlife: Leap study. *Circulation.* 2014. 129: |
| **C. B. Olsson, L. Nilsson-Wikmar and W. J. Grooten.** Determinants for lumbopelvic pain 6 months postpartum. 2012. 34:416-422 |
| **C. B. Rudra, T. K. Sorensen, D. A. Luthy and M. A. Williams.** A prospective analysis of recreational physical activity and preeclampsia risk. *Med.Sci.Sports Exerc.* 2008. 40:1581-1588 |
| **C. B. Rudra, T. K. Sorensen, D. A. Luthy and M. A. Williams.** A prospective analysis of recreational physical activity and preeclampsia risk. 2008. 40:1581-1588 |
| **C. Bish, S. Chu, C. Shapiro-Mendoza, A. Sharma and H. M. Blanck.** Trying to lose or maintain weight during pregnancy -- United States, 2003. 2009. 13:286-292 7 |
| **C. Botkin and C. E. Driscoll.** Maternal aerobic exercise: newborn effects. *Fam.Pract.Res.J.* 1991. 11:387-393 |
| **C. C. D. Perkins, J. M. Pivarnik, N. Paneth and A. D. Stein.** Physical activity and fetal growth during pregnancy. *Obstet.Gynecol.* 2007. 109:81-87 |
| **C. C. M. Röst, J. Jacqueline, A. Kaiser, A. P. Verhagen and B. W. Koes.** Pelvic pain during pregnancy: a descriptive study of signs and symptoms of 870 patients in primary care. 2004. 29:2567-2572 6 |
| **C. C. Perkins, J. M. Pivarnik, N. Paneth and A. D. Stein.** Physical activity and fetal growth during pregnancy.Erratum appears in Obstet Gynecol. 2007 Apr;109(4):1002 Note: Stein, Aryeth D corrected to Stein, Aryeh D]]. *Obstetrics & Gynecology.* 2007. 109:81-87 |
| **C. Coll, M. Domingues, I. Santos, A. Matijasevich, B. L. Horta and P. C. Hallal.** Changes in Leisure-Time Physical Activity From the Prepregnancy to the Postpartum Period: 2004 Pelotas (Brazil) Birth Cohort Study. *Journal of Physical Activity & Health.* 2016. 13:361-365 |
| **C. Collings and L. B. Curet.** Fetal heart rate response to maternal exercise. *American Journal of Obstetrics & Gynecology.* 1985. 151:498-501 |
| **C. de Oliveira, M. A. Lopes, Carla Longo e Pereira, L. and M. Zugaib.** Effects of pelvic floor muscle training during pregnancy. 2007. 62:439-446 |
| **C. Dominguez de Costa, A. Lerdo de Tejada, P. Eisenberg de Smoler, et al.** [Decrease of Ac. 5-HIA excretion in urine induced by exercise in pregnant women]. 1978. 44:347-353 |
| **C. E. Mbada, O. E. Adebayo, A. B. Adeyemi, et al.** Knowledge and Attitude of Nigerian Pregnant Women towards Antenatal Exercise: A Cross-Sectional Survey. 2014. 2014:260539 |
| **C. E. Mbada, O. E. Adebayo, T. O. Awotidebe, et al.** Practice and pattern of antenatal and postnatal exercise among Nigerian women: A cross-sectional study. 2015. 3:93-98 |
| **C. Elliott, S. Houghton and S. Langsford.** The use of visual prompts to increase kegel exercise performance in pregnant women: A case study. 1997. 14:231-235 |
| **C. F. Lee, F. M. Hwang, H. M. Lin, L. K. Chi and L. Y. Chien.** The Physical Activity Patterns of Pregnant Taiwanese Women. *Journal of Nursing Research.* 2016. 24:291-299 |
| **C. F. Lee, I. C. Chiang, F. M. Hwang, L. K. Chi and H. M. Lin.** Using the Theory of Planned Behavior to predict pregnant women's intention to engage in regular exercise. *Midwifery.* 2016. 42:80-86 |
| **C. F. Yan, Y. C. Hung, M. L. Gau and K. C. Lin.** Effects of a stability ball exercise programme on low back pain and daily life interference during pregnancy. *Midwifery.* 2014. 30:412-419 |
| **C. Ferreira, H. Dutra, L. Dias, et al.** Heart rate and blood pressure in response to pelvic floor muscle training during pregnancy. *Int.Urogynecol.J.Pelvic Floor Dysfunct.* 2011. 22:S1471-S1472 |
| **C. Fleten, H. Stigum, P. Magnus and W. Nystad.** Exercise during pregnancy, maternal prepregnancy body mass index, and birth weight. *Obstetrics & Gynecology.* 2010. 115:331-337 |
| **C. G. Dominguez, P. E. De Smoler, J. Armas Dominguez, S. Karchmer and D. Skromne.** Electrocardiography, stress and the third pregnancy trimester]. *Arch.Inst.Cardiol.Mex.* 1976. 46:74-81 |
| **C. H. Chuang, M. R. Stengel, S. W. Hwang, D. Velott, K. H. Kjerulff and J. L. Kraschnewski.** Behaviours of overweight and obese women during pregnancy who achieve and exceed recommended gestational weight gain. 2014. 8:e577-83 |
| **C. H. Ferreira, L. M. Naldoni, S. Ribeiro Jdos, M. C. Meirelles, C. Cavalli Rde and K. Bo.** Maternal blood pressure and heart rate response to pelvic floor muscle training during pregnancy. 2014. 93:678-683 |
| **C. H. Ferreira, L. M. V. Naldoni, J. D. S. Ribeiro, M. C. C. C. Meirelles, R. D. C. Cavalli and K. Bo.** Maternal blood pressure and heart rate response to pelvic floor muscle training during pregnancy. *Acta Obstet.Gynecol.Scand.* 2014. 93:678-683 |
| **C. J. Homer, S. A. Beresford, S. A. James, E. Siegel and S. Wilcox.** Work-related physical exertion and risk of preterm, low birthweight delivery. *Paediatr.Perinat.Epidemiol.* 1990. 4:161-174 |
| **C. J. Homer, S. A. Beresford, S. A. James, E. Siegel and S. Wilcox.** Work-related physical exertion and risk of preterm, low birthweight delivery. 1990. 4:161-174 |
| **C. J. Spaaij, J. M. van Raaij, L. C. de Groot, van der Heijden, L. J., H. A. Boekholt and J. G. Hautvast.** No changes during pregnancy in the net cost of cycling exercise. 1994. 48:513-521 |
| **C. J. Vladutiu, K. R. Evenson and S. W. Marshall.** Physical Activity and Injuries During Pregnancy. *Journal of Physical Activity & Health.* 2010. 7:761-769 |
| **C. J. Vladutiu, K. R. Evenson and S. W. Marshall.** Physical activity and injuries during pregnancy. 2010. 7:761-769 |
| **C. Kim, L. N. McEwen, E. C. Kieffer, W. H. Herman and J. D. Piette.** NIHMS614289 PMC4139034; Self-efficacy, social support, and associations with physical activity and body mass index among women with histories of gestational diabetes mellitus. *Diabetes Educ.* 2008. 34:719-728 |
| **C. Kim, M. Draska, M. L. Hess, E. J. Wilson and C. R. Richardson.** NIHMS614297 PMC4139030; A web-based pedometer programme in women with a recent history of gestational diabetes. *Diabetic Med.* 2012. 29:278-283 |
| **C. L. Battle, L. A. Uebelacker, S. R. Magee, K. A. Sutton and I. W. Miller.** NIHMS658326 Available on 03/01/16] PMC4393850 Available on 03/01/16]; Potential for prenatal yoga to serve as an intervention to treat depression during pregnancy. *Womens Health Issues.* 2015. 25:134-141 |
| **C. L. Battle, L. A. Uebelacker, S. R. Magee, K. A. Sutton and I. W. Miller.** Potential for prenatal yoga to serve as an intervention to treat depression during pregnancy. 2015. 25:134-141 |
| **C. L. Butler, M. A. Williams, T. K. Sorensen, I. O. Frederick and W. M. Leisenring.** Relation between maternal recreational physical activity and plasma lipids in early pregnancy. *Am.J.Epidemiol.* 2004. 160:350-359 |
| **C. L. Butler, M. A. Williams, T. K. Sorensen, I. O. Frederick and W. M. Leisenring.** Relation between maternal recreational physical activity and plasma lipids in early pregnancy. 2004. 160:350-359 |
| **C. L. Harrison, C. B. Lombard and H. J. Teede.** Limiting postpartum weight retention through early antenatal intervention: the HeLP-her randomised controlled trial. 2014. 11:134 |
| **C. L. Harrison, C. B. Lombard and H. J. Teede.** PMC4221718; Limiting postpartum weight retention through early antenatal intervention: the HeLP-her randomised controlled trial. *International Journal of Behavioral Nutrition & Physical Activity.* 2014. 11:134 |
| **C. L. Harrison, C. B. Lombard and H. J. Teede.** Understanding early pregnancy health behaviours among overweight and obese women at risk of gestational diabetes mellitus. *Obesity Research and Clinical Practice.* 2011. 5:S27 |
| **C. L. Harrison, C. B. Lombard and H. J. Teede.** Understanding health behaviours in a cohort of pregnant women at risk of gestational diabetes mellitus: an observational study. *BJOG: An International Journal of Obstetrics & Gynaecology.* 2012. 119:731-738 |
| **C. L. Harrison, C. B. Lombard, B. J. Strauss and H. J. Teede.** Optimizing healthy gestational weight gain in women at high risk of gestational diabetes: a randomized controlled trial. *Obesity.* 2013. 21:904-909 |
| **C. L. Harrison, C. B. Lombard, B. J. Strauss and H. J. Teede.** Optimizing healthy gestational weight gain in women at high risk of gestational diabetes: a randomized controlled trial. 2013. 21:904-909 |
| **C. L. Harrison, C. B. Lombard, B. J. Strauss and H. J. Teede.** Optimizing healthy gestational weight gain in women at high risk of gestational diabetes: a randomized controlled trial.Erratum appears in Obesity (Silver Spring). 2016 Jan;24(1):268; PMID: 26692583]. *Obesity.* 2013. 21:904-909 |
| **C. L. Harrison, R. G. Thompson, H. J. Teede and C. B. Lombard.** Measuring physical activity during pregnancy. *International Journal of Behavioral Nutrition and Physical Activity.* 2011. 8: |
| **C. L. Martin and L. R. Brunner Huber.** Physical activity and hypertensive complications during pregnancy: findings from 2004 to 2006 North Carolina Pregnancy Risk Assessment Monitoring System. 2010. 37:202-210 |
| **C. L. Nesler, S. L. Hassett, S. Cary and J. Brooke.** Effects of supine exercise on fetal heart rate in the second and third trimesters. *Am.J.Perinatol.* 1988. 5:159-163 |
| **C. M. Chiarello, L. A. Falzone, K. E. McCaslin, M. N. Patel and K. R. Ulery.** The effects of an exercise program on diastasis recti abdominis in pregnant women [corrected] [published erratum appears in *J womens health phys ther* 2005;29(3):76]. 2005. 29:11-16 6 |
| **C. M. Cottrill, J. M. Kotchen, G. Guthrie and T. Kotchen.** Cardiovascular responses to exercise following adolescent hypertensive pregnancy. *Journal of Adolescent Health Care.* 1980. 1:91-95 |
| **C. M. Devine, C. F. Bove and C. M. Olson.** Continuity and change in women's weight orientations and lifestyle practices through pregnancy and the postpartum period: the influence of life course trajectories and transitional events. 2000. 50:567-582 |
| **C. M. Olson and M. S. Strawderman.** Modifiable behavioral factors in a biopsychosocial model predict inadequate and excessive gestational weight gain. 2003. 103:48-54 |
| **C. M. Olson, M. S. Strawderman, P. S. Hinton and T. A. Pearson.** Gestational weight gain and postpartum behaviors associated with weight change from early pregnancy to 1 y postpartum. *International Journal of Obesity & Related Metabolic Disorders: Journal of the International Association for the Study of Obesity.* 2003. 27:117-127 |
| **C. M. Sampselle, J. M. Miller, B. L. Mims, J. O. Delancey, J. A. Ashton-Miller and C. L. Antonakos.** Effect of pelvic muscle exercise on transient incontinence during pregnancy and after birth. 1998. 91:406-412 |
| **C. Mattocks, A. Ness, K. Deere, et al.** Early life determinants of physical activity in 11 to 12 year olds: cohort study. 2008. 336:26-29 |
| **C. McParlin, S. C. Robson, P. W. G. Tennant, et al.** Objectively measured physical activity during pregnancy: A study in obese and overweight women. *BMC Pregnancy and Childbirth.* 2010. 10: |
| **C. McParlin, S. C. Robson, P. W. Tennant, et al.** Objectively measured physical activity during pregnancy: a study in obese and overweight women. 2010. 10:76 |
| **C. N. Spracklen, K. K. Ryckman, E. W. Triche and A. F. Saftlas.** Physical Activity During Pregnancy and Subsequent Risk of Preeclampsia and Gestational Hypertension: A Case Control Study. *Maternal & Child Health Journal.* 2016. 20:1193-1202 |
| **C. Nav**. Analizando la relación entre el aumento del peso fetal y la realización de ejercicio físico. / exploring the relationship between the fetusweight gain and the practice of physical activity. *Journal of Sport & Health Research.* 2013. 5:319-322 |
| **C. Nobles, B. H. Marcus, E. J. Stanek 3, et al.** NIHMS656730 Available on 05/01/16] PMC4418021 Available on 05/01/16]; Effect of an exercise intervention on gestational diabetes mellitus: a randomized controlled trial. *Obstetrics & Gynecology.* 2015. 125:1195-1204 |
| **C. P. Ribeiro and H. Milanez.** Knowledge, attitude and practice of women in Campinas, Sao Paulo, Brazil with respect to physical exercise in pregnancy: a descriptive study. 2011. 8:31 |
| **C. P. Ribeiro and H. Milanez.** PMC3220627; Knowledge, attitude and practice of women in Campinas, Sao Paulo, Brazil with respect to physical exercise in pregnancy: a descriptive study. *Reproductive Health.* 2011. 8:31 |
| **C. Pavlou, T. Chard, J. Landon and A. T. Letchworth.** Circulating levels of human placental lactogen in late pregnancy: the effect of glucose loading, smoking and exercise. 1973. 3:45-49 |
| **C. R. Beckmann and C. A. Beckmann.** Effect of a structured antepartum exercise program on pregnancy and labor outcome in primiparas. *J.Reprod.Med.* 1990. 35:704-709 |
| **C. R. Holroyd, N. C. Harvey, S. R. Crozier, et al.** EMS53569 PMC3800076; Placental size at 19 weeks predicts offspring bone mass at birth: findings from the Southampton Women's Survey. *Placenta.* 2012. 33:623-629 |
| **C. Ruissen, W. Jager, M. von Drongelen and H. Hoogland.** The influence of maternal exercise on the pulsatility index of the umbilical artery blood velocity waveform. *European Journal of Obstetrics, Gynecology, & Reproductive Biology.* 1990. 37:1-6 |
| **C. S. Deshpande, A. Rakhshani, R. Nagarathna, et al.** Yoga for high-risk pregnancy: a randomized controlled trial.[Erratum appears in Ann Med Health Sci Res. 2014 Nov;4(6):978 Note: Rakshani, A [corrected to Rakhshani, A]]. 2013. 3:341-344 |
| **C. S. Harrod, L. Chasan-Taber, R. M. Reynolds, et al.** NIHMS600800 Available on 08/01/15] PMC4111108 Available on 08/01/15]; Physical activity in pregnancy and neonatal body composition: the Healthy Start study. *Obstetrics & Gynecology.* 2014. 124:257-264 |
| **C. S. Harrod, L. Chasan-Taber, R. M. Reynolds, et al.** Physical Activity during Pregnancy and Neonatal Fat Mass: The Healthy Start Study. *Diabetes.* 2014. 63:A42 |
| **C. S. Rabkin, H. R. Anderson, J. M. Bland, O. G. Brooke, G. Chamberlain and J. L. Peacock.** Maternal activity and birth weight: a prospective, population-based study. *Am.J.Epidemiol.* 1990. 131:522-531 |
| **C. S. Rabkin, H. R. Anderson, J. M. Bland, O. G. Brooke, G. Chamberlain and J. L. Peacock.** Maternal activity and birth weight: a prospective, population-based study. 1990. 131:522-531 |
| **C. Savi, G. Milic-Emili and E. De Minicis.** [The physiology of muscullar exercise in women at the termination of pregnancy]. 1959. 58:403-412 |
| **C. Schou Andersen, M. Juhl, M. Gamborg, T. I. Sorensen and E. A. Nohr.** PMC3324144; Maternal Recreational Exercise during Pregnancy in relation to Children's BMI at 7 Years of Age. *International Journal of Pediatrics.* 2012. 2012:920583 |
| **C. Schou Andersen, M. Juhl, M. Gamborg, T. I. Sorensen and E. A. Nohr.** Maternal Recreational Exercise during Pregnancy in relation to Children's BMI at 7 Years of Age. 2012. 2012:920583 |
| **C. Silveira, B. G. Pereira, J. G. Cecatti, S. R. Cavalcante and R. I. Pereira.** PMC2936287; Fetal cardiotocography before and after water aerobics during pregnancy. *Reproductive Health.* 2010. 7:23 |
| **C. Taniguchi and C. Sato.** Home-based walking during pregnancy affects mood and birth outcomes among sedentary women: A randomized controlled trial. *Int.J.Nurs.Pract.* 2016. 7:7 |
| **C. Taniguchi and C. Sato.** Home-based walking during pregnancy affects mood and birth outcomes among sedentary women: A randomized controlled trial. *Int.J.Nurs.Pract.* 2016. 7:7 |
| **C. Taves, J. Charteris and J. C. Wall.** The kinematics of treadmill walking during pregnancy. *Physiotherapy Canada.* 1982. 34:321-324 |
| **C. Tragea, G. P. Chrousos, E. C. Alexopoulos and C. Darviri.** A randomized controlled trial of the effects of a stress management programme during pregnancy. 2014. 22:203-211 |
| **C. W. Burnett.** The value of antenatal exercises. 1956. 63:40-57 |
| **C. W. Ko, P. G. Napolitano, S. P. Lee, S. D. Schulte, M. A. Ciol and S. A. Beresford.** Physical activity, maternal metabolic measures, and the incidence of gallbladder sludge or stones during pregnancy: a randomized trial. *Am.J.Perinatol.* 2014. 31:39-48 |
| **C. W. Ko, P. G. Napolitano, S. P. Lee, S. D. Schulte, M. A. Ciol and S. A. Beresford.** Physical activity, maternal metabolic measures, and the incidence of gallbladder sludge or stones during pregnancy: a randomized trial. 2014. 31:39-48 |
| **C. W. Waage, I. Mdala, A. K. Jenum, T. M. Michelsen, K. I. Birkeland and L. Sletner.** Ethnic differences in blood pressure from early pregnancy to postpartum: a Norwegian cohort study. *J.Hypertens.* 2016. 34:1151-1159 |
| **C. Wang, W. Zhu, Y. Wei, H. Feng, R. Su and H. Yang.** PMC4603976; Exercise intervention during pregnancy can be used to manage weight gain and improve pregnancy outcomes in women with gestational diabetes mellitus. *BMC Pregnancy & Childbirth.* 2015. 15:255 |
| **C. Ward-Ritacco, M. S. Poudevigne and P. J. O'Connor.** Muscle strengthening exercises during pregnancy are associated with increased energy and reduced fatigue. *Journal of Psychosomatic Obstetrics & Gynecology.* 2016. 37:68-72 |
| **C. Wharton and M. J. Benton.** DataBase: research and evaluation results. Resistance exercise decreases the need for insulin in overweight women with gestational diabetes mellitus. *American Journal of Health Promotion.* 2006. 20:441-442 2p |
| **C. Woldringh, M. van den Wijngaart, P. Albers-Heitner, Lycklama a Nijeholt, A. A. and T. Lagro-Janssen.** Pelvic floor muscle training is not effective in women with UI in pregnancy: a randomised controlled trial. 2007. 18:383-390 |
| **C. Wuertz, P. Gilbert, W. Baier and C. Kunz.** Cross-sectional study of factors that influence the 25-hydroxyvitamin D status in pregnant women and in cord blood in Germany. *Br.J.Nutr.* 2013. 110:1895-1902 |
| **C. Y. Yates, L. M. Boylan, R. D. Lewis and J. A. Driskell.** Maternal aerobic exercise and vitamin B-6 status. 1988. 48:117-121 |
| **C. Zhang, C. G. Solomon, J. E. Manson and F. B. Hu.** A prospective study of pregravid physical activity and sedentary behaviors in relation to the risk for gestational diabetes mellitus. *Arch.Intern.Med.* 2006. 166:543-548 |
| **C. Zhang, C. G. Solomon, J. E. Manson and F. B. Hu.** A prospective study of pregravid physical activity and sedentary behaviors in relation to the risk for gestational diabetes mellitus. 2006. 166:543-548 |
| **Catherine Kim, Phyllis Brawarsky, Rebecca A. Jackson, Elena Fuentes-Afflick and Jennifer S. Haas.** Changes in health status experienced by women with gestational diabetes and pregnancy-induced hypertensive disorders. 2005. 14:729-736 |
| **Ch Estel and W. Turk.** The influence of a defined physical exercise during pregnancy on the functional values of the maternal cardiovascular system and on fetal heart rate. *Zentralbl.Gynakol.* 1987. 109:929-935 |
| **Cheryl Vamos, Sara Flory, Haichun Sun, et al.** Do Physical Activity Patterns Across the Lifecourse Impact Birth Outcomes?. *Maternal & Child Health Journal.* 2015. 19:1775-1782 8p |
| **Christopher P. Connolly.** Leisure-time physical activity perceptions, influences, and behavior during pregnancy. 2015. 75:No Pagination Specified |
| **Colleen Doyle, Elizabeth Werner, Tianshu Feng, et al.** Pregnancy distress gets under fetal skin: Maternal ambulatory assessment & sex differences in prenatal development. *Dev.Psychobiol.* 2015. 57:607-625 |
| **Corinne Urech, Nadine S. Fink, Irene Hoesli, Frank H. Wilhelm, Johannes Bitzer and Judith Alder.** Effects of relaxation on psychobiological wellbeing during pregnancy: A randomized controlled trial. 2010. 35:1348-1355 |
| **Cuilin Zhang, Deirdre K. Tobias, Jorge E. Chavarro, et al.** Adherence to healthy lifestyle and risk of gestational diabetes mellitus: Prospective cohort study. *BMJ: British Medical Journal Vol 349 Sep 2014, ArtID g5450.* 2014. 349: |
| **Curt L. Lox and Darren C. Treasure.** Changes in feeling states following aquatic exercise during pregnancy. 2000. 30:518-517 |
| **D. C. Hall and D. A. Kaufmann.** Effects of aerobic and strength conditioning on pregnancy outcomes. *American Journal of Obstetrics & Gynecology.* 1987. 157:1199-1203 |
| **D. C. Pinzon, K. Zamora, J. H. Martinez, et al.** Type of delivery and gestational age is not affected by pregnant Latin-American women engaging in vigorous exercise: a secondary analysis of data from a controlled randomized trial. *Revista de Salud Publica.* 2012. 14:731-743 |
| **D. Cannella, M. Lobel and A. Monheit.** Knowing is believing: information and attitudes towards physical activity during pregnancy. 2010. 31:236-242 |
| **D. Da Costa, N. Rippen, M. Dritsa and A. Ring.** Self-reported leisure-time physical activity during pregnancy and relationship to psychological well-being. *Journal of Psychosomatic Obstetrics and Gynecology.* 2003. 24:111-119 |
| **D. Da Costa, N. Rippen, M. Dritsa and A. Ring.** Self-reported leisure-time physical activity during pregnancy and relationship to psychological well-being. 2003. 24:111-119 |
| **D. Duncombe, H. Skouteris, E. H. Wertheim, L. Kelly, V. Fraser and S. J. Paxton.** Vigorous exercise and birth outcomes in a sample of recreational exercisers: a prospective study across pregnancy. *Aust.N.Z.J.Obstet.Gynaecol.* 2006. 46:288-292 |
| **D. E. Irwin, D. A. Savitz, K. A. St Andre and I. Hertz-Picciotto.** Study of occupational risk factors for pregnancy-induced hypertension among active duty enlisted Navy personnel. 1994. 25:349-359 |
| **D. H. Moore, J. C. Jarrett 2 and P. J. Bendick.** Exercise-induced changes in uterine artery blood flow, as measured by Doppler ultrasound, in pregnant subjects. *Am.J.Perinatol.* 1988. 5:94-97 |
| **D. Hruba, L. Kukla and M. Tyrlik.** Occupational risks for human reproduction: ELSPAC Study. European Longitudinal Study of Pregnancy and Childhood. *Cent.Eur.J.Public Health.* 1999. 7:210-215 |
| **D. Hruba, L. Kukla and M. Tyrlik.** Occupational risks for human reproduction: ELSPAC Study. European Longitudinal Study of Pregnancy and Childhood. 1999. 7:210-215 |
| **D. J. Taylor, C. H. Thompson, G. J. Kemp, et al.** A relationship between impaired fetal growth and reduced muscle glycolysis revealed by 31P magnetic resonance spectroscopy. *Diabetologia.* 1995. 38:1205-1212 |
| **D. J. Tuffnell, P. C. Buchan, D. Albert and S. Tyndale-Biscoe.** Fetal heart rate responses to maternal exercise, increased maternal temperature and maternal circadian variation. *Journal of Obstetrics and Gynaecology.* 1990. 10:387-391 |
| **D. Jensen and D. E. O'Donnell.** The impact of human pregnancy on perceptual responses to chemoreflex vs. exercise stimulation of ventilation: a retrospective analysis. 2011. 175:55-61 |
| **D. Jensen, K. A. Webb and D. E. O'Donnell.** The increased ventilatory response to exercise in pregnancy reflects alterations in the respiratory control systems ventilatory recruitment threshold for CO2. 2010. 171:75-82 |
| **D. Jensen, K. A. Webb, G. A. Davies and D. E. O'Donnell.** Mechanical ventilatory constraints during incremental cycle exercise in human pregnancy: implications for respiratory sensation. 2008. 586:4735-4750 |
| **D. Jensen, K. A. Webb, G. A. Davies and D. E. O'Donnell.** Mechanisms of activity-related breathlessness in healthy human pregnancy. 2009. 106:253-265 |
| **D. Jensen, K. A. Webb, L. A. Wolfe and D. E. O'Donnell.** Effects of human pregnancy and advancing gestation on respiratory discomfort during exercise. *Respiratory Physiology and Neurobiology.* 2007. 156:85-93 |
| **D. Jensen, K. A. Webb, L. A. Wolfe and D. E. O'Donnell.** Effects of human pregnancy and advancing gestation on respiratory discomfort during exercise. 2007. 156:85-93 |
| **D. Koniakgriffin.** Aerobic exercise, psychological well-being, and physical discomforts during adolescent pregnancy. *Res.Nurs.Health.* 1994. 17:253-263 |
| **D. L. Barnes, L. S. Adair and B. M. Popkin.** Source: PIP. 066229 Source: POP. 00203051; Women's physical activity and pregnancy outcome: a longitudinal analysis from the Philippines. *Int.J.Epidemiol.* 1991. 20:162-172 |
| **D. L. Barnes, L. S. Adair and B. M. Popkin.** Women's physical activity and pregnancy outcome: a longitudinal analysis from the Philippines. 1991. 20:162-172 |
| **D. L. Barnes, L. S. Adair and B. M. Popkin.** Women's physical activity and pregnancy outcome: A longitudinal analysis from the Philippines. *Int.J.Epidemiol.* 1991. 20:162-172 |
| **D. Mparmpakas, A. Goumenou, E. Zachariades, G. Pados, Y. Gidron and E. Karteris.** Immune system function, stress, exercise and nutrition profile can affect pregnancy outcome: Lessons from a Mediterranean cohort. 2013. 5:411-418 |
| **D. P. Misra, D. M. Strobino, E. E. Stashinko, D. A. Nagey and J. Nanda.** Effects of physical activity on preterm birth. *Am.J.Epidemiol.* 1998. 147:628-635 |
| **D. R. Di Fabio, C. K. Blomme, K. M. Smith, G. J. Welk and C. G. Campbell.** Adherence to physical activity guidelines in mid-pregnancy does not reduce sedentary time: an observational study. 2015. 12:27 |
| **D. R. Hollingsworth and T. R. Moore.** Postprandial walking exercise in pregnant insulin-dependent (type I) diabetic women: reduction of plasma lipid levels but absence of a significant effect on glycemic control. *American Journal of Obstetrics & Gynecology.* 1987. 157:1359-1363 |
| **D. R. Hollingsworth and T. R. Moore.** Postprandial walking exercise in pregnant insulin-dependent (type I) diabetic women: reduction of plasma lipid levels but absence of a significant effect on glycemic control. 1987. 157:1359-1363 |
| **D. S. Downs and H. A. Hausenblas.** Pregnant women's third trimester exercise behaviors, body mass index, and pregnancy outcomes. *Psychol.Health.* 2007. 22:545-559 15p |
| **D. S. Downs, G. C. LeMasurier and J. M. DiNallo.** Baby Steps: Pedometer-Determined and Self-Reported Leisure-Time Exercise Behaviors of Pregnant Women. *Journal of Physical Activity & Health.* 2009. 6:63-72 |
| **D. S. Downs, G. C. LeMasurier and J. M. DiNallo.** Baby steps: pedometer-determined and self-reported leisure-time exercise behaviors of pregnant women. 2009. 6:63-72 |
| **D. Simmons, J. G. Jelsma, S. Galjaard, et al.** Results From a European Multicenter Randomized Trial of Physical Activity and/or Healthy Eating to Reduce the Risk of Gestational Diabetes Mellitus: The DALI Lifestyle Pilot. 2015. 38:1650-1656 |
| **D. Simmons, J. Jelmsa, S. Galjaard, et al.** Results from a european multicentre, randomised trial of physical activity and/or healthy eating to reduce the risk of gestational diabetes mellitus (GDM): The dali pilot study. *Diabetes.* 2015. 64:A38 |
| **D. Symons Downs and J. S. Ulbrecht.** Understanding exercise beliefs and behaviors in women with gestational diabetes mellitus. 2006. 29:236-240 |
| **Danielle A. J. M. Schoenaker, Sabita S. Soedamah-Muthu, Leonie K. Callaway and Gita D. Mishra.** Prepregnancy dietary patterns and risk of developing hypertensive disorders of pregnancy: results from the Australian Longitudinal Study on Women's Health. 2015. 102:94-101 8 |
| **de Smoler Eisenberg, J. Armass-Dominguez, C. Dominguez-Munguia and S. Karchmer.** Maternal exercise and maternal and fetal heart rate]. *Arch.Invest.Med.* 1974. 5:595-602 |
| **de Viñaspre Hernández, Regina Ruiz, Encarnación Rubio Aranda and Concepción Tomás Aznar.** Urinary incontinence and weight changes during pregnancy and post partum: A pending challenge. 2013. 29:e123-9 1 |
| **Debbie M. Smith, Christine Ward, Shareen Forbes, Rebecca M. Reynolds and Fiona C. Denison.** Weight Management Guides for Pregnant Women with a Body Mass index (BMI) Greater than or Equal to 40kg/m[Superscript 2]: A Qualitative Exploration of Their Use in Maternity Care. 2013. 72:216-221 |
| **Deirdre Dlugonski and Robert W. Motl.** Marital status and motherhood: Implications for physical activity. *Women Health.* 2013. 53:203-215 |
| **Denise Maher.** Exercise and Weight Management for the Pregnant Amputee. 2006. 15:24-24 |
| **der Ploeg van, M. N. van Poppel, T. Chey, et al.** The role of pre-pregnancy physical activity and sedentary behaviour in the development of gestational diabetes mellitus. *Journal of Science & Medicine in Sport.* 2011. 14:149-152 4p |
| **der Wijden van, de Waal Delemarre-van, W. van Mechelen and M. N. van Poppel.** The relationship between moderate-to-vigorous intensity physical activity and insulin resistance, insulin-like growth factor (IGF-1)-system 1, leptin and weight change in healthy women during pregnancy and after delivery. *Clin.Endocrinol.(Oxf).* 2015. 82:68-75 |
| **Der Wijden Van, Van De Waal, W. Van Mechelen and Van Poppel M.N.M.** The relationship between moderate-to-vigorous intensity physical activity and insulin resistance, insulin-like growth factor (IGF-1)-system 1, leptin and weight change in healthy women during pregnancy and after delivery. *Clin.Endocrinol.(Oxf).* 2015. 82:68-75 |
| **Dominguez De Costa, Eisenberg De Smoler, J. Armas Dominguez and S. Karchmer.** Exercise tests, heart rate and changes in the mother's position. 1977. 42:11-19 |
| **E. A. Morris, C. A. McBride, G. J. Badger and I. M. Bernstein.** Prepregnancy blood pressure and history of first trimester loss contribute to birth weight and placental weight. *Reproductive Sciences.* 2015. 22:185A-186A |
| **E. A. Steegers, G. Buunk, R. A. Binkhorst, H. W. Jongsma, P. F. Wijn and P. R. Hein.** The influence of maternal exercise on the uteroplacental vascular bed resistance and the fetal heart rate during normal pregnancy. *European Journal of Obstetrics, Gynecology, & Reproductive Biology.* 1988. 27:21-26 |
| **E. Althuizen, van der Wijden, C. L., W. van Mechelen, J. C. Seidell and M. N. van Poppel.** The effect of a counselling intervention on weight changes during and after pregnancy: a randomised trial. 2013. 120:92-99 |
| **E. Althuizen, van Poppel, M. N. M., J. C. Seidell and W. van Mechelen.** Correlates of absolute and excessive weight gain during pregnancy. 2009. 18:1559-1566 8 |
| **E. Dale, K. M. Mullinax and D. H. Bryan.** Exercise during pregnancy: effects on the fetus. *Canadian Journal of Applied Sport Sciences - Journal Canadien des Sciences Appliquees au Sport.* 1982. 7:98-103 |
| **E. E. Krans and J. C. Chang.** Low-income African American women's beliefs regarding exercise during pregnancy. 2012. 16:1180-1187 |
| **E. F. Magann, S. F. Evans and J. P. Newnham.** Employment, exertion, and pregnancy outcome: assessment by kilocalories expended each day. *American Journal of Obstetrics & Gynecology.* 1996. 175:182-187 |
| **E. F. Magann, S. F. Evans and J. P. Newnham.** Employment, exertion, and pregnancy outcome: assessment by kilocalories expended each day. 1996. 175:182-187 |
| **E. F. Magann, S. F. Evans, B. Weitz and J. Newnham.** Antepartum, intrapartum, and neonatal significance of exercise on healthy low-risk pregnant working women. *Obstetrics & Gynecology.* 2002. 99:466-472 |
| **E. Forsum, N. Kabir, A. Sadurskis and K. Westerterp.** Total energy expenditure of healthy Swedish women during pregnancy and lactation. 1992. 56:334-342 |
| **E. Golomer, D. Ducher, G. S. Arfi and R. Sud.** A study of pregnant women while walking and while carrying a weight. French]. *J.Gynecol.Obstet.Biol.Reprod.* 1991. 20:406-412 |
| **E. Golomer, J. S. Arfi, R. Sud, B. Kapitaniak and J. Tomikowski.** Exercise and pregnancy. Study of the change in heart rate in pregnancy when performing standardized moderate exercise]. *J.Gynecol.Obstet.Biol.Reprod.* 1989. 18:295-302 |
| **E. Ha, S. I. Cho, H. Park, et al.** CME article #2: Does standing at work during pregnancy result in reduced infant birth weight?. *Journal of Occupational and Environmental Medicine.* 2002. 44:815-821 |
| **E. Ha, S. I. Cho, H. Park, et al.** Does standing at work during pregnancy result in reduced infant birth weight?. *Journal of Occupational & Environmental Medicine.* 2002. 44:815-821 |
| **E. Ha, S. I. Cho, H. Park, et al.** Does standing at work during pregnancy result in reduced infant birth weight?. 2002. 44:815-821 |
| **E. Haelterman, S. Marcoux, A. Croteau and M. Dramaix.** Population-based study on occupational risk factors for preeclampsia and gestational hypertension. *Scandinavian Journal of Work, Environment and Health.* 2007. 33:304-317 |
| **E. Haelterman, S. Marcoux, A. Croteau and M. Dramaix.** Population-based study on occupational risk factors for preeclampsia and gestational hypertension. 2007. 33:304-317 |
| **E. Heery, A. McConnon, C. C. Kelleher, P. G. Wall and F. M. McAuliffe.** PMC3827496; Perspectives on weight gain and lifestyle practices during pregnancy among women with a history of macrosomia: a qualitative study in the Republic of Ireland. *BMC Pregnancy & Childbirth.* 2013. 13:202 |
| **E. I. Florack, A. E. Pellegrino, G. A. Zielhuis and R. Rolland.** Influence of occupational physical activity on pregnancy duration and birthweight. *Scand.J.Work Environ.Health.* 1995. 21:199-207 |
| **E. I. Florack, A. E. Pellegrino, G. A. Zielhuis and R. Rolland.** Influence of occupational physical activity on pregnancy duration and birthweight. 1995. 21:199-207 |
| **E. I. Florack, G. A. Zielhuis, J. E. Pellegrino and R. Rolland.** Occupational physical activity and the occurrence of spontaneous abortion. 1993. 22:878-884 |
| **E. I. M. Florack, G. A. Zielhuis, J. E. M. C. Pellegrino and R. Rolland.** Occupational physical activity and the occurrence of spontaneous abortion. *Int.J.Epidemiol.* 1993. 22:878-884 |
| **E. J. Crenier and Y. Lambert.** [Influence of pre- and postnatal exercises on the abdominal wall]. 1975. 4:551-556 |
| **E. K. Rousham, P. E. Clarke and H. Gross.** Significant changes in physical activity among pregnant women in the UK as assessed by accelerometry and self-reported activity. *Eur.J.Clin.Nutr.* 2006. 60:393-400 |
| **E. K. Rousham, P. E. Clarke and H. Gross.** Significant changes in physical activity among pregnant women in the UK as assessed by accelerometry and self-reported activity. 2006. 60:393-400 |
| **E. Korpi-Hyovalti, S. Heinonen, U. Schwab, D. E. Laaksonen and L. Niskanen.** Effect of intensive counselling on physical activity in pregnant women at high risk for gestational diabetes mellitus. A clinical study in primary care. *Primary care diabetes.* 2012. 6:261-268 |
| **E. Korpi-Hyovalti, S. Heinonen, U. Schwab, D. E. Laaksonen and L. Niskanen.** Effect of intensive counselling on physical activity in pregnant women at high risk for gestational diabetes mellitus. A clinical study in primary care. 2012. 6:261-268 |
| **E. L. LeMoyne, D. Curnier and D. Ellemberg.** Pregnancy and cognition: deficits in inhibition are unrelated to changes in fitness. *Journal of clinical and experimental neuropsychology.* 2014. 36:178-185 |
| **E. L. LeMoyne, D. Curnier and D. Ellemberg.** Pregnancy and cognition: deficits in inhibition are unrelated to changes in fitness. 2014. 36:178-185 |
| **E. L. Rauff and D. S. Downs.** Mediating effects of body image satisfaction on exercise behavior, depressive symptoms, and gestational weight gain in pregnancy. 2011. 42:381-390 |
| **E. M. Alfadhli, E. N. Osman, T. H. Basri, et al.** Gestational diabetes among Saudi women: prevalence, risk factors and pregnancy outcomes. *Annals of Saudi Medicine.* 2015. 35:222-230 |
| **E. M. Alfadhli, E. N. Osman, T. H. Basri, et al.** Gestational diabetes among Saudi women: prevalence, risk factors and pregnancy outcomes. 2015. 35:222-230 |
| **E. M. Ekholm, S. J. Piha, R. U. Erkkola and K. J. Antila.** Autonomic cardiovascular reflexes in pregnancy. A longitudinal study. *Clinical Autonomic Research.* 1994. 4:161-165 |
| **E. Mocevic, S. W. Svendsen, K. T. Joorgensen, P. Frost and J. P. Bonde.** Occupational lifting, fetal death and preterm birth: Findings from the Danish National Birth Cohort using a job exposure matrix. *PLoS ONE.* 2014. 9: |
| **E. Mocevic, S. W. Svendsen, K. T. Joorgensen, P. Frost and J. P. Bonde.** Occupational lifting, fetal death and preterm birth: Findings from the Danish National Birth Cohort using a job exposure matrix. 2014. 9: |
| **E. Nethery, M. Brauer and P. Janssen.** Time-activity patterns of pregnant women and changes during the course of pregnancy. 2009. 19:317-324 |
| **E. O. Im, W. Chee, H. J. Lim, Y. Liu and H. K. Kim.** Midlife women's attitudes toward physical activity. *JOGNN - Journal of Obstetric, Gynecologic, and Neonatal Nursing.* 2008. 37:203-213 |
| **E. Oken, Y. Ning, S. L. Rifas-Shiman, J. S. Radesky, J. W. Rich-Edwards and M. W. Gillman.** Associations of physical activity and inactivity before and during pregnancy with glucose tolerance. 2006. 108:1200-1207 |
| **E. Oken, Y. Ning, S. Rifas-Shiman, J. S. Radesky, J. Rich-Edwards and M. W. Gillman.** NIHMS21783 PMC1894947; Associations of physical activity and inactivity before and during pregnancy with glucose tolerance. *Obstetrics & Gynecology.* 2006. 108:1200-1207 |
| **E. P. Baciuk, R. I. Pereira, J. G. Cecatti, A. F. Braga and S. R. Cavalcante.** PMC2613131; Water aerobics in pregnancy: Cardiovascular response, labor and neonatal outcomes. *Reproductive Health.* 2008. 5:10 |
| **E. P. Durak, L. Jovanovic-Peterson and C. M. Peterson.** Comparative evaluation of uterine response to exercise on five aerobic machines. 1990. 162:754-756 |
| **E. Petrella, M. Malavolti, V. Bertarini, et al.** Gestational weight gain in overweight and obese women enrolled in a healthy lifestyle and eating habits program. *Journal of Maternal-Fetal & Neonatal Medicine.* 2014. 27:1348-1352 |
| **E. Petrella, M. Malavolti, V. Bertarini, et al.** Gestational weight gain in overweight and obese women enrolled in a healthy lifestyle and eating habits program. 2014. 27:1348-1352 |
| **E. Petridou, H. Salvanos, A. Skalkidou, N. Dessypris, M. Moustaki and D. Trichopoulos.** Are there common triggers of preterm deliveries?. 2001. 108:598-604 |
| **E. Rutkowska and C. Lepecka-Klusek.** The role of physical activity in preparing women for pregnancy and delivery in Poland. 2002. 23:919-923 |
| **E. S. Ji and H. R. Han.** The effects of Qi exercise on maternal/fetal interaction and maternal well-being during pregnancy. *JOGNN - Journal of Obstetric, Gynecologic, & Neonatal Nursing.* 2010. 39:310-318 |
| **E. S. Ji and H. R. Han.** The effects of Qi exercise on maternal/fetal interaction and maternal well-being during pregnancy. 2010. 39:310-318 |
| **E. S. Lindholm, M. Norman, C. P. Kilander and D. Altman.** Weight control program for obese pregnant women. *Acta Obstet.Gynecol.Scand.* 2010. 89:840-843 |
| **E. T. Reilly, R. M. Freeman, M. R. Waterfield, A. E. Waterfield, P. Steggles and F. Pedlar.** Prevention of postpartum stress incontinence in primigravidae with increased bladder neck mobility: a randomised controlled trial of antenatal pelvic floor exercises. 2014. 121 Suppl 7:58-66 |
| **E. Thorell and P. Kristiansson.** Pregnancy related back pain, is it related to aerobic fitness? A longitudinal cohort study. 2012. 12:30 |
| **E. Thorell, K. Svardsudd, K. Andersson and P. Kristiansson.** Moderate impact of full-term pregnancy on estimated peak oxygen uptake, physical activity and perceived health. *Acta Obstet.Gynecol.Scand.* 2014. 89:1140-1148 |
| **E. Thorell, L. Goldsmith, G. Weiss and P. Kristiansson.** Physical fitness, serum relaxin and duration of gestation. 2015. 15:168 |
| **E. Thorell, L. Goldsmith, G. Weiss and P. Kristiansson.** PMC4536895; Physical fitness, serum relaxin and duration of gestation. *BMC Pregnancy & Childbirth.* 2015. 15:168 |
| **E. Tlapáková, K. Jelen and M. Minař**. The relationship between pelvis inclination, exercise and low back pain (LBP) during pregnancy. 2011. 41:15-21 |
| **E. V. Bennett, C. E. McEwen, L. H. Clarke, K. A. Tamminen and P. R. E. Crocker.** 'It's all about modifying your expectations': Women's experiences with physical activity during pregnancy. 2013. 5:267-286 |
| **E. V. Espel, L. M. Glynn, C. A. Sandman and E. P. Davis.** PMC4244187; Longer gestation among children born full term influences cognitive and motor development. *PLoS ONE Electronic Resource].* 2014. 9:e113758 |
| **E. V. Tyldum, P. R. Romundstad and S. A. Slordahl.** Pre-pregnancy physical activity and preeclampsia risk: a prospective population-based cohort study. *Acta Obstet.Gynecol.Scand.* 2010. 89:315-320 |
| **E. V. Tyldum, P. R. Romundstad and S. A. Slordahl.** Pre-pregnancy physical activity and preeclampsia risk: a prospective population-based cohort study. 2010. 89:315-320 |
| **E. W. Reid, J. A. McNeill, F. A. Alderdice, M. A. Tully and V. A. Holmes.** Physical activity, sedentary behaviour and fetal macrosomia in uncomplicated pregnancies: a prospective cohort study. *Midwifery.* 2014. 30:1202-1209 |
| **E. Weallens, A. Clark, P. MacIntyre and M. Gaudoin.** A survey of exercise patterns in primigravidae at a Scottish NHS trust: More consistent support and advice required for women and their families. *Health Educ.J.* 2003. 62:234-245 |
| **E. Weallens, A. Clark, P. MacIntyre and M. Gaudoin.** A survey of exercise patterns in primigravidae at a Scottish NHS trust: More consistent support and advice required for women and their families. 2003. 62:234-245 |
| **E. Wergeland, K. Strand and P. E. Bordahl.** Strenuous working conditions and birthweight, Norway 1989. *Acta Obstet.Gynecol.Scand.* 1998. 77:263-271 |
| **E. Wergeland, K. Strand and P. E. Bordahl.** Strenuous working conditions and birthweight, Norway 1989. 1998. 77:263-271 |
| **E. White, J. Pivarnik and K. Pfeiffer.** Resistance training during pregnancy and perinatal outcomes. *Journal of Physical Activity & Health.* 2014. 11:1141-1148 |
| **E. Y. Wong, R. Ray, D. L. Gao, et al.** Physical activity, physical exertion, and miscarriage risk in Women textile Workers in Shanghai, china. *Am.J.Ind.Med.* 2010. 53:497-505 |
| **E. Y. Wong, R. Ray, D. L. Gao, et al.** Physical activity, physical exertion, and miscarriage risk in women textile workers in Shanghai, China. 2010. 53:497-505 |
| **E. Zaharieva.** Olympic participation by women. Effects on pregnancy and childbirth. *JAMA.* 1972. 221:992-995 |
| **El Metwalli, A. G. A., A. M. Badawy, L. A. El Baghdadi and A. El Wehady.** Occupational physical activity and pregnancy outcome. *European Journal of Obstetrics Gynecology and Reproductive Biology.* 2001. 100:41-45 |
| **Elaine S. Marshall, Bridget Melton, Helen Bland and Jacquelyn Nagle.** Physical Activity and Muscular Strengthening in Pregnancy: A Rural Urban Comparison. 2013. 13:50-65 16 |
| **Eman Mohammed Alfadhli, Eman Naguib Osman, Taghreed Hamza Basri, et al.** Gestational diabetes among Saudi women: prevalence, risk factors and pregnancy outcomes. *Annals of Saudi Medicine.* 2015. 35:222-230 |
| **Erica P. Gunderson, Charles P. Quesenberry Jr., Cora E. Lewis, et al.** Development of Overweight Associated with Childbearing Depends on Smoking Habit: The Coronary Artery Risk Development in Young Adults (CARDIA) Study. 2004. 12:2041-2053 |
| **F. Aliaga-Martinez, E. Prats-Ribera, M. Alsina-Hlipolito and A. Allepuz-Palau.** Impact on the function of the pelvic floor muscles of a specific training program included in the routine monitoring of pregnancy and postpartum non-randomized controlled trial. Spanish]. *Matronas Profesion.* 2013. 14:36-44 |
| **F. Aliaga-Martinez, E. Prats-Ribera, M. Alsina-Hlipolito and A. Allepuz-Palau.** Impact on the function of the pelvic floor muscles of a specific training program included in the routine monitoring of pregnancy and postpartum non-randomized controlled trial. [Spanish]. 2013. 14:36-44 |
| **F. Doran and A. P. O'Brien.** A brief report of attitudes towards physical activity during pregnancy. *Health Promotion Journal of Australia.* 2007. 18:155-158 |
| **F. Doran and K. Davis.** Factors that influence physical activity for pregnant and postpartum women and implications for primary care. *Australian Journal of Primary Health.* 2011. 17:79-85 |
| **F. Doran.** Gestational diabetes mellitus: Perspectives on lifestyle changes during pregnancy and post-partum, physical activity and the prevention of future type 2 diabetes. 2008. 14:85-92 |
| **F. Ebrahimi, Z. M. Shariff, S. Z. Tabatabaei, M. S. Fathollahi, C. Y. Mun and M. Nazari.** Relationship between sociodemographics, dietary intake, and physical activity with gestational weight gain among pregnant women in Rafsanjan City, Iran. 2015. 33:168-176 |
| **F. K. Lotgering, A. van den Berg, P. C. Struijk and H. C. Wallenburg.** Arterial pressure response to maximal isometric exercise in pregnant women. 1992. 166:538-542 |
| **F. K. Lotgering, M. B. van Doorn, P. C. Struijk, J. Pool and H. C. Wallenburg.** Maximal aerobic exercise in pregnant women: heart rate, O2 consumption, CO2 production, and ventilation. 1991. 70:1016-1023 |
| **F. K. Lotgering, P. C. Struijk, M. B. van Doorn, W. E. Spinnewijn and H. C. Wallenburg.** Anaerobic threshold and respiratory compensation in pregnant women. 1995. 78:1772-1777 |
| **F. K. Lotgering, W. E. Spinnewijn, P. C. Struijk, F. Boomsma and H. C. Wallenburg.** Respiratory and metabolic responses to endurance cycle exercise in pregnant and postpartum women. 1998. 19:193-198 |
| **F. M. Doran and N. A. Buckley.** Walking patterns in pregnancy. *Australian Journal of Primary Health.* 2013. 19:213-218 |
| **F. M. Kovacs, E. Garcia, A. Royuela, L. Gonzalez, V. Abraira and Spanish Back Pain Research, Network.** Prevalence and factors associated with low back pain and pelvic girdle pain during pregnancy: a multicenter study conducted in the Spanish National Health Service. 2012. 37:1516-1533 |
| **F. Mohammadi, J. Malakooti, J. Babapoor and S. Mohammad-Alizadeh-Charandabi.** The effect of a home-based exercise intervention on postnatal depression and fatigue: A randomized controlled trial. 2015. 21:478-485 |
| **F. Momeni Javid, M. Simbar, M. Dolatian and H. Alavi Majd.** Comparison of lifestyles of women with gestational diabetes and healthy pregnant women. *Global Journal of Health Science.* 2015. 7:162-169 |
| **F. Momeni Javid, M. Simbar, M. Dolatian and H. Alavi Majd.** Comparison of lifestyles of women with gestational diabetes and healthy pregnant women. 2015. 7:162-169 |
| **F. Nasiri-Amiri, A. Bakhtiari, M. Faramarzi, H. Adib Rad and H. Pasha.** The Association Between Physical Activity During Pregnancy and Gestational Diabetes Mellitus: A Case-Control Study. *International Journal of Endocrinology and Metabolism.* 2016. 14:e37123 |
| **F. O. Omokhodion, M. O. Onadeko, O. A. Roberts, J. R. Beach, I. Burstyn and N. M. Cherry.** Paid work, domestic work, and other determinants of pregnancy outcome in Ibadan, southwest Nigeria. *International Journal of Gynaecology & Obstetrics.* 2010. 111:165-170 |
| **F. O. Omokhodion, M. O. Onadeko, O. A. Roberts, J. R. Beach, I. Burstyn and N. M. Cherry.** Paid work, domestic work, and other determinants of pregnancy outcome in Ibadan, southwest Nigeria. 2010. 111:165-170 |
| **F. P. McCarthy, A. S. Khashan, D. Murray, et al.** Parental physical and lifestyle factors and their association with newborn body composition. *BJOG: An International Journal of Obstetrics and Gynaecology.* 2016. 123:1824-1829 |
| **F. Sehati Shafayi, M. Akef, H. Sadegi and A. Sallakh Niknazhad.** PMC3825354; A Comparison of Physical Activity and Nutritional Practices in Hypertensive and Non- hypertensive Pregnant Women. *Journal of Cardiovascular & Thoracic Research.* 2012. 4:53-56 |
| **F. Shobeiri and K. Begum.** Physical activity and pregnancy outcome among Indian women belonging to high socioeconomic families. *Journal of Postgraduate Medical Institute.* 2005. 19:125-129 |
| **F. Shobeiri and K. Begum.** Physical activity and pregnancy outcome among Indian women belonging to high socioeconomic families. 2005. 19:125-129 |
| **Fahimeh Sehati Shafayi, Maryam Akef, Homayoon Sadegi and Akram sallakh Niknazhad.** A Comparison of Physical Activity and Nutritional Practices in Hypertensive and Non- hypertensive Pregnant Women. 2012. 4:53-56 4 |
| **Fernandes da Mota, P. G., A. G. Pascoal, A. I. Carita and K. Bo.** Prevalence and risk factors of diastasis recti abdominis from late pregnancy to 6 months postpartum, and relationship with lumbo-pelvic pain. 2015. 20:200-205 |
| **G. A. Dumas, J. G. Reid, L. A. Wolfe, M. P. Griffin and M. J. McGrath.** Exercise, posture, and back pain during pregnancy. Part 1. Exercise and posture. 1995. 10:98-103 |
| **G. A. Hackett, T. Cohen-Overbeek and S. Campbell.** The effect of exercise on uteroplacental Doppler waveforms in normal and complicated pregnancies. *Obstetrics & Gynecology.* 1992. 79:919-923 |
| **G. Ahlborg Jr.** Physical work load and pregnancy outcome. 1995. 37:941-944 |
| **G. C. Di Renzo, I. Giardina, A. Rosati, et al.** Maternal risk factors for preterm birth: a country-based population analysis. *European Journal of Obstetrics, Gynecology, & Reproductive Biology.* 2011. 159:342-346 |
| **G. C. Di Renzo, I. Giardina, A. Rosati, et al.** Maternal risk factors for preterm birth: a country-based population analysis. 2011. 159:342-346 |
| **G. Candido, T. Lo and P. A. Janssen.** Risk factors for diastasis of the recti abdominis. 2005. 49-54 6 |
| **G. Cito, S. Luisi, A. Mezzesimi, C. Cavicchioli, G. Calonaci and F. Petraglia.** Maternal position during non-stress test and fetal heart rate patterns. 2005. 84:335-338 |
| **G. Cuco, V. Arija, R. Iranzo, J. Vila, M. T. Prieto and J. Fernandez-Ballart.** Association of maternal protein intake before conception and throughout pregnancy with birth weight. 2006. 85:413-421 |
| **G. Eriksen, M. Wohlert, V. Ersbak, L. Hvidman, M. Hedegaard and K. Skajaa.** Placental abruption. A case-control investigation. 1991. 98:448-452 |
| **G. Jans, L. Ameye, C. Matthys, et al.** Does lifestyle coaching affect diet and physical activity stage of change scores in obese pregnant women? Pilot observations from the European DALI project. *Obesity Facts.* 2014. 7:132 |
| **G. Laura, L. Gianfranco and G. Donatella.** Pelvic floor muscle training during pregnancy to prevent urinary pelvic floor dysfunctions. *Neurourol.Urodyn.* 2010. 29:64-65 |
| **G. Lee, S. Challenger, M. McNabb and M. Sheridan.** A randomised controlled trial on exercise in pregnancy. 1996. |
| **G. M. Dado, P. B. Dobrin and R. S. Mrkvicka.** Venous flow through coiled and noncoiled umbilical cords. Effects of external compression, twisting and longitudinal stretching. *J.Reprod.Med.* 1997. 42:576-580 |
| **G. M. Egeland, K. Klungsoyr, N. Oyen, G. S. Tell, O. Naess and R. Skjaerven.** Preconception cardiovascular risk factor differences between gestational hypertension and preeclampsia: Cohort Norway study. *Hypertension.* 2016. 67:1173-1180 |
| **G. N. Bedell and R. W. Adams.** Pulmonary Diffusing Capacity during Rest and Exercise. A Study of Normal Persons and Persons with Atrial Septal Defect, Pregnancy, and Pulmonary Disease. 1962. 41:1908-1914 |
| **G. N. Brankston, B. F. Mitchell, E. A. Ryan and N. B. Okun.** Resistance exercise decreases the need for insulin in overweight women with gestational diabetes mellitus. *American Journal of Obstetrics & Gynecology.* 2004. 190:188-193 |
| **G. N. Brankston, B. F. Mitchell, E. A. Ryan and N. B. Okun.** Resistance exercise decreases the need for insulin in overweight women with gestational diabetes mellitus. 2004. 190:188-193 |
| **G. Nagel, M. Wabitsch, C. Galm, et al.** Determinants of obesity in the Ulm Research on Metabolism, Exercise and Lifestyle in Children (URMEL-ICE). 2009. 168:1259-1267 |
| **G. Ramirez, R. M. Grimes, J. F. Annegers, B. R. Davis and C. H. Slater.** Occupational physical-activity and other risk-factors for preterm birth among united-states-army primigravidas. *Am.J.Public Health.* 1990. 80:728-729 |
| **G. Ramirez, R. M. Grimes, J. F. Annegers, B. R. Davis and C. H. Slater.** PMC1404715; Occupational physical activity and other risk factors for preterm birth among US Army primigravidas. *Am.J.Public Health.* 1990. 80:728-730 |
| **G. Ramirez, R. M. Grimes, J. F. Annegers, B. R. Davis and C. H. Slater.** Occupational physical activity and other risk factors for preterm birth among US Army primigravidas. 1990. 80:728-730 |
| **G. Risvas, I. Papaioannou, D. B. Panagiotakos, P. Farajian, V. Bountziouka and A. Zampelas.** Perinatal and family factors associated with preadolescence overweight/obesity in Greece: the GRECO study. 2012. 2:145-153 |
| **G. S. Berkowitz, J. L. Kelsey, T. R. Holford and R. L. Berkowitz.** Physical activity and the risk of spontaneous preterm delivery. *J.Reprod.Med.* 1983. 28:581-588 |
| **G. S. Berkowitz.** An epidemiologic study of preterm delivery. 1981. 113:81-92 |
| **G. Torres-Luque, L. Torres-Luque, S. Garc**. Seguimiento de un programa de actividad f. 2012. 11:84-92 |
| **G. Varrassi, C. Bazzano and W. T. Edwards.** Effects of physical activity on maternal plasma beta-endorphin levels and perception of labor pain. 1989. 160:707-712 |
| **G. Xu, Y. Wu, L. Yang, et al.** Risk factors for early miscarriage among Chinese: a hospital-based case-control study. *Fertility & Sterility.* 2014. 101:1663-1670 |
| **G. Xu, Y. Wu, L. Yang, et al.** Risk factors for early miscarriage among Chinese: a hospital-based case-control study. 2014. 101:1663-1670 |
| **G. Zhao, E. S. Ford, J. Tsai, et al.** Trends in health-related behavioral risk factors among pregnant women in the United States: 2001-2009. 2012. 21:255-263 |
| **Gema Torres-Luque, Luc**. Empleo del poms durante un programa de actividad física en el medio acuático para mujeres embarazadas. / use of the poms during a physical activity program in aquatic environment for pregnant women. 2010. 10:37-45 |
| **Glasgow University of, Scottish Collaboration for Public Health, Research and Policy.** Mellow Bumps RCT - Antenatal Intervention for Vulnerable Women. 2013. |
| **Guglielmina Fantuzzi, Elena Righi and Gabriella Aggazzotti.** A Case-Control Study on Leisure Time Physical Activity (LTPA) during the Last Three Months of Pregnancy and Foetal Outcomes in Italy. *Health (1949-4998).* 2016. 8:133-143 11p |
| **H. A. Hausenblas, B. W. Brewer, J. L. Van Raalte, et al.** Development and evaluation of a multimedia CD-ROM for exercise during pregnancy and postpartum. 2008. 70:215-219 |
| **H. Baumann, A. Huch and R. Huch.** Doppler sonographic evaluation of exercise-induced blood flow velocity and waveform changes in fetal, uteroplacental and large maternal vessels in pregnant women. *J.Perinat.Med.* 1989. 17:279-287 |
| **H. C. Ostgaard, G. Zetherstrom, E. Roos-Hansson and B. Svanberg.** Reduction of back and posterior pelvic pain in pregnancy. 1994. 19:894-900 |
| **H. Cramer, J. Frawley, A. Steel, et al.** Characteristics of women who practice yoga in different locations during pregnancy. 2015. 5:e008641 |
| **H. D. Junge.** Behavioral states and state related heart rate and motor activity patterns in the newborn infant and the fetus antepartum -- a comparative study. I. Technique, illustration of recordings, and general results. 1979. 7:85-107 |
| **H. D. Junge.** Behavioral states and state-related heart rate and motor activity patterns in the newborn infant and the fetus ante partum. A comparative study. III. Analysis of sleep state-related motor activity patterns. 1980. 10:239-246 |
| **H. Dahlstrom and K. Ihrman.** A clinical and physiological study of pregnancy in a material from northern Sweden. V. The results of work tests during and after pregnancy. 1960. 65:305-314 |
| **H. E. Harris, G. T. Ellison and S. Clement.** Do the psychosocial and behavioral changes that accompany motherhood influence the impact of pregnancy on long-term weight gain?. 1999. 20:65-79 |
| **H. Elden, H. Hagberg, M. F. Olsen, L. Ladfors and H. C. Ostgaard.** Regression of pelvic girdle pain after delivery: follow-up of a randomised single blind controlled trial with different treatment modalities. 2008. 87:201-208 |
| **H. Elden, H. Ostgaard, M. Fagevik-Olsen, L. Ladfors and H. Hagberg.** Treatment of pelvic girdle pain in pregnant women: adverse effects of standard treatment, acupuncture and stabilising exercises on the pregnancy, mother, delivery and the fetus/neonate. *BMC Complementary & Alternative Medicine.* 2008. 8:13p-13p 1p |
| **H. Elden, L. Ladfors, M. F. Olsen, H. C. Ostgaard and H. Hagberg.** Effects of acupuncture and stabilising exercises as adjunct to standard treatment in pregnant women with pelvic girdle pain: randomised single blind controlled trial. 2005. 330:761 |
| **H. G. Knuttgen and K. Emerson Jr.** Physiological response to pregnancy at rest and during exercise. *J.Appl.Physiol.* 1974. 36:549-553 |
| **H. G. Knuttgen and K. Emerson Jr.** Physiological response to pregnancy at rest and during exercise. 1974. 36:549-553 |
| **H. H. Kim, A. Nava-Ocampo, S. K. Kim, et al.** Is prenatal childbirth preparation effective in decreasing adverse maternal and neonatal response to labor? A nested case-control study. *Acta Bio-Medica de l Ateneo Parmense.* 2008. 79:18-22 |
| **H. Hausenblas, D. S. Downs, P. Giacobbi, D. Tuccitto and B. Cook.** A multilevel examination of exercise intention and behavior during pregnancy. 2008. 66:2555-2561 |
| **H. Hausenblas, P. Giacobbi, B. Cook, R. Rhodes and A. Cruz.** Prospective examination of pregnant and nonpregnant women's physical activity beliefs and behaviours. *Journal of Reproductive and Infant Psychology.* 2011. 29:308-319 |
| **H. Jiang, X. Qian, M. Li, et al.** Can physical activity reduce excessive gestational weight gain? Findings from a Chinese urban pregnant women cohort study. *International Journal of Behavioral Nutrition and Physical Activity.* 2012. 9: |
| **H. K. Hegaard, B. Ottesen, M. Hedegaard, et al.** The association between leisure time physical activity in the year before pregnancy and pre-eclampsia. *Journal of Obstetrics & Gynaecology.* 2010. 30:21-24 |
| **H. K. Hegaard, B. Ottesen, M. Hedegaard, et al.** The association between leisure time physical activity in the year before pregnancy and pre-eclampsia. 2010. 30:21-24 |
| **H. K. Hegaard, K. Petersson, M. Hedegaard, et al.** Sports and leisure-time physical activity in pregnancy and birth weight: a population-based study. *Scand.J.Med.Sci.Sports.* 2010. 20:e96-102 |
| **H. K. Hegaard, K. Petersson, M. Hedegaard, et al.** Sports and leisure-time physical activity in pregnancy and birth weight: a population-based study. 2010. 20:e96-102 |
| **H. K. Hegaard, M. Hedegaard, P. Damm, B. Ottesen, K. Petersson and T. B. Henriksen.** Leisure time physical activity is associated with a reduced risk of preterm delivery. *American Journal of Obstetrics & Gynecology.* 2008. 198:180.e1-180.e5 |
| **H. K. Hegaard, P. Damm, M. Hedegaard, et al.** Sports and leisure time physical activity during pregnancy in nulliparous women. *Maternal & Child Health Journal.* 2011. 15:806-813 |
| **H. K. Hegaard, P. Damm, M. Hedegaard, et al.** Sports and leisure time physical activity during pregnancy in nulliparous women. 2011. 15:806-813 |
| **H. Kahyaoglu Sut and P. Balkanli Kaplan.** Effect of pelvic floor muscle exercise on pelvic floor muscle activity and voiding functions during pregnancy and the postpartum period. 2015. |
| **H. Kahyaoglu Sut and P. Balkanli Kaplan.** Effect of pelvic floor muscle exercise on pelvic floor muscle activity and voiding functions during pregnancy and the postpartum period. *Neurourology & Urodynamics.* 2016. 35:417-422 |
| **H. Kahyaoglu Sut and P. Balkanli Kaplan.** Effect of pelvic floor muscle exercise on pelvic floor muscle activity and voiding functions during pregnancy and the postpartum period. *Neurourol.Urodyn.* 2016. 35:417-422 |
| **H. Kirkegaard, H. Stovring, K. M. Rasmussen, B. Abrams, T. I. Sorensen and E. A. Nohr.** Maternal weight change from prepregnancy to 7 years postpartum--the influence of behavioral factors. 2015. 23:870-878 |
| **H. Klomp, R. F. Dyck and S. Sheppard.** Description and evaluation of a prenatal exercise program for urban aboriginal women. *Canadian Journal of Diabetes.* 2003. 27:231-238 |
| **H. Klomp, R. F. Dyck and S. Sheppard.** Description and evaluation of a prenatal exercise program for urban aboriginal women. 2003. 27:231-238 |
| **H. Kobe, A. Nakai, T. Koshino and T. Araki.** Effect of regular maternal exercise on lipid peroxidation levels and antioxidant enzymatic activities before and after delivery. 2002. 69:542-548 |
| **H. M. Whitford, B. Alder and M. Jones.** A cross-sectional study of knowledge and practice of pelvic floor exercises during pregnancy and associated symptoms of stress urinary incontinence in North-East Scotland. 2007. 23:204-217 |
| **H. Medek, T. Halldorsson, I. Gunnarsdottir and R. T. Geirsson.** Physical activity of relatively high intensity in mid-pregnancy predicts lower glucose tolerance levels. *Acta Obstet.Gynecol.Scand.* 2016. 26:26 |
| **H. Medek, T. Halldorsson, I. Gunnarsdottir and R. T. Geirsson.** Physical activity of relatively high intensity in mid-pregnancy predicts lower glucose tolerance levels. *Acta Obstet.Gynecol.Scand.* 2016. 26:26 |
| **H. Medek, T. Halldorsson, I. Gunnarsdottir and R. T. Geirsson.** Physical activity of relatively high intensity in mid-pregnancy predicts lower glucose tolerance levels. *Acta Obstet.Gynecol.Scand.* 2016. 95:1055-1062 |
| **H. Mendieta Zeron, A. Garduno Alanis, P. Montserrat Nava Diaz, J. Guadalupe Santillan Benitez, De La Rosa and G. Conzuelo Rodriguez.** Low activity in pregnancy does not modify neither adiponectin nor leptin serum levels. 2013. 172:773-779 |
| **H. N. Soultanakis, R. Artal and R. A. Wiswell.** Prolonged exercise in pregnancy: glucose homeostasis, ventilatory and cardiovascular responses. *Semin.Perinatol.* 1996. 20:315-327 |
| **H. N. Soultanakis, R. Artal and R. A. Wiswell.** Prolonged exercise in pregnancy: glucose homeostasis, ventilatory and cardiovascular responses. 1996. 20:315-327 |
| **H. N. Winn, O. Hess, I. Goldstein, F. Wackers and J. C. Hobbins.** Fetal responses to maternal exercise: effect on fetal breathing and body movement. *Am.J.Perinatol.* 1994. 11:263-266 |
| **H. Prapavessis, S. De Jesus, T. Harper, et al.** The effects of acute exercise on tobacco cravings and withdrawal symptoms in temporary abstinent pregnant smokers. 2014. 39:703-708 |
| **H. R. Murphy, K. Kumareswaran, J. M. Allen, et al.** Closed loop insulin delivery protects against nocturnal hypoglycaemia after moderate physical activity in pregnant women with Type 1 diabetes. *Diabetic Med.* 2011. 28:18 |
| **H. Taskinen, P. Kyyronen and K. Hemminki.** Effects of ultrasound, shortwaves, and physical exertion on pregnancy outcome in physiotherapists. 1990. 44:196-201 |
| **H. Taskinen, P. Kyyronen and K. Hemminki.** PMC1060641; Effects of ultrasound, shortwaves, and physical exertion on pregnancy outcome in physiotherapists. *Journal of Epidemiology & Community Health.* 1990. 44:196-201 |
| **H. Volejnikova, K. Janku, M. Cernoch and J. Buzkova.** The influence of exercise on the course of confinement in pregnant woman with cardiopathies. Czech]. *Rehabilitacia.* 1984. 17:37-40 |
| **H. Volejnikova, K. Janku, M. Cernoch and J. Buzkova.** The influence of exercise on the course of confinement in pregnant woman with cardiopathies. *Rehabilitacia.* 1984. 17:37-40 |
| **H. Y. Yong, Z. Mohd Shariff, S. J. Koo and N. S. Binti Sa'ari.** Pre-pregnancy body mass index, height and physical activity are associated with rate of gestational weight gain among Malaysian mothers. *Journal of Obstetrics & Gynaecology Research.* 2016. 26:26 |
| **Hanan E-Mekawy, Adly Ali Sabbour and Mohamed Mostafa Radwan.** Effect of Antenatal Exercises on Umbilical Blood Flow and Neonate Wellbeing in Diabetic Pregnant Women. *Indian Journal of Physiotherapy & Occupational Therapy.* 2012. 6:121-125 5p |
| **Heather A. Hausenblas and Danielle Symons Downs.** Prospective Examination of Leisure-Time Exercise Behavior During Pregnancy. 2005. 17:240-246 |
| **Heather Jeffcoat.** Perinatal Wellness. Top 5 Pregnancy Exercises for Low Back Pain. 2011. 26:9-10 2 |
| **Hora Soltani, Alexandra M. S. Duxbury, Madelynne A. Arden, Andy Dearden, Penny J. Furness and Carolyn Garland.** Maternal Obesity Management Using Mobile Technology: A Feasibility Study to Evaluate a Text Messaging Based Complex Intervention during Pregnancy. 2015. 2015:1-10 10 |
| **I. A. Santos, R. Stein, S. C. Fuchs, et al.** Aerobic exercise and submaximal functional capacity in overweight pregnant women: a randomized trial. *Obstetrics & Gynecology.* 2005. 106:243-249 |
| **I. A. Santos, R. Stein, S. C. Fuchs, et al.** Aerobic exercise and submaximal functional capacity in overweight pregnant women: a randomized trial. 2005. 106:243-249 |
| **I. Danielsen, C. Granstrom, D. Rytter, et al.** Does physical activity during pregnancy adversely influence markers of the metabolic syndrome in adult offspring? A prospective study over two decades. *Journal of Epidemiology & Community Health.* 2013. 67:648-654 |
| **I. Esteban-Cornejo, D. Martinez-Gomez, C. Tejero-Gonzalez, et al.** Maternal physical activity before and during the prenatal period and the offspring's academic performance in youth. The UP&DOWN study. *Journal of Maternal-Fetal & Neonatal Medicine.* 2016. 29:1414-1420 |
| **I. Finkelstein, A. C. Kanitz, R. Bgeginski, et al.** Comparison of the rating of perceived exertion and oxygen uptake during exercise between pregnant and non-pregnant women and between water and land-based exercises. *Revista Brasileira de Medicina do Esporte.* 2012. 18:13-16 |
| **I. Finkelstein, A. C. Kanitz, R. Bgeginski, et al.** Comparison of the rating of perceived exertion and oxygen uptake during exercise between pregnant and non-pregnant women and between water and land-based exercises. 2012. 18:13-16 |
| **I. Finkelstein, P. A. de Figueiredo, C. L. Alberton, R. Bgeginski, R. Stein and L. F. Kruel.** Cardiorespiratory responses during and after water exercise in pregnant and non-pregnant women. *Revista Brasileira de Ginecologia e Obstetricia.* 2011. 33:388-394 |
| **I. Finkelstein, Poli de Figueiredo, P. A., C. L. Alberton, R. Bgeginski, R. Stein and L. F. M. Kruel.** Cardiorespiratory responses during and after water exercise in pregnant and non-pregnant women. 2011. 33:388-394 |
| **I. Finkelstein, R. Bgeginski, De Figueiredo, P. A. P., C. L. Alberton, R. Stein and L. F. M. Kruel.** Cardiorespiratory responses of pregnant women during different types of exercise on land and in water. Portuguese]. *Rev.Bras.Med.* 2009. 66:174-177 |
| **I. Giroux, S. D. Inglis, S. Lander, S. Gerrie and M. F. Mottola.** Dietary intake, weight gain, and birth outcomes of physically active pregnant women: a pilot study. *Applied Physiology, Nutrition, & Metabolism = Physiologie Appliquee, Nutrition et Metabolisme.* 2006. 31:483-489 |
| **I. Guelinckx, R. Devlieger, P. Mullie and G. Vansant.** Effect of lifestyle intervention on dietary habits, physical activity, and gestational weight gain in obese pregnant women: a randomized controlled trial. *Am.J.Clin.Nutr.* 2010. 91:373-380 |
| **I. K. Brenner, L. A. Wolfe, M. Monga and M. J. McGrath.** Physical conditioning effects on fetal heart rate responses to graded maternal exercise. *Medicine & Science in Sports & Exercise.* 1999. 31:792-799 |
| **I. Kantola, T. Kaila and R. Erkkola.** Acute exercise- and drug-induced potassium shifts during pregnancy. 1994. 208:88-90 |
| **I. Kawabata, A. Nakai, A. Sekiguchi, Y. Inoue and T. Takeshita.** The effect of regular exercise training during pregnancy on postpartum brachial-ankle pulse wave velocity, a measure of arterial stiffness. 2012. 11:489-494 |
| **I. M. Claesson, A. Josefsson, M. Cedergren, et al.** Consumer satisfaction with a weight-gain intervention programme for obese pregnant women. 2008. 24:163-167 |
| **I. M. Claesson, S. Klein, G. Sydsjo and A. Josefsson.** Physical activity and psychological well-being in obese pregnant and postpartum women attending a weight-gain restriction programme. 2014. 30:11-16 |
| **I. M. Claesson, S. Klein, G. Sydsjö and A. Josefsson.** Physical activity and psychological well-being in obese pregnant and postpartum women attending a weight-gain restriction programme. *Midwifery.* 2014. 30:11-16 |
| **I. Marc, J. Plaisance, C. Rheaume, et al.** Correlates of maternal cardiorespiratory fitness in the early second trimester of pregnancy. *Canadian Journal of Diabetes.* 2011. 35 (2):181-182 |
| **I. N. McIntyre and N. A. Broadhurst.** Effective treatment of low back pain in pregnancy. 1996. 25:S65-7 1 |
| **I. Nygaard, T. Girts, N. H. Fultz, K. Kinchen, G. Pohl and B. Sternfeld.** Is urinary incontinence a barrier to exercise in women?. *Obstet.Gynecol.* 2005. 106:307-314 |
| **I. Raisanen, K. Salminen and T. Laatikainen.** Response of plasma immunoreactive beta-endorphin and corticotropin to isometric exercise in uncomplicated pregnancy and in pregnancy-induced hypertension. 1990. 35:119-124 |
| **I. Rauramo and M. Forss.** Effect of exercise on maternal hemodynamics and placental blood flow in healthy women. *Acta Obstet.Gynecol.Scand.* 1988. 67:21-25 |
| **I. Rauramo and M. Forss.** Effect of exercise on placental blood flow in pregnancies complicated by hypertension, diabetes or intrahepatic cholestasis. *Acta Obstet.Gynecol.Scand.* 1988. 67:15-20 |
| **I. Rauramo, B. Andersson, T. Laatikainen and J. Pettersson.** Stress hormones and placental steroids in physical exercise during pregnancy. *British Journal of Obstetrics & Gynaecology.* 1982. 89:921-925 |
| **I. Rauramo, K. Salminen and T. Laatikainen.** Release of beta-endorphin in response to physical exercise in non-pregnant and pregnant women. 1986. 65:609-612 |
| **I. Rauramo, S. Ilmonen, L. Viinikka and O. Ylikorkala.** Prostacyclin and thromboxane in pregnant and nonpregnant women in response to exercise. 1995. 85:1027-1030 |
| **I. Rauramo.** Effect of short-term physical exercise on foetal heart rate and uterine activity in normal and abnormal pregnancies. *Ann.Chir.Gynaecol.* 1987. 76:274-279 |
| **I. Szeto, D. Ma, F. Liu, et al.** The prevalence of excess weight gain, imbalanced dietary intake, and physical inactivity among pregnant women in urban areas of China. *Obesity Reviews.* 2014. 15:179 |
| **I. Tendais, B. Figueiredo, J. Mota and A. Conde.** Physical activity, health-related quality of life and depression during pregnancy. 2011. 27:219-228 |
| **I. W. Aitken.** Determinants of low birthweight among the Mendi of Sierra Leone: implications for medical and socio-economic strategies. 1990. 33:103-109 |
| **Iii J. F. Clapp and W. Kiess.** Effects of pregnancy and exercise on concentrations of the metabolic markers tumor necrosis factor alpha and leptin. *Obstet.Gynecol.* 2000. 182:300-306 |
| **Iii J. F. Clapp, B. Lopez and R. Harcar-Sevcik.** Neonatal behavioral profile of the offspring of women who continued to exercise regularly throughout pregnancy. *Obstet.Gynecol.* 1999. 180:91-94 |
| **Iii J. F. Clapp, S. Schmidt, A. Paranjape and B. Lopez.** Maternal insulin-like growth factor-I levels (IGF-I) reflect placental mass and neonatal fat mass. *Obstet.Gynecol.* 2004. 190:730-736 |
| **Iii J. F. Clapp.** Diet, exercise, and fete-placental growth. 1997. 260:101-108 |
| **Iii J. F. Clapp.** Effect of dietary carbohydrate on the glucose and insulin response to mixed caloric intake and exercise in both nonpregnant and pregnant women. *Diabetes Care.* 1998. 21:B107-B112 |
| **J. A. Carvajal, A. M. Delpiano, M. A. Cuello and J. A. Poblete.** Mechanical stretch increases brain natriuretic peptide production and secretion in the human fetal membranes. *Reproductive Sciences.* 2013. 20:597-604 |
| **J. A. Daniel, C. E. Dikki and W. Ibrahim.** Aerobic dance exercise improves blood glucose level in pregnant women with gestational diabetes mellitus. *African Journal for Physical, Health Education, Recreation & Dance.* 2014. 20:273-281 |
| **J. A. Daniel, C. E. Dikki and W. Ibrahim.** Aerobic dance exercise improves blood glucose level in pregnant women with gestational diabetes mellitus. 2014. 20:273-281 |
| **J. A. Grisso, D. M. Main, G. Chiu, E. S. Synder and J. H. Holmes.** Effects of physical activity and life-style factors on uterine contraction frequency. *Am.J.Perinatol.* 1992. 9:489-492 |
| **J. A. Grisso, D. M. Main, G. Chiu, E. S. Synder and J. H. Holmes.** Effects of physical activity and life-style factors on uterine contraction frequency. 1992. 9:489-492 |
| **J. A. Leiferman and K. R. Evenson.** The effect of regular leisure physical activity on birth outcomes. *Maternal & Child Health Journal.* 2003. 7:59-64 |
| **J. Bustamante, R. Ramirez-Velez, A. C. D. Aguilar, A. Czerniczyniec and S. Lores-Arnaiz.** Aerobic Exercise Training During Pregnancy Improves Mitochondrial Function In Human Placenta. *Med.Sci.Sports Exerc.* 2012. 44:746-746 |
| **J. C. Dempsey, C. L. Butler, T. K. Sorensen, et al.** A case-control study of maternal recreational physical activity and risk of gestational diabetes mellitus. *Diabetes Research & Clinical Practice.* 2004. 66:203-215 |
| **J. C. Dempsey, C. L. Butler, T. K. Sorensen, et al.** A case-control study of maternal recreational physical activity and risk of gestational diabetes mellitus. 2004. 66:203-215 |
| **J. C. Dempsey, T. K. Sorensen, I. M. Lee, et al.** Recreational physical activity during and before pregnancy and risk of gestational diabetes mellitus. *Am.J.Epidemiol.* 2003. 157:S75-S75 |
| **J. C. Dempsey, T. K. Sorensen, M. A. Williams, et al.** Prospective study of gestational diabetes mellitus risk in relation to maternal recreational physical activity before and during pregnancy. *Am.J.Epidemiol.* 2004. 159:663-670 |
| **J. C. Dempsey, T. K. Sorensen, M. A. Williams, et al.** Prospective study of gestational diabetes mellitus risk in relation to maternal recreational physical activity before and during pregnancy. 2004. 159:663-670 |
| **J. C. Eisenman, M. A. Sarzynski, J. Tucker and K. A. Heelan.** Maternal Prepregnancy Overweight and Offspring Fatness and Blood Pressure: Role of Physical Activity. *Pediatric Exercise Science.* 2010. 22:369-378 |
| **J. C. Hauth, L. C. Gilstrap 3 and K. Widmer.** Fetal heart rate reactivity before and after maternal jogging during the third trimester. *American Journal of Obstetrics & Gynecology.* 1982. 142:545-547 |
| **J. C. Jarrett 2 and W. N. Spellacy.** Jogging during pregnancy: an improved outcome?. *Obstetrics & Gynecology.* 1983. 61:705-709 |
| **J. C. Veille, A. E. Bacevice, B. Wilson, J. Janos and H. K. Hellerstein.** Umbilical artery waveform during bicycle exercise in normal pregnancy. *Obstetrics & Gynecology.* 1989. 73:957-960 |
| **J. C. Veille, A. R. Hohimer, K. Burry and L. Speroff.** The effect of exercise on uterine activity in the last eight weeks of pregnancy. *American Journal of Obstetrics & Gynecology.* 1985. 151:727-730 |
| **J. C. Veille, D. W. Kitzman and A. E. Bacevice.** Effects of pregnancy on the electrocardiogram in healthy subjects during strenuous exercise. *Obstet.Gynecol.* 1996. 175:1360-1364 |
| **J. C. Veille, D. W. Kitzman and A. E. Bacevice.** Effects of pregnancy on the electrocardiogram in healthy subjects during strenuous exercise. 1996. 175:1360-1364 |
| **J. C. Veille, D. W. Kitzman and A. E. Bacevice.** Effects of pregnancy on the electrocardiogram in healthy subjects during strenuous exercise. *Obstet.Gynecol.* 1996. 175:1360-1364 |
| **J. C. Veille, D. W. Kitzman, P. D. Millsaps and P. D. Kilgo.** Left ventricular diastolic filling response to stationary bicycle exercise during pregnancy and the postpartum period. 2001. 185:822-827 |
| **J. C. Veille, H. K. Hellerstein and A. E. Bacevice Jr.** Maternal left ventricular performance during bicycle exercise. 1992. 69:1506-1508 |
| **J. C. Veille, H. K. Hellerstein, B. Cherry and A. E. Bacevice Jr.** Effects of advancing pregnancy on left ventricular function during bicycle exercise. *Am.J.Cardiol.* 1994. 73:609-610 |
| **J. C. Veille, H. K. Hellerstein, B. Cherry and A. E. Bacevice Jr.** Effects of advancing pregnancy on left ventricular function during bicycle exercise. 1994. 73:609-610 |
| **J. C. Young and J. L. Treadway.** The effect of prior exercise on oral glucose tolerance in late gestational women. *Eur.J.Appl.Physiol.Occup.Physiol.* 1992. 64:430-433 |
| **J. C. Young and J. L. Treadway.** The effect of prior exercise on oral glucose tolerance in late gestational women. 1992. 64:430-433 |
| **J. Choi, J. H. Lee, E. Vittinghoff and Y. Fukuoka.** NIHMS743852 Available on 05/01/17] PMC4826820 Available on 05/01/17]; mHealth Physical Activity Intervention: A Randomized Pilot Study in Physically Inactive Pregnant Women. *Maternal & Child Health Journal.* 2016. 20:1091-1101 |
| **J. Delaney.** Participation in sports and exercise during pregnancy. 1995. 10:8-9 2 |
| **J. Dotlic, M. Terzic, D. Babic, et al.** Influence of lifestyle habits and behaviours on quality of life during pregnancy. 2012. 6:3987-3994 |
| **J. E. Martin, A. J. Hure, L. Macdonald-Wicks, R. Smith and C. E. Collins.** Predictors of post-partum weight retention in a prospective longitudinal study. 2014. 10:496-509 |
| **J. Erneszt and L. Szanyi.** Experimentation for determination of the loading capacity of cardiopathic pregnant women with analysis of the carotid pulse curve during pregnancy]. *Minerva Ginecol.* 1972. 24:1-5 |
| **J. F. Clapp 3 and Clapp,James F.,,3rd.** Long-term outcome after exercising throughout pregnancy: fitness and cardiovascular risk. *American Journal of Obstetrics & Gynecology.* 2008. 199:489.e6 |
| **J. F. Clapp 3 and E. L. Capeless.** Neonatal morphometrics after endurance exercise during pregnancy. *American Journal of Obstetrics & Gynecology.* 1990. 163:1805-1811 |
| **J. F. Clapp 3 and E. L. Capeless.** The changing glycemic response to exercise during pregnancy. *American Journal of Obstetrics & Gynecology.* 1991. 165:1678-1683 |
| **J. F. Clapp 3 and K. H. Rizk.** Effect of recreational exercise on midtrimester placental growth. *American Journal of Obstetrics & Gynecology.* 1992. 167:1518-1521 |
| **J. F. Clapp 3 and S. Dickstein.** Endurance exercise and pregnancy outcome. *Medicine & Science in Sports & Exercise.* 1984. 16:556-562 |
| **J. F. Clapp 3, H. Kim, B. Burciu and B. Lopez.** Beginning regular exercise in early pregnancy: effect on fetoplacental growth. *American Journal of Obstetrics & Gynecology.* 2000. 183:1484-1488 |
| **J. F. Clapp 3, H. Kim, B. Burciu, S. Schmidt, K. Petry and B. Lopez.** Continuing regular exercise during pregnancy: effect of exercise volume on fetoplacental growth. *American Journal of Obstetrics & Gynecology.* 2002. 186:142-147 |
| **J. F. Clapp 3, K. D. Little and E. L. Capeless.** Fetal heart rate response to sustained recreational exercise. *American Journal of Obstetrics & Gynecology.* 1993. 168:198-206 |
| **J. F. Clapp 3, K. D. Little and J. A. Widness.** Effect of maternal exercise and fetoplacental growth rate on serum erythropoietin concentrations. *American Journal of Obstetrics & Gynecology.* 2003. 188:1021-1025 |
| **J. F. Clapp 3, K. D. Little, S. Appleby-Wineberg and J. A. Widness.** The effect of regular maternal exercise on erythropoietin in cord blood and amniotic fluid. *American Journal of Obstetrics & Gynecology.* 1995. 172:1445-1451 |
| **J. F. Clapp 3, S. Simonian, B. Lopez, S. Appleby-Wineberg and R. Harcar-Sevcik.** The one-year morphometric and neurodevelopmental outcome of the offspring of women who continued to exercise regularly throughout pregnancy. *American Journal of Obstetrics & Gynecology.* 1998. 178:594-599 |
| **J. F. Clapp 3, W. Stepanchak, J. Tomaselli, M. Kortan and S. Faneslow.** Portal vein blood flow-effects of pregnancy, gravity, and exercise. *American Journal of Obstetrics & Gynecology.* 2000. 183:167-172 |
| **J. F. Clapp 3.** Fetal heart rate response to running in midpregnancy and late pregnancy. *American Journal of Obstetrics & Gynecology.* 1985. 153:251-252 |
| **J. F. Clapp 3.** Morphometric and neurodevelopmental outcome at age five years of the offspring of women who continued to exercise regularly throughout pregnancy. *J.Pediatr.* 1996. 129:856-863 |
| **J. F. Clapp 3.** NIHMS91250 PMC2650435; Long-term outcome after exercising throughout pregnancy: fitness and cardiovascular risk. *American Journal of Obstetrics & Gynecology.* 2008. 199:489.e1-489.e6 |
| **J. F. Clapp 3.** Oxygen consumption during treadmill exercise before, during, and after pregnancy. *American Journal of Obstetrics & Gynecology.* 1989. 161:1458-1464 |
| **J. F. Clapp 3.** The changing thermal response to endurance exercise during pregnancy. *American Journal of Obstetrics & Gynecology.* 1991. 165:1684-1689 |
| **J. F. Clapp 3.** The course of labor after endurance exercise during pregnancy. *American Journal of Obstetrics & Gynecology.* 1990. 163:1799-1805 |
| **J. F. Clapp 3.** The effects of maternal exercise on early pregnancy outcome. *American Journal of Obstetrics & Gynecology.* 1989. 161:1453-1457 |
| **J. F. Clapp 3rd and E. Capeless.** The VO2max of recreational athletes before and after pregnancy. 1991. 23:1128-1133 |
| **J. F. Clapp 3rd and E. L. Capeless.** The changing glycemic response to exercise during pregnancy. 1991. 165:1678-1683 |
| **J. F. Clapp 3rd and K. H. Rizk.** Effect of recreational exercise on midtrimester placental growth. 1992. 167:1518-1521 |
| **J. F. Clapp 3rd and W. Kiess.** Effects of pregnancy and exercise on concentrations of the metabolic markers tumor necrosis factor alpha and leptin. 2000. 182:300-306 |
| **J. F. Clapp 3rd, K. D. Little and J. A. Widness.** Effect of maternal exercise and fetoplacental growth rate on serum erythropoietin concentrations. 2003. 188:1021-1025 |
| **J. F. Clapp 3rd, M. Wesley and R. H. Sleamaker.** Thermoregulatory and metabolic responses to jogging prior to and during pregnancy. 1987. 19:124-130 |
| **J. F. Clapp 3rd.** Effect of dietary carbohydrate on the glucose and insulin response to mixed caloric intake and exercise in both nonpregnant and pregnant women. 1998. 21 Suppl 2:B107-12 |
| **J. F. Clapp 3rd.** Long-term outcome after exercising throughout pregnancy: fitness and cardiovascular risk. 2008. 199:489.e1-489.e6 |
| **J. F. Clapp 3rd.** Maternal heart rate in pregnancy. 1985. 152:659-660 |
| **J. F. Clapp 3rd.** Morphometric and neurodevelopmental outcome at age five years of the offspring of women who continued to exercise regularly throughout pregnancy. 1996. 129:856-863 |
| **J. F. Clapp 3rd.** Oxygen consumption during treadmill exercise before, during, and after pregnancy. 1989. 161:1458-1464 |
| **J. F. Clapp 3rd.** The changing thermal response to endurance exercise during pregnancy. 1991. 165:1684-1689 |
| **J. F. Clapp 3rd.** The effects of maternal exercise on early pregnancy outcome. 1989. 161:1453-1457 |
| **J. F. Clapp and K. D. Little.** Effect of recreational exercise on pregnancy weight gain and subcutaneous fat deposition. *Med.Sci.Sports Exerc.* 1995. 27:170-177 |
| **J. F. Clapp Iii and B. Lopez.** Size at birth, obesity and blood pressure at age five. *Metabolic Syndrome & Related Disorders.* 2007. 5:116-126 |
| **J. F. Clapp, M. Wesley and R. H. Sleamaker.** Thermoregulatory and metabolic responses to jogging prior to and during pregnancy. / Reponses thermoregulatoires et metaboliques au jogging, avant et pendant la grossesse. *Medicine & Science in Sports & Exercise.* 1987. 19:124-130 |
| **J. G. Jelsma, K. M. van Leeuwen, N. Oostdam, et al.** PMC4738738; Beliefs, Barriers, and Preferences of European Overweight Women to Adopt a Healthier Lifestyle in Pregnancy to Minimize Risk of Developing Gestational Diabetes Mellitus: An Explorative Study. *Journal of Pregnancy.* 2016. 2016:3435791 |
| **J. G. Kemp, F. A. Greer and L. A. Wolfe.** Acid-base regulation after maximal exercise testing in late gestation. *J.Appl.Physiol.* 1997. 83:644-651 |
| **J. G. Kemp, F. A. Greer and L. A. Wolfe.** Acid-base regulation after maximal exercise testing in late gestation. 1997. 83:644-651 |
| **J. G. Logan and S. Yeo.** Effects of Stretching Exercise on Heart Rate Variability During Pregnancy. *J.Cardiovasc.Nurs.* 2016. 2:2 |
| **J. Gofin.** The effect on birth weight of employment during pregnancy. *J.Biosoc.Sci.* 1979. 11:259-267 |
| **J. Goy, L. Dodds, M. W. Rosenberg and W. D. King.** Health-risk behaviours: examining social disparities in the occurrence of stillbirth. 2008. 22:314-320 |
| **J. H. Kim, R. J. Roberge and J. B. Powell.** Effect of external airflow resistive load on postural and exercise-associated cardiovascular and pulmonary responses in pregnancy: a case control study. 2015. 15:45 |
| **J. H. Kim, R. J. Roberge and J. B. Powell.** PMC4357216; Effect of external airflow resistive load on postural and exercise-associated cardiovascular and pulmonary responses in pregnancy: a case control study. *BMC Pregnancy & Childbirth.* 2015. 15:45 |
| **J. H. Liu, E. J. Mayer-Davis, R. R. Pate, A. E. Gallagher and J. L. Bacon.** Physical activity during pregnancy is associated with reduced fasting insulin--the Pilot Pregnancy and Active Living Study. 2010. 23:1249-1252 |
| **J. H. Liu, E. Mayer-Davis, R. R. Pate, A. E. Gallagher and J. L. Bacon.** Physical activity during pregnancy is associated with reduced fasting insulin-the Pilot Pregnancy and Active Living Study. *Journal of Maternal-Fetal and Neonatal Medicine.* 2010. 23:1249-1252 |
| **J. H. Liu, S. N. Blair, Y. P. Teng, A. R. Ness, D. A. Lawlor and C. Riddoch.** Physical activity during pregnancy in a prospective cohort of British women: results from the Avon longitudinal study of parents and children. *Eur.J.Epidemiol.* 2011. 26:237-247 |
| **J. Huberty, D. Dinkel, M. W. Beets and J. Coleman.** Describing the use of the internet for health, physical activity, and nutrition information in pregnant women. 2013. 17:1363-1372 |
| **J. J. Newham, A. Wittkowski, J. Hurley, J. D. Aplin and M. Westwood.** Effects of antenatal yoga on maternal anxiety and depression: a randomized controlled trial. *Depress.Anxiety.* 2014. 31:631-640 |
| **J. J. Newham, A. Wittkowski, J. Hurley, J. D. Aplin and M. Westwood.** Effects of antenatal yoga on maternal anxiety and depression: a randomized controlled trial. 2014. 31:631-640 |
| **J. J. Newham, C. Allan, P. Leahy-Warren, D. Carrick-Sen and F. Alderdice.** Intentions Toward Physical Activity and Resting Behavior in Pregnant Women: Using the Theory of Planned Behavior Framework in a Cross-Sectional Study. *Birth.* 2016. 43:49-57 |
| **J. J. Pomerance, L. Gluck and V. A. Lynch.** Maternal exercise as a screening test for uteroplacental insufficiency. *Obstetrics & Gynecology.* 1974. 44:383-387 |
| **J. J. Pomerance, L. Gluck and V. A. Lynch.** Physical fitness in pregnancy: its effect on pregnancy outcome. *American Journal of Obstetrics & Gynecology.* 1974. 119:867-876 |
| **J. Jurewicz, W. Hanke, T. Makowiec-Dabrowska and J. Kalinka.** Heaviness of the work measured by energy expenditure during pregnancy and its effect on birth weight]. *Ginekol.Pol.* 2006. 77:537-542 |
| **J. L. Ersek and L. R. Brunner Huber.** Physical activity prior to and during pregnancy and risk of postpartum depressive symptoms. 2009. 38:556-566 |
| **J. L. Huberty, M. P. Buman, J. A. Leiferman, J. Bushar and M. A. Adams.** Trajectories of objectively-measured physical activity and sedentary time over the course of pregnancy in women self-identified as inactive. *Preventive Medicine Reports.* 2016. 3:353-360 |
| **J. L. Huberty, M. P. Buman, J. A. Leiferman, J. Bushar and M. A. Adams.** PMC4929212; Trajectories of objectively-measured physical activity and sedentary time over the course of pregnancy in women self-identified as inactive. *Preventive Medicine Reports.* 2016. 3:353-360 |
| **J. L. Kraschnewski, C. H. Chuang, D. S. Downs, et al.** Association of prenatal physical activity and gestational weight gain: results from the first baby study. 2013. 23:e233-8 |
| **J. L. Kraschnewski, C. H. Chuang, D. S. Downs, et al.** NIHMS494513 PMC3742311; Association of prenatal physical activity and gestational weight gain: results from the first baby study. *Womens Health Issues.* 2013. 23:e233-8 |
| **J. Langhoff-Roos, G. Lindmark, E. Kylberg and M. Gebre-Medhin.** Energy intake and physical activity during pregnancy in relation to maternal fat accretion and infant birthweight. *British Journal of Obstetrics & Gynaecology.* 1987. 94:1178-1185 |
| **J. Langhoff-Roos, G. Lindmark, E. Kylberg and M. Gebre-Medhin.** Energy intake and physical activity during pregnancy in relation to maternal fat accretion and infant birthweight. *Br.J.Obstet.Gynaecol.* 1987. 94:1178-1185 |
| **J. Leiferman, T. Swibas, K. Koiness, J. A. Marshall and A. L. Dunn.** My baby, my move: examination of perceived barriers and motivating factors related to antenatal physical activity. 2011. 56:33-40 |
| **J. Leng, G. Liu, C. Zhang, et al.** Physical activity, sedentary behaviors and risk of gestational diabetes mellitus: a population-based cross-sectional study in Tianjin, China. *European Journal of Endocrinology.* 2016. 174:763-773 |
| **J. Leng, G. Liu, C. Zhang, et al.** Physical activity, sedentary behaviors and risk of gestational diabetes mellitus: a population-based cross-sectional study in Tianjin, China. *European Journal of Endocrinology.* 2016. 174:763-773 |
| **J. Leng, G. Liu, C. Zhang, et al.** Physical activity, sedentary behaviors and risk of gestational diabetes mellitus: A population-based cross-sectional study in Tianjin, China. *European Journal of Endocrinology.* 2016. 174:763-773 |
| **J. Liu, J. N. Laditka, E. J. Mayer-Davis and R. R. Pate.** Does physical activity during pregnancy reduce the risk of gestational diabetes among previously inactive women?. 2008. 35:188-195 |
| **J. Liu, J. N. Laditka, E. Mayer-Davis and R. R. Pate.** Does physical activity during pregnancy reduce the risk of gestational diabetes among previously inactive women?. *Birth.* 2008. 35:188-195 |
| **J. Liu, J. N. Laditka, E. Mayer-Davis and R. R. Pate.** Physical activity during pregnancy may reduce risk of gestational diabetes among previously inactive women. *Diabetes.* 2006. 55:A418-A418 |
| **J. Liu, S. N. Blair, Y. Teng, A. R. Ness, D. A. Lawlor and C. Riddoch.** Physical activity during pregnancy in a prospective cohort of British women: results from the Avon longitudinal study of parents and children. 2011. 26:237-247 |
| **J. Lutter.** Fetal outcome of women who ran while pregnant: a preliminary report. *Melpomene Report.* 1984. 3:6-8 |
| **J. M. Catov, R. B. Ness, M. F. Wellons, D. R. Jacobs, J. M. Roberts and E. P. Gunderson.** Prepregnancy lipids related to preterm birth risk: the coronary artery risk development in young adults study. 2010. 95:3711-3718 |
| **J. M. DiNallo, D. S. Downs and G. Le Masurier.** Objectively assessing treadmill walking during the second and third pregnancy trimesters. *Journal of Physical Activity & Health.* 2012. 9:21-28 |
| **J. M. DiNallo, D. S. Downs and G. Le Masurier.** Objectively assessing treadmill walking during the second and third pregnancy trimesters. 2012. 9:21-28 |
| **J. M. DiNallo, G. C. Le Masurier, N. I. Williams and D. S. Downs.** Walking for health in pregnancy: assessment by indirect calorimetry and accelerometry. 2008. 79:28-35 |
| **J. M. Dodd, A. Newman, L. J. Moran, et al.** The effect of antenatal dietary and lifestyle advice for women who are overweight or obese on emotional well-being: the LIMIT randomized trial. *Acta Obstet.Gynecol.Scand.* 2016. 95:309-318 |
| **J. M. Dodd, A. R. Deussen, I. Mohamad, et al.** NIHMS777629 Available on 01/01/17] PMC4859433 Available on 01/01/17]; The effect of antenatal lifestyle advice for women who are overweight or obese on secondary measures of neonatal body composition: the LIMIT randomised trial. *BJOG: An International Journal of Obstetrics & Gynaecology.* 2016. 123:244-253 |
| **J. M. Dodd, C. Cramp, Z. Sui, et al.** The effects of antenatal dietary and lifestyle advice for women who are overweight or obese on maternal diet and physical activity: the LIMIT randomised trial. 2014. 12:161 |
| **J. M. Dodd, R. M. Grivell and J. A. Owens.** Antenatal Dietary and Lifestyle Interventions for Women Who are Overweight or Obese: Outcomes from the LIMIT Randomized Trial. 2014. 3:392-399 |
| **J. M. Kinder, T. T. Jiang, J. M. Ertelt, et al.** NIHMS707202 Available on 07/30/16] PMC4522363 Available on 07/30/16]; Cross-Generational Reproductive Fitness Enforced by Microchimeric Maternal Cells. *Cell.* 2015. 162:505-515 |
| **J. M. Nicklas, L. J. Miller, C. A. Zera, R. B. Davis, S. E. Levkoff and E. W. Seely.** Factors associated with depressive symptoms in the early postpartum period among women with recent gestational diabetes mellitus. 2013. 17:1665-1672 |
| **J. M. Pivarnik, A. D. Stein and J. M. Rivera.** Effect of pregnancy on heart rate/oxygen consumption calibration curves. *Medicine & Science in Sports & Exercise.* 2002. 34:750-755 6p |
| **J. M. Pivarnik, A. D. Stein and J. M. Rivera.** Effect of pregnancy on heart rate/oxygen consumption calibration curves. 2002. 34:750-755 |
| **J. M. Pivarnik, L. M. Mudd, E. E. White, R. A. Schlaff and K. L. Peyer.** Physical activity during pregnancy and offspring characteristics at 8-10 years. *Journal of Sports Medicine & Physical Fitness.* 2014. 54:672-679 |
| **J. M. Pivarnik, M. B. Mauer, N. A. Ayres, B. Kirshon, G. A. Dildy and D. B. Cotton.** Effects of chronic exercise on blood volume expansion and hematologic indices during pregnancy. *Obstetrics & Gynecology.* 1994. 83:265-269 |
| **J. M. Pivarnik, N. A. Ayres, M. B. Mauer, D. B. Cotton, B. Kirshon and G. A. Dildy.** Effects of maternal aerobic fitness on cardiorespiratory responses to exercise. / Effets de la condition aerobie maternelle sur les reponses cardiorespiratoires a l ' exercice. *Medicine & Science in Sports & Exercise.* 1993. 25:993-998 |
| **J. M. Pivarnik, N. A. Ayres, M. B. Mauer, D. B. Cotton, B. Kirshon and G. A. Dildy.** Effects of maternal aerobic fitness on cardiorespiratory responses to exercise. 1993. 25:993-998 |
| **J. M. Pivarnik, W. Lee and J. F. Miller.** Physiological and perceptual responses to cycle and treadmill exercise during pregnancy. 1991. 23:470-475 |
| **J. M. Pivarnik, W. Lee, J. F. Miller and J. Werch.** Alterations in plasma volume and protein during cycle exercise throughout pregnancy. 1990. 22:751-755 |
| **J. M. Pivarnik, W. Lee, S. L. Clark, D. B. Cotton, H. T. Spillman and J. F. Miller.** Cardiac output responses of primigravid women during exercise determined by the direct Fick technique. *Obstetrics & Gynecology.* 1990. 75:954-959 |
| **J. M. Pivarnik, W. Lee, S. L. Clark, D. B. Cotton, H. T. Spillman and J. F. Miller.** Cardiac output responses of primigravid women during exercise determined by the direct Fick technique. 1990. 75:954-959 |
| **J. M. Pivarnik, W. Lee, T. Spillman, S. L. Clark, D. B. Cotton and J. F. Miller.** Maternal respiration and blood-gases during aerobic exercise performed at moderate altitude. *Med.Sci.Sports Exerc.* 1992. 24:868-872 |
| **J. M. Pivarnik, W. Lee, T. Spillman, S. L. Clark, D. B. Cotton and J. F. Miller.** Maternal respiration and blood gases during aerobic exercise performed at moderate altitude. 1992. 24:868-872 |
| **J. M. Schlütter, I. Kirkegaard, A. S. Ferreira, et al.** The Number of Endovascular Trophoblasts in Maternal Blood Increases Overnight and after Physical Activity: An Experimental Study. *Fetal.Diagn.Ther.* 2015. |
| **J. M. Schlutter, I. Kirkegaard, L. Hatt, B. Christensen, S. Kolvraa and N. Uldbjerg.** The number of fetal cells in maternal blood increases overnight and after exercise. *Prenat.Diagn.* 2012. 32:23 |
| **J. M. Schlutter, L. Hatt, C. Bach, I. Kirkegaard, S. Kolvraa and N. Uldbjerg.** The cell-free fetal DNA fraction in maternal blood decreases after physical activity. *Prenat.Diagn.* 2014. 34:341-344 |
| **J. M. Walsh, C. McGowan, J. Byrne and F. M. McAuliffe.** Prevalence of physical activity among healthy pregnant women in Ireland. 2011. 114:154-155 |
| **J. M. Wright, C. S. Hoffman, M. J. Nieuwenhuijsen and D. A. Savitz.** The Effect of Swimming During Pregnancy on Fetal Growth. *Water Quality Exposure and Health.* 2011. 3:217-223 |
| **J. Makela, H. Lagstrom, A. Kaljonen, O. Simell and H. Niinikoski.** Hyperglycemia and lower diet quality in pregnant overweight women and increased infant size at birth and at 13 months of age--STEPS study. 2013. 89:439-444 |
| **J. Marcinkevage, A. Correa, U. Ramakrishnan, A. Sharma, K. M. V. Narayan and G. Umpierrez.** Physical activity behaviors and blood glucose levels during first trimester of pregnancy in Urban black women. *Diabetes.* 2012. 61:A636-A637 |
| **J. Marcinkevage, A. Correa, U. Ramakrishnan, A. Sharma, K. M. Venkat Narayan and G. Umpierrez.** Reducing sedentary behavior and increasing physical activity during pregnancy: A feasibility study. *Diabetes.* 2012. 61:A344 |
| **J. N. Olayiwola, O. C. Irizarry, K. O'Connell and S. Milan.** Living Smart, Living Fit: a patient-centered program to improve perinatal outcomes in a community health center population. 2013. 4:31-35 |
| **J. N. Watts, Y. D. Miller and A. L. Marshall.** Depressive symptoms during pregnancy: Exploring the role of sitting. 2013. 6:36-42 |
| **J. Newham, J. Hurley, A. Wittkowski, J. D. Aplin and M. Westwood.** Initials findings of CALMA study (Can Antenatal Yoga Lower Maternal Anxiety). *Journal of Reproductive and Infant Psychology.* 2011. 29 (3):e29-e30 |
| **J. Newham, M. Westwood, A. Wittkowski and J. Aplin.** Efficacy of yoga in reducing maternal anxiety in pregnancy. *Journal of Reproductive and Infant Psychology.* 2010. 28 (3):e13 |
| **J. Orskou, T. B. Henriksen, U. Kesmodel and N. J. Secher.** Maternal characteristics and lifestyle factors and the risk of delivering high birth weight infants. *Obstetrics & Gynecology.* 2003. 102:115-120 |
| **J. Orskou, T. B. Henriksen, U. Kesmodel and N. J. Secher.** Maternal characteristics and lifestyle factors and the risk of delivering high birth weight infants. 2003. 102:115-120 |
| **J. P. Manshande, R. Eeckels, V. Manshande-Desmet and R. Vlietinck.** Rest versus heavy work during the last weeks of pregnancy: influence on fetal growth. *British Journal of Obstetrics & Gynaecology.* 1987. 94:1059-1067 |
| **J. P. Manshande, R. Eeckels, V. Manshande-Desmet and R. Vlietinck.** Rest versus heavy work during the last weeks of pregnancy: influence on fetal growth. 1987. 94:1059-1067 |
| **J. P. Pirhonen, P. G. Lindqvist and K. Marsal.** A longitudinal study of maternal oxygen saturation during short-term submaximal exercise. *Clinical Physiology & Functional Imaging.* 2003. 23:37-41 |
| **J. P. Pirhonen, P. G. Lindqvist and K. Marsal.** A longitudinal study of maternal oxygen saturation during short-term submaximal exercise. 2003. 23:37-41 |
| **J. Parizkova and R. Petrasek.** The impact of daily work load during pregnancy on lipid metabolism in the liver of the offspring. *Bibl.Nutr.Dieta.* 1979. 57-64 |
| **J. Pomeroy, F. Renstrom, A. M. Gradmark, et al.** Maternal physical activity and insulin action in pregnancy and their relationships with infant body composition. 2013. 36:267-269 |
| **J. R. Ruiz, M. Perales, M. Pelaez, C. Lopez, A. Lucia and R. Barakat.** Supervised exercise-based intervention to prevent excessive gestational weight gain: A randomized controlled trial. *Mayo Clin.Proc.* 2013. 88:1388-1397 |
| **J. S. Arfi and G. Peres.** Maternal and fetal heart rates during bicycle ergometer exercise]. *J.Gynecol.Obstet.Biol.Reprod.* 1986. 15:281-286 |
| **J. S. Haas, E. Fuentes-Afflick, A. L. Stewart, et al.** Prepregnancy health status and the risk of preterm delivery. 2005. 159:58-63 |
| **J. S. Savage, D. S. Downs, Y. Dong and D. E. Rivera.** PMC4056194; Control systems engineering for optimizing a prenatal weight gain intervention to regulate infant birth weight. *Am.J.Public Health.* 2014. 104:1247-1254 |
| **J. S. Tavares, A. S. O. Melo, M. M. R. Amorim, et al.** Physical activity patterns in pregnant women attending the family health program of Campina Grande - PB. *Revista Brasileira de Epidemiologia.* 2009. 12:10-19 |
| **J. Smedley, J. M. Jancey, S. Dhaliwal, Y. Zhao, S. M. D. R. Monteiro and P. Howat.** Women's reported health behaviours before and during pregnancy: A retrospective study. 2014. 73:28-40 |
| **J. T. Bambicini, V. C. M. Soares, M. R. D. Zanetti, M. R. Torloni, M. C. Ribeiro and R. Mattar.** Effects of aerobic and resistance exercises on glycemic levels of patients with gestational diabetes: Pilot study. *International Journal of Gynecology and Obstetrics.* 2012. 119:S603 |
| **J. Tinloy, C. H. Chuang, J. Zhu, J. Pauli, J. L. Kraschnewski and K. H. Kjerulff.** NIHMS541362 Available on 01/01/15] PMC3913372 Available on 01/01/15]; Exercise during pregnancy and risk of late preterm birth, cesarean delivery, and hospitalizations. *Womens Health Issues.* 2014. 24:e99-e104 |
| **J. Van Eyck, J. Wladimiroff, M. Noordam, H. Tonge and H. Prechtl.** The blood flow velocity waveform in the fetal descending aorta: Its relationship to fetal behavioural states in normal pregnancy at 37-38 weeks. *Early Hum.Dev.* 1985. 12:137-143 |
| **J. W. Van Hook, P. Gill, T. R. Easterling, B. Schmucker, K. Carlson and T. J. Benedetti.** The hemodynamic effects of isometric exercise during late normal pregnancy. 1993. 169:870-873 |
| **J. W. Vanhook, P. Gill, T. R. Easterling, B. Schmucker, K. Carlson and T. J. Benedetti.** THE HEMODYNAMIC-EFFECTS OF ISOMETRIC-EXERCISE DURING LATE NORMAL-PREGNANCY. 1993. 169:870-873 |
| **J. Zhang and D. A. Savitz.** Exercise during pregnancy among US women. *Ann.Epidemiol.* 1996. 6:53-59 |
| **J. Zhang and D. A. Savitz.** Exercise during pregnancy among US women. 1996. 6:53-59 |
| **James J. Newham, Carly Allan, Patricia Leahy-Warren, Debbie Carrick-Sen and Fiona Alderdice.** Intentions toward physical activity and resting behavior in pregnant women: Using the theory of planned behavior framework in a cross-sectional study. *Birth: Issues in Perinatal Care.* 2016. 43:49-57 |
| **Jan Pryor.** Physical and behavioural correlates of 12-month development in small-for-gestational age and appropriately grown infants. 1996. 14:233-242 |
| **Janet Baker.** Developing a care pathway for obese women in pregnancy and beyond. 2011. 19:632-643 12 |
| **Jennifer Guida, Swathy Sundaram and Jenn Leiferman.** Antenatal physical activity: Investigating the effects on postpartum depression. 2012. 4:1276-1286 11 |
| **Jennifer Jones, Jeff Housman and Willis McAleese.** Exercise, nutrition, and weight management during pregnancy. 2010. 25:120-128 |
| **Jihong Liu, Sara Wilcox, Kara Whitaker, Christine Blake and Cheryl Addy.** Preventing excessive weight gain during pregnancy and promoting postpartum weight loss: A pilot lifestyle intervention for overweight and obese African American women. 2015. 19:840-849 |
| **Joellen W. Hawkins, Cynthia S. Aber, Alice Cannan, Christine M. Coppinger and Kathleen O'Brien Rafferty.** Women's reported self-care behaviors during pregnancy. 1998. 19:529-538 |
| **Jonathan Y. Huang, Dodie Arnold, Chun-fang Qiu, Raymond S. Miller, Michelle A. Williams and Daniel A. Enquobahrie.** Association of Serum Vitamin D with Symptoms of Depression and Anxiety in Early Pregnancy. 2014. 23:588-595 8 |
| **Jovita A. Daniel, K. Venkateswarlu and Clifford C. Ezeugwu.** Effect of Aerobic Dance Exercise on Blood Pressure of Normotensive Pregnant Women Diagnosed with Gestational Diabetes at Federal Medical Centre, Owerri, South East Nigeria. *Indian Journal of Physiotherapy & Occupational Therapy.* 2015. 9:124-128 |
| **Juan Dertkigil San, J. G. Cecatti, M. A. Sarno, S. R. Cavalcante and E. F. Marussi.** Variation in the amniotic fluid index following moderate physical activity in water during pregnancy. *Acta Obstet.Gynecol.Scand.* 2007. 86:547-552 |
| **K. A. Cooper, M. E. O'Neill, S. N. Hunyor and E. S. Boyce.** Hemodynamic responses of trained and sedentary pregnant women to semi-supine cycling. *Journal of Sports Medicine & Physical Fitness.* 1993. 33:203-204 |
| **K. A. Cooper, S. N. Hunyor, E. S. Boyce, M. E. O'Neill and D. B. Frewin.** Fetal heart rate and maternal cardiovascular and catecholamine responses to dynamic exercise. *Aust.N.Z.J.Obstet.Gynaecol.* 1987. 27:220-223 |
| **K. A. Matthews and J. Rodin.** Pregnancy alters blood pressure responses to psychological and physical challenge. *Psychophysiology.* 1992. 29:232-240 |
| **K. A. Matthews and J. Rodin.** Pregnancy alters blood pressure responses to psychological and physical challenge. 1992. 29:232-240 |
| **K. A. Salvesen and S. Morkved.** Randomised controlled trial of pelvic floor muscle training during pregnancy. *Br.Med.J.* 2004. 329:378-380 |
| **K. A. Salvesen, S. N. Stafne, T. M. Eggebo and S. Morkved.** Does regular exercise in pregnancy influence duration of labor? A secondary analysis of a randomized controlled trial. *Acta Obstet.Gynecol.Scand.* 2014. 93:73-79 |
| **K. A. Sauder, A. P. Starling, A. L. Shapiro, et al.** NIHMS788628 Available on 05/01/17] PMC4883104 Available on 05/01/17]; Diet, physical activity and mental health status are associated with dysglycaemia in pregnancy: the Healthy Start Study. *Diabetic Med.* 2016. 33:663-667 |
| **K. A. Webb, L. A. Wolfe and M. J. McGrath.** Effects of acute and chronic maternal exercise on fetal heart rate. *J.Appl.Physiol.* 1994. 77:2207-2213 |
| **K. B. Lesser, P. A. Gruppuso, R. B. Terry and M. W. Carpenter.** Exercise fails to improve postprandial glycemic excursion in women with gestational diabetes. *J.Matern.Fetal.* 1996. 5:211-217 |
| **K. B. Lesser, P. A. Gruppuso, R. B. Terry and M. W. Carpenter.** Exercise fails to improve postprandial glycemic excursion in women with gestational diabetes. 1996. 5:211-217 |
| **K. Baptiste-Roberts, P. Ghosh and W. K. Nicholson.** PMC3236988; Pregravid physical activity, dietary intake, and glucose intolerance during pregnancy. *Journal of Women's Health.* 2011. 20:1847-1851 |
| **K. Baptiste-Roberts, P. Ghosh and W. K. Nicholson.** Pregravid physical activity, dietary intake, and glucose intolerance during pregnancy. 2011. 20:1847-1851 |
| **K. Bo and L. A. Haakstad.** Is pelvic floor muscle training effective when taught in a general fitness class in pregnancy? A randomised controlled trial. 2011. 97:190-195 |
| **K. Bo, C. Fleten and W. Nystad.** Effect of antenatal pelvic floor muscle training on labor and birth. 2009. 113:1279-1284 |
| **K. Bo, G. Hilde, J. Staer-Jensen, F. Siafarikas, M. K. Tennfjord and M. E. Engh.** Does general exercise training before and during pregnancy influence the pelvic floor "opening" and delivery outcome? A 3D/4D ultrasound study following nulliparous pregnant women from mid-pregnancy to childbirth. *Br.J.Sports Med.* 2015. 49:196-199 |
| **K. Bø, L. A. H. Haakstad and N. Volder.** Do pregnant women exercise their pelvic floor muscles?. 2007. 18:733-736 |
| **K. Borodulin, K. R. Evenson and A. H. Herring.** Physical activity patterns during pregnancy through postpartum. 2009. 9:32 |
| **K. Borodulin, K. R. Evenson and A. H. Herring.** PMC2784751; Physical activity patterns during pregnancy through postpartum. *BMC Womens Health.* 2009. 9:32 |
| **K. Borodulin, K. R. Evenson, K. Monda, F. Wen, A. H. Herring and N. Dole.** Physical activity and sleep among pregnant women. 2010. 24:45-52 |
| **K. Broekhuizen, E. Althuizen, M. N. van Poppel, M. Donker and W. van Mechelen.** From theory to practice: intervention fidelity in a randomized controlled trial aiming to optimize weight development during pregnancy. 2012. 13:816-825 |
| **K. C. Vollebregt, H. Wolf, K. Boer, van der Wal, M. F., T. G. Vrijkotte and G. J. Bonsel.** Does physical activity in leisure time early in pregnancy reduce the incidence of preeclampsia or gestational hypertension?. 2010. 89:261-267 |
| **K. Davis, S. H. Goodman, J. Leiferman, M. Taylor and S. Dimidjian.** A randomized controlled trial of yoga for pregnant women with symptoms of depression and anxiety. 2015. 21:166-172 |
| **K. Davis, S. H. Goodman, J. Leiferman, M. Taylor and S. Dimidjian.** A randomized controlled trial of yoga for pregnant women with symptoms of depression and anxiety. *Complementary therapies in clinical practice.* 2015. 21:166-172 |
| **K. E. Brett, Z. M. Ferraro, M. Holcik and K. B. Adamo.** Prenatal physical activity and diet composition affect the expression of nutrient transporters and mTOR signaling molecules in the human placenta. *Placenta.* 2015. 36:204-212 |
| **K. E. Joung, K. H. Park, A. Filippaios, F. Dincer, H. Christou and C. S. Mantzoros.** Cord blood irisin levels are positively correlated with birth weight in newborn infants. *Metabolism: Clinical and Experimental.* 2015. 64:1507-1514 |
| **K. E. Lynch, J. R. Landsbaugh, B. W. Whitcomb, P. Pekow, G. Markenson and L. Chasan-Taber.** Physical Activity of Pregnant Hispanic Women. *Am.J.Prev.Med.* 2012. 43:434-439 |
| **K. E. Lynch, J. R. Landsbaugh, B. W. Whitcomb, P. Pekow, G. Markenson and L. Chasan-Taber.** Physical activity of pregnant Hispanic women. 2012. 43:434-439 |
| **K. E. Sørensen and K. G. Børlum.** Fetal heart function in response to short-term maternal exercise. *Br.J.Obstet.Gynaecol.* 1986. 93:310-313 |
| **K. Eliasson, I. Nordlander, B. Larson, M. Hammarstrom and E. Mattsson.** Influence of physical activity on urinary leakage in primiparous women. 2005. 15:87-94 |
| **K. Eliasson, I. Nordlander, E. Mattsson, B. Larson and M. Hammarstrom.** Prevalence of urinary leakage in nulliparous women with respect to physical activity and micturition habits. 2004. 15:149-153 |
| **K. F. Koltyn.** Mood changes in pregnant women following an exercise session and a prenatal information session. 1994. 4:191-195 |
| **K. F. Putnam, L. A. Mueller, E. F. Magann, et al.** Evaluating effects of self-reported domestic physical activity on pregnancy and neonatal outcomes in "stay at home" military wives. *Mil.Med.* 2013. 178:893-898 |
| **K. Fieril, A. Glantz and M. Fagevik Olsen.** Hemodynamic responses to single sessions of aerobic exercise and resistance exercise in pregnancy. *Acta Obstet.Gynecol.Scand.* 2016. 21:21 |
| **K. Godfrey, K. Walker-Bone, S. Robinson, et al.** Neonatal bone mass: influence of parental birthweight, maternal smoking, body composition, and activity during pregnancy. *Journal of Bone & Mineral Research.* 2001. 16:1694-1703 |
| **K. H. Paul, M. L. Graham and C. M. Olson.** The web of risk factors for excessive gestational weight gain in low income women. 2013. 17:344-351 |
| **K. Haby, A. Glantz, R. Hanas and A. Premberg.** Mighty Mums - An antenatal health care intervention can reduce gestational weight gain in women with obesity. 2015. 31:685-692 |
| **K. Ihrman.** A clinical and physiological study of pregnancy in a material from northern Sweden. VIII. The effect of physical training during pregnancy on the circulatory adjustment. *Acta Soc.Med.Ups.* 1960. 65:335-347 |
| **K. J. Guelfi and R. E. Halse.** Moderate-intensity exercise affects perceived hunger and fullness but not appetite-related hormones in late pregnancy. 2013. 38:1162-1165 |
| **K. J. Guelfi, C. Wang, J. A. Dimmock, B. Jackson, J. P. Newnham and H. Yang.** PMC4689036; A comparison of beliefs about exercise during pregnancy between Chinese and Australian pregnant women. *BMC Pregnancy & Childbirth.* 2015. 15:345 |
| **K. J. Guelfi, M. J. Ong, P. A. Fournier, et al.** Does supervised home-based exercise during pregnancy reduce the recurrence of gestational diabetes? A randomised controlled trial. *J.Paediatr.Child Health.* 2015. 51:35 |
| **K. K. Garnaes, S. Morkved, O. Salvesen and T. Moholdt.** Exercise Training and Weight Gain in Obese Pregnant Women: A Randomized Controlled Trial (ETIP Trial). *PLoS Medicine / Public Library of Science.* 2016. 13:e1002079 |
| **K. Kumareswaran, D. Elleri, J. M. Allen, et al.** Accuracy of continuous glucose monitoring during exercise in type 1 diabetes pregnancy. 2013. 15:223-229 |
| **K. Kumareswaran, D. Elleri, J. M. Allen, et al.** Physical activity energy expenditure and glucose control in pregnant women with type 1 diabetes: is 30 minutes of daily exercise enough?. 2013. 36:1095-1101 |
| **K. L. Kong, C. Campbell, K. Wagner, A. Peterson and L. Lanningham-Foster.** Impact of a walking intervention during pregnancy on post-partum weight retention and infant anthropometric outcomes. *Journal of developmental origins of health and disease.* 2014. 5:259-267 |
| **K. L. Kong, C. G. Campbell, R. C. Foster, A. D. Peterson and L. Lanningham-Foster.** A pilot walking program promotes moderate-intensity physical activity during pregnancy. *Medicine & Science in Sports & Exercise.* 2014. 46:462-471 |
| **K. L. Kong, M. W. Gillman, S. Rifas-Shiman and X. Wen.** Leisure time physical activity before and during mid-pregnancy and offspring adiposity in mid-childhood. *Pediatric Obesity.* 2015. |
| **K. L. Kong, M. W. Gillman, S. Rifas-Shiman and X. Wen.** NIHMS744771 PMC4695314; Leisure time physical activity before and during mid-pregnancy and offspring adiposity in mid-childhood. *Pediatric Obesity.* 2016. 11:81-87 |
| **K. L. Lindsay, C. Heneghan, B. McNulty, L. Brennan and F. M. McAuliffe.** Lifestyle and dietary habits of an obese pregnant cohort. 2015. 19:25-32 |
| **K. L. Lindsay, C. Heneghan, C. A. McGowan, L. Brennan and F. M. McAuliffe.** Lifestyle habits in obese pregnancy: A case-control study. *Archives of Disease in Childhood: Fetal and Neonatal Edition.* 2013. 98: |
| **K. Lagana.** Come bien, camina y no se preocupe--eat right, walk, and do not worry: selective biculturalism during pregnancy in a Mexican American community. 2003. 14:117-124 |
| **K. M. Borodulin, K. R. Evenson, F. Wen, A. H. Herring and A. M. Benson.** NIHMS366602 PMC3319731; Physical activity patterns during pregnancy. *Medicine & Science in Sports & Exercise.* 2008. 40:1901-1908 |
| **K. M. Borodulin, K. R. Evenson, F. Wen, A. H. Herring and A. M. Benson.** Physical activity patterns during pregnancy. 2008. 40:1901-1908 |
| **K. M. Gustafson, L. E. May, H. W. Yeh, S. K. Million and J. J. Allen.** NIHMS474547 PMC3753784; Fetal cardiac autonomic control during breathing and non-breathing epochs: the effect of maternal exercise. *Early Hum.Dev.* 2012. 88:539-546 |
| **K. M. Owe, E. K. Bjelland, B. Stuge, N. Orsini, M. Eberhard-Gran and S. Vangen.** Exercise level before pregnancy and engaging in high-impact sports reduce the risk of pelvic girdle pain: a population-based cohort study of 39 184 women. *Br.J.Sports Med.* 2016. 50:817-822 |
| **K. M. Owe, W. Nystad and K. B.** Correlates of regular exercise during pregnancy: the Norwegian Mother and Child Cohort Study. *Scand.J.Med.Sci.Sports.* 2009. 19:637-645 |
| **K. M. Owe, W. Nystad and K. Bo.** Association between regular exercise and excessive newborn birth weight. *Obstetrics & Gynecology.* 2009. 114:770-776 |
| **K. M. Owe, W. Nystad and K. Bø.** Correlates of regular exercise during pregnancy: The Norwegian Mother and Child Cohort Study. 2009. 19:637-645 |
| **K. M. Owe, W. Nystad, R. Skjaerven, H. Stigum and K. Bo.** Exercise during pregnancy and the gestational age distribution: a cohort study. *Medicine & Science in Sports & Exercise.* 2012. 44:1067-1074 |
| **K. M. Smith and C. G. Campbell.** Physical activity during pregnancy: impact of applying different physical activity guidelines. 2013. 2013:165617 |
| **K. M. Smith, R. C. Foster and C. G. Campbell.** PMC3221627; Accuracy of physical activity assessment during pregnancy: an observational study. *BMC Pregnancy & Childbirth.* 2011. 11:86 |
| **K. M. Songoygard, S. N. Stafne, K. A. Evensen, K. A. Salvesen, T. Vik and S. Morkved.** Does exercise during pregnancy prevent postnatal depression? A randomized controlled trial. 2012. 91:62-67 |
| **K. Marsal, G. Gennser and O. Lofgren.** Effects on fetal breathing movements of maternal challenges. Cross-over study on dynamic work, static work, passive movements, hyperventilation and hyperoxygenation. *Acta Obstet.Gynecol.Scand.* 1979. 58:335-342 |
| **K. Marsal, O. Lofgren and G. Gennser.** Fetal breathing movements and maternal exercise. *Acta Obstet.Gynecol.Scand.* 1979. 58:197-201 |
| **K. Mattran, L. M. Mudd, R. A. Rudey and J. S. Kelly.** Leisure-time physical activity during pregnancy and offspring size at 18 to 24 months. *Journal of Physical Activity & Health.* 2011. 8:655-662 |
| **K. Melzer, Y. Schutz, M. Boulvain and B. Kayser.** Pregnancy-related changes in activity energy expenditure and resting metabolic rate in Switzerland. *Eur.J.Clin.Nutr.* 2009. 63:1185-1191 |
| **K. Melzer, Y. Schutz, N. Soehnchen, et al.** Effects of recommended levels of physical activity on pregnancy outcomes. *American Journal of Obstetrics & Gynecology.* 2010. 202:266.e1-266.e6 |
| **K. Morkrid, A. K. Jenum, S. Berntsen, et al.** Objectively recorded physical activity and the association with gestational diabetes. 2014. 24:e389-97 |
| **K. N. Mitchell and B. S. Macneill.** The aerobic capacity of pregnant-women during nonweight-bearing versus weight-bearing exercise. 1988. 68:860-860 |
| **K. Nelson, V. Lohsoonthorn and M. A. Williams.** Preterm delivery risk in relation to maternal occupational and leisure time physical activity among thai women. *Asian Biomedicine.* 2009. 3:267-277 |
| **K. P. Fieril, M. F. Olsén, A. Glantz and M. Larsson.** Experiences of exercise during pregnancy among women who perform regular resistance training: A qualitative study. *Phys.Ther.* 2014. 94:1135-1143 |
| **K. Phan, P. Bidulka, Y. H. Gomez, et al.** Effect of Acute Weight Gain and Physical Activity on Arterial Stiffness in Pregnant Women at High Risk for Hypertensive Disorders of Pregnancy. *Can.J.Cardiol.* 2016. 32:S5 |
| **K. Piravej and R. Saksirinukul.** Survey of patterns, attitudes, and the general effects of exercise during pregnancy in 203 Thai pregnant women at King Chulalongkorn Memorial Hospital. *Journal of the Medical Association of Thailand.* 2001. 84 Suppl 1:S276-82 |
| **K. Polanska, P. Muszynski, W. Sobala, E. Dziewirska, D. Merecz-Kot and W. Hanke.** Maternal lifestyle during pregnancy and child psychomotor development - Polish Mother and Child Cohort study. *Early Hum.Dev.* 2015. 91:317-325 |
| **K. Przybylowicz, M. Przybylowicz, M. Grzybiak and K. Janiszewska.** Effects of physical activity during pregnancy and gestational weight gain on newborn weight and length at birth in Warminsko-Mazurskie province. *Acta Scientiarum Polonorum Technologia Alimentaria.* 2014. 13:203-211 |
| **K. R. Evenson and F. Wen.** National trends in self-reported physical activity and sedentary behaviors among pregnant women: NHANES 1999-2006. *Prev.Med.* 2010. 50:123-128 |
| **K. R. Evenson and F. Wen.** National trends in self-reported physical activity and sedentary behaviors among pregnant women: NHANES 1999-2006. 2010. 50:123-128 |
| **K. R. Evenson and F. Wen.** Prevalence and correlates of objectively measured physical activity and sedentary behavior among US pregnant women. *Prev.Med.* 2011. 53:39-43 |
| **K. R. Evenson and F. Wen.** Prevalence and correlates of objectively measured physical activity and sedentary behavior among US pregnant women. 2011. 53:39-43 |
| **K. R. Evenson, A. Siega-Riz, D. A. Savitz, J. A. Leiferman and J. M. Thorp J.** Vigorous leisure activity and pregnancy outcome. *Epidemiology.* 2002. 13:653-659 |
| **K. R. Evenson, A. Siega-Riz, D. A. Savitz, J. A. Leiferman and J. M. Thorp Jr.** Vigorous leisure activity and pregnancy outcome. *Epidemiology.* 2002. 13:653-659 |
| **K. R. Evenson, D. A. Savitz and S. L. Huston.** Leisure-time physical activity among pregnant women in the US. 2004. 18:400-407 |
| **K. R. Heineman, S. La Bastide-Van Gemert, V. Fidler, K. J. Middelburg, A. F. Bos and M. Hadders-Algra.** Construct validity of the Infant Motor Profile: relation with prenatal, perinatal, and neonatal risk factors. 2010. 52:e209-15 |
| **K. R. Kardel, B. Johansen, N. Voldner, P. O. Iversen and T. Henriksen.** Association between aerobic fitness in late pregnancy and duration of labor in nulliparous women. *Acta Obstet.Gynecol.Scand.* 2009. 88:948-952 |
| **K. R. Kardel.** Effects of intense training during and after pregnancy in top-level athletes. *Scand.J.Med.Sci.Sports.* 2005. 15:79-86 |
| **K. R. Richardsen, I. Mdala, S. Berntsen, et al.** PMC4936091; Objectively recorded physical activity in pregnancy and postpartum in a multi-ethnic cohort: association with access to recreational areas in the neighbourhood. *International Journal of Behavioral Nutrition & Physical Activity.* 2016. 13:78 |
| **K. R. Richardsen, R. S. Falk, A. K. Jenum, et al.** PMC4962490; Predicting who fails to meet the physical activity guideline in pregnancy: a prospective study of objectively recorded physical activity in a population-based multi-ethnic cohort. *BMC Pregnancy & Childbirth.* 2016. 16:186 |
| **K. Rauh, E. Gabriel, E. Kerschbaum, et al.** PMC3718707; Safety and efficacy of a lifestyle intervention for pregnant women to prevent excessive maternal weight gain: a cluster-randomized controlled trial. *BMC Pregnancy & Childbirth.* 2013. 13:151 |
| **K. Rauh, J. Gunther, J. Kunath, L. Stecher and H. Hauner.** PMC4608142; Lifestyle intervention to prevent excessive maternal weight gain: mother and infant follow-up at 12 months postpartum. *BMC Pregnancy & Childbirth.* 2015. 15:265 |
| **K. Renault, K. Norgaard, K. R. Andreasen, N. J. Secher and L. Nilas.** Physical activity during pregnancy in obese and normal-weight women as assessed by pedometer. *Acta Obstet.Gynecol.Scand.* 2010. 89:956-961 |
| **K. Renault, K. Norgaard, K. R. Andreasen, N. J. Secher and L. Nilas.** Physical activity during pregnancy in obese and normal-weight women as assessed by pedometer. 2010. 89:956-961 |
| **K. Renault, K. Norgaard, K. R. Andreasen, N. J. Secher and L. Nilas.** Physical activity during pregnancy in obese and normal-weight women as assessed by pedometer. *Acta Obstet.Gynecol.Scand.* 2010. 89:956-961 |
| **K. Renault, K. Norgaard, N. J. Secher, K. R. Andreasen, B. Baldur-Felskov and L. Nilas.** Physical activity during pregnancy in normal-weight and obese women: compliance using pedometer assessment. *Journal of Obstetrics & Gynaecology.* 2012. 32:430-433 |
| **K. Renault, K. Norgaard, N. J. Secher, K. R. Andreasen, B. Baldur-Felskov and L. Nilas.** Physical activity during pregnancy in normal-weight and obese women: compliance using pedometer assessment. 2012. 32:430-433 |
| **K. S. Haugland, S. Rasmussen and A. K. Daltveit.** Group intervention for women with pelvic girdle pain in pregnancy. A randomized controlled trial. 2006. 85:1320-1326 |
| **K. Sjogren Forss, E. Ekvall Hansson, M. Troein and L. Stjernberg.** Patterns of physical activity among women and men before and during pregnancy. 2014. 128:814-816 |
| **K. Smith, L. Lanningham-Foster, A. Welch and C. Campbell.** Web-Based Behavioral Intervention Increases Maternal Exercise but Does Not Prevent Excessive Gestational Weight Gain in Previously Sedentary Women. *Journal of Physical Activity & Health.* 2016. 13:587-593 |
| **K. Soiva, A. Salmi, M. Groenroos and T. Peltonen.** Physical Working Capacity during Pregnancy and Effect of Physical Work Tests on Foetal Heart Rate. *Ann.Chir.Gynaecol.Fenn.* 1964. 53:187-196 |
| **K. T. Kasawara, C. S. Burgos, S. L. do Nascimento, N. O. Ferreira, F. G. Surita and E. S. Pinto.** PMC3753734; Maternal and Perinatal Outcomes of Exercise in Pregnant Women with Chronic Hypertension and/or Previous Preeclampsia: A Randomized Controlled Trial. *ISRN Obstetrics & Gynecology.* 2013. 2013:857047 |
| **K. Ueland, M. J. Novy and J. Metcalfe.** Cardiorespiratory responses to pregnancy and exercise in normal women and patients with heart disease. *American Journal of Obstetrics & Gynecology.* 1973. 115:4-10 |
| **K. Ueland, M. J. Novy and J. Metcalfe.** Cardiorespiratory responses to pregnancy and exercise in normal women and patients with heart disease. 1973. 115:4-10 |
| **K. Ueland, M. J. Novy, E. N. Peterson and J. Metcalfe.** Maternal cardiovascular dynamics. IV. The influence of gestational age on the maternal cardiovascular response to posture and exercise. *American Journal of Obstetrics & Gynecology.* 1969. 104:856-864 |
| **K. Ueland, M. J. Novy, E. N. Peterson and J. Metcalfe.** Maternal cardiovascular dynamics. IV. The influence of gestational age on the maternal cardiovascular response to posture and exercise. 1969. 104:856-864 |
| **K. Wulff and R. Siegmund.** Emergence of circadian rhythms in infants before and after birth: evidence for variations by parental influence]. *Z.Geburtshilfe Neonatol.* 2002. 206:166-171 |
| **Kimberly R. Andringa, Tyler Bardsley, Amy H. Herring and SeonAe Yeo.** The Impact of Symptom Type and Frequency on Activity Level During Pregnancy. *Journal of Women's Health Physical Therapy.* 2013. 37:4-10 7p |
| **L. A. Dias, P. Driusso, D. L. Aita, S. M. Quintana, K. Bo and C. H. Ferreira.** Effect of pelvic floor muscle training on labour and newborn outcomes: a randomized controlled trial. *Revista Brasileira de Fisioterapia.* 2011. 15:487-493 |
| **L. A. D'Silva, R. E. Davies, S. J. Emery and M. J. Lewis.** Influence of somatic state on cardiovascular measurements in pregnancy. 2014. 35:15-29 |
| **L. A. Haakstad and K. Bo.** Effect of a regular exercise programme on pelvic girdle and low back pain in previously inactive pregnant women: A randomized controlled trial. 2015. 47:229-234 |
| **L. A. Haakstad and K. Bo.** Effect of regular exercise on prevention of excessive weight gain in pregnancy: a randomised controlled trial. 2011. 16:116-125 |
| **L. A. Haakstad and K. Bo.** PMC3198740; Exercise in pregnant women and birth weight: a randomized controlled trial. *BMC Pregnancy & Childbirth.* 2011. 11:66 |
| **L. A. Haakstad, B. Torset and K. Bo.** What is the effect of regular group exercise on maternal psychological outcomes and common pregnancy complaints? An assessor blinded RCT. *Midwifery.* 2016. 32:81-86 |
| **L. A. Haakstad, E. Edvardsen and K. Bo.** Effect of regular exercise on blood pressure in normotensive pregnant women. A randomized controlled trial. *Hypertension in Pregnancy.* 2016. 35:170-180 |
| **L. A. Haakstad, I. Gundersen and K. Bo.** Self-reporting compared to motion monitor in the measurement of physical activity during pregnancy. 2010. 89:749-756 |
| **L. A. Haakstad, N. Voldner and K. Bo.** Stages of change model for participation in physical activity during pregnancy. 2013. 2013:193170 |
| **L. A. Haakstad, N. Voldner, T. Henriksen and K. Bo.** Physical activity level and weight gain in a cohort of pregnant Norwegian women. 2007. 86:559-564 |
| **L. A. Millard, D. A. Lawlor, A. Fraser and L. D. Howe.** PMC3787488; Physical activity during pregnancy and offspring cardiovascular risk factors: findings from a prospective cohort study.Erratum appears in BMJ Open. 2013;3(12):e003574corr1]. *BMJ Open.* 2013. 3:e003574 |
| **L. A. Pompeii, D. A. Savitz, K. R. Evenson, B. Rogers and M. McMahon.** Physical exertion at work and the risk of preterm delivery and small-for-gestational-age birth. *Obstetrics & Gynecology.* 2005. 106:1279-1288 |
| **L. A. Pompeii, D. A. Savitz, K. R. Evenson, B. Rogers and M. McMahon.** Physical exertion at work and the risk of preterm delivery and small-for-gestational-age birth. 2005. 106:1279-1288 |
| **L. A. Wolfe, A. P. Heenan and A. Bonen.** Aerobic conditioning effects on substrate responses during graded cycling in pregnancy. *Canadian Journal of Physiology & Pharmacology.* 2003. 81:696-703 |
| **L. A. Wolfe, A. P. Heenan and A. Bonen.** Aerobic conditioning effects on substrate responses during graded cycling in pregnancy. 2003. 81:696-703 |
| **L. A. Wolfe, R. J. Preston, G. W. Burggraf and M. J. McGrath.** Effects of pregnancy and chronic exercise on maternal cardiac structure and function. *Canadian Journal of Physiology & Pharmacology.* 1999. 77:909-917 |
| **L. A. Wolfe, R. J. Preston, G. W. Burggraf and M. J. McGrath.** Effects of pregnancy and chronic exercise on maternal cardiac structure and function. 1999. 77:909-917 |
| **L. A. Wolfe, R. J. Preston, G. W. Burggraf and M. J. McGrath.** Effects of pregnancy and chronic exercise on maternal cardiac structure and function. *Can.J.Physiol.Pharmacol.* 1999. 77:909-917 |
| **L. A. Wolfe, R. M. Walker, A. Bonen and M. J. McGrath.** Effects of pregnancy and chronic exercise on respiratory responses to graded exercise. 1994. 76:1928-1936 |
| **L. Atkinson, R. L. Shaw and D. P. French.** Is pregnancy a teachable moment for diet and physical activity behaviour change? An interpretative phenomenological analysis of the experiences of women during their first pregnancy. *British Journal of Health Psychology.* 2016. 11:11 |
| **L. Back, A. Hui, A. Reid, et al.** Comparison of physical activity and nutritional intake in first nations pregnant women in remote communities and urban-living pregnant women. 2012. 36:64-67 |
| **L. Baghirzada, K. N. Downey and A. J. Macarthur.** Assessment of quality of life indicators in the postpartum period. 2013. 22:209-216 |
| **L. Basso, P. T. McCollum, M. R. N. Darling, W. A. Tocchi and W. A. Tanner.** A descriptive study of pregnant women with gallstones. Relation to dietary and social habits, education, physical activity, height, and weight. 1992. 8:629-633 |
| **L. Broberg, A. S. Ersboll, M. G. Backhausen, P. Damm, A. Tabor and H. K. Hegaard.** Compliance with national recommendations for exercise during early pregnancy in a Danish cohort. 2015. 15:317 |
| **L. Broberg, A. S. Ersboll, M. G. Backhausen, P. Damm, A. Tabor and H. K. Hegaard.** Compliance with national recommendations for exercise during early pregnancy in a Danish cohort. *Bmc Pregnancy and Childbirth.* 2015. 15: |
| **L. C. Silveira and C. A. Segre.** Physical exercise during pregnancy and its influence in the type of birth. 2012. 10:409-414 |
| **L. Chasan-Taber, B. H. Marcus, E. Stanek 3, et al.** PMC2851124; A randomized controlled trial of prenatal physical activity to prevent gestational diabetes: design and methods. *Journal of Women's Health.* 2009. 18:851-859 |
| **L. Chasan-Taber, M. D. Schmidt, P. Pekow, B. Sternfeld, J. Manson and G. Markenson.** Correlates of physical activity in pregnancy among Latina women. 2007. 11:353-363 |
| **L. Chasan-Taber, M. D. Schmidt, P. Pekow, et al.** Physical activity and gestational diabetes mellitus among Hispanic women. *Journal of Women's Health.* 2008. 17:999-1008 |
| **L. Chasan-Taber, M. D. Schmidt, P. Pekow, et al.** Physical activity and gestational diabetes mellitus among Hispanic women. 2008. 17:999-1008 |
| **L. Chasan-Taber, M. Silveira, B. H. Marcus, B. Braun, E. Stanek and G. Markenson.** Feasibility and efficacy of a physical activity intervention among pregnant women: the behaviors affecting baby and you (B.A.B.Y.) study. *Journal of physical activity & health.* 2011. 8 Suppl 2:228 |
| **L. Chasan-Taber, M. Silveira, K. E. Lynch, et al.** Physical activity before and during pregnancy and risk of abnormal glucose tolerance among Hispanic women. *Diabetes Metab.* 2014. 40:67-75 |
| **L. Chasan-Taber, M. Silveira, K. E. Lynch, P. Pekow, C. G. Solomon and G. Markenson.** Physical activity and gestational weight gain in Hispanic women. 2014. 22:909-918 |
| **L. Chasan-Taber, M. Silveira, P. Pekow, et al.** Physical activity, sedentary behavior and risk of hypertensive disorders of pregnancy in Hispanic women. 2015. 34:1-16 |
| **L. Chasan-Taber, R. T. Fortner, A. Gollenberg, J. Buonnaccorsi, N. Dole and G. Markenson.** A prospective cohort study of modifiable risk factors for gestational diabetes among Hispanic women: design and baseline characteristics. 2010. 19:117-124 |
| **L. Chu, R. Retnakaran, B. Zinman, A. J. G. Hanley and J. K. Hamilton.** Impact of maternal physical activity and infant feeding practices on infant weight gain and adiposity. 2012. 2012: |
| **L. Currie, C. Woolcott, D. F. Fell, B. A. Armson and L. Dodds.** Physical activity and pregnancy outcomes. *Am.J.Epidemiol.* 2011. 173:S214 |
| **L. D. Devoe, M. Arthur and N. Searle.** The effects of maternal ambulation on the nonstress test. *American Journal of Obstetrics & Gynecology.* 1987. 157:240-244 |
| **L. D. Platt, R. Artal, J. Semel, L. Sipos and R. K. Kammula.** Exercise in pregnancy. II. Fetal responses. *American Journal of Obstetrics & Gynecology.* 1983. 147:487-491 |
| **L. D. Platt, R. Artal, J. Semel, L. Sipos and R. K. Kammula.** Exercise in pregnancy. II. Fetal responses. 1983. 147:487-491 |
| **L. de Wit, J. G. Jelsma, M. N. van Poppel, et al.** Physical activity, depressed mood and pregnancy worries in European obese pregnant women: results from the DALI study. 2015. 15:158 |
| **L. de Wit, J. G. Jelsma, M. N. van Poppel, et al.** PMC4521453; Physical activity, depressed mood and pregnancy worries in European obese pregnant women: results from the DALI study. *BMC Pregnancy & Childbirth.* 2015. 15:158 |
| **L. Dibblee and T. E. Graham.** A longitudinal study of changes in aerobic fitness, body composition, and energy intake in primigravid patients. *American Journal of Obstetrics & Gynecology.* 1983. 147:908-914 |
| **L. E. May, A. Glaros, H. W. Yeh, J. F. Clapp 3 and K. M. Gustafson.** Aerobic exercise during pregnancy influences fetal cardiac autonomic control of heart rate and heart rate variability. *Early Hum.Dev.* 2010. 86:213-217 |
| **L. E. May, J. Knowlton, J. Hanson, et al.** Effects of Exercise During Pregnancy on Maternal Heart Rate and Heart Rate Variability. *Pm & R.* 2016. 8:611-617 |
| **L. E. May, R. R. Suminski, A. Berry, M. D. Langaker and K. M. Gustafson.** Maternal physical activity mode and fetal heart outcome. *Early Hum.Dev.* 2014. 90:365-369 |
| **L. E. May, S. A. Scholtz, R. Suminski and K. M. Gustafson.** Aerobic exercise during pregnancy influences infant heart rate variability at one month of age. *Early Hum.Dev.* 2014. 90:33-38 |
| **L. E. McCullough, M. A. Mendez, E. E. Miller, A. P. Murtha, S. K. Murphy and C. Hoyo.** PMC4622928 Available on 04/30/16]; Associations between prenatal physical activity, birth weight, and DNA methylation at genomically imprinted domains in a multiethnic newborn cohort. *Epigenetics: Official Journal of the DNA Methylation Society.* 2015. 10:597-606 |
| **L. Fairley, G. Santorelli, D. A. Lawlor, et al.** PMC4510905; The relationship between early life modifiable risk factors for childhood obesity, ethnicity and body mass index at age 3 years: findings from the Born in Bradford birth cohort study. *BMC Obesity.* 2015. 2:9 |
| **L. Fenster, A. E. Hubbard, G. C. Windham, K. O. Waller and S. H. Swan.** A prospective study of work-related physical exertion and spontaneous abortion. *Epidemiology.* 1997. 8:66-74 |
| **L. Fenster, A. E. Hubbard, G. C. Windham, K. O. Waller and S. H. Swan.** A prospective study of work-related physical exertion and spontaneous abortion. 1997. 8:66-74 |
| **L. Goni, M. Cuervo, S. Santiago, I. Zazpe and J. A. Martinez.** Parity implications for anthropometrical variables, lifestyle behaviors and dietary habits in pregnant women. *Anales del Sistema Sanitario de Navarra.* 2014. 37:349-362 |
| **L. Goni, M. Cuervo, S. Santiago, I. Zazpe and J. A. Martinez.** Parity implications for anthropometrical variables, lifestyle behaviors and dietary habits in pregnant women. 2014. 37:349-362 |
| **L. H. Colbert, B. I. Graubard, K. B. Michels, W. C. Willett and M. R. Forman.** Physical activity during pregnancy and age at menarche of the daughter. *Cancer Epidemiology Biomarkers & Prevention.* 2008. 17:2656-2662 |
| **L. Haakstad and K. Bo.** Effect of supervised aerobic dance exercise in prevention of excessive weight gain in pregnancy: A single blind randomized controlled trial. *International Journal of Gynecology and Obstetrics.* 2009. 107:S198 |
| **L. Hayes, C. McParlin, T. I. Kinnunen, et al.** Change in level of physical activity during pregnancy in obese women: findings from the UPBEAT pilot trial. 2015. 15:52 |
| **L. Hayes, C. McParlin, T. I. Kinnunen, et al.** Change in level of physical activity during pregnancy in obese women: findings from the UPBEAT pilot trial. *BMC pregnancy and childbirth.* 2015. 15:52 |
| **L. Hayes, C. McParlin, T. I. Kinnunen, et al.** PMC4352291; Change in level of physical activity during pregnancy in obese women: findings from the UPBEAT pilot trial. *BMC Pregnancy & Childbirth.* 2015. 15:52 |
| **L. Hayes, R. Bell, S. C. Robson and L. Poston.** Physical activity in the uk pregnancy better eating and physical activity trial (UPBEAT). *Diabetic Med.* 2016. 33:6-7 |
| **L. J. Lee, E. Symanski, P. J. Lupo, et al.** HHSPA786527 Available on 02/01/17] PMC4888062 Available on 02/01/17]; Data linkage between the National Birth Defects Prevention Study and the Occupational Information Network (O NET) to assess workplace physical activity, sedentary behaviors, and emotional stressors during pregnancy. *Am.J.Ind.Med.* 2016. 59:137-149 |
| **L. J. Mayberry, M. Smith and P. Gill.** Effect of exercise on uterine activity in the patient in preterm labor. 1992. 12:354-358 |
| **L. Jovanovic, A. Kessler and C. M. Peterson.** Human maternal and fetal response to graded exercise. *J.Appl.Physiol.* 1985. 58:1719-1722 |
| **L. Jovanovic-Peterson, E. P. Durak and C. M. Peterson.** Randomized trial of diet versus diet plus cardiovascular conditioning on glucose levels in gestational diabetes. *American Journal of Obstetrics & Gynecology.* 1989. 161:415-419 |
| **L. Jovanovic-Peterson, E. P. Durak and C. M. Peterson.** Randomized trial of diet versus diet plus cardiovascular conditioning on glucose levels in gestational diabetes. 1989. 161:415-419 |
| **L. K. Andersen, M. Backhausen, H. K. Hegaard and M. Juhl.** Physical exercise and pelvic girdle pain in pregnancy: A nested case-control study within the Danish National Birth Cohort. 2015. 6:198-203 |
| **L. K. Badr, B. Abdallah and A. Mahmoud.** Precursors of preterm birth: comparison of three ethnic groups in the middle East and the United States. 2005. 34:444-452 |
| **L. K. Callaway, P. B. Colditz, N. M. Byrne, et al.** PMC2890340; Prevention of gestational diabetes: feasibility issues for an exercise intervention in obese pregnant women. *Diabetes Care.* 2010. 33:1457-1459 |
| **L. K. Callaway, P. B. Colditz, N. M. Byrne, et al.** Prevention of gestational diabetes: feasibility issues for an exercise intervention in obese pregnant women. 2010. 33:1457-1459 |
| **L. K. Micklesfield, N. S. Levitt, M. T. Carstens, M. A. Dhansay, S. A. Norris and E. V. Lambert.** Early life and current determinants of bone in South African children of mixed ancestral origin. 2007. 34:647-655 |
| **L. Kovaleva.** Assessment of risk factors of urinary incontinence in pregnancy, effect of pelvic floor muscle training. *Int.Urogynecol.J.Pelvic Floor Dysfunct.* 2011. 22:S1473 |
| **L. Larsson and P. G. Lindqvist.** Low-impact exercise during pregnancy--a study of safety. *Acta Obstet.Gynecol.Scand.* 2005. 84:34-38 |
| **L. Larsson and P. G. Lindqvist.** Low-impact exercise during pregnancy--a study of safety. 2005. 84:34-38 |
| **L. M. Currie, C. G. Woolcott, D. B. Fell, B. A. Armson and L. Dodds.** The association between physical activity and maternal and neonatal outcomes: a prospective cohort. *Maternal & Child Health Journal.* 2014. 18:1823-1830 |
| **L. M. E. McCowan, C. T. Roberts, G. A. Dekker, et al.** Risk factors for small-for-gestational-age infants by customised birthweight centiles: Data from an international prospective cohort study. 2010. 117:1599-1607 |
| **L. M. McCowan, C. T. Roberts, G. A. Dekker, et al.** Risk factors for small-for-gestational-age infants by customised birthweight centiles: data from an international prospective cohort study. *BJOG: An International Journal of Obstetrics & Gynaecology.* 2010. 117:1599-1607 |
| **L. M. Mudd, J. Pivarnik, C. B. Holzman, N. Paneth, K. Pfeiffer and H. Chung.** NIHMS574330 PMC4051283; Leisure-time physical activity in pregnancy and the birth weight distribution: where is the effect?. *Journal of Physical Activity & Health.* 2012. 9:1168-1177 |
| **L. M. Mudd, J. Pivarnik, C. B. Holzman, N. Paneth, K. Pfeiffer and H. Chung.** Leisure-time physical activity in pregnancy and the birth weight distribution: where is the effect?. 2012. 9:1168-1177 |
| **L. M. Sorbye, K. Klungsoyr, O. Samdal, K. M. Owe and N. H. Morken.** NIHMS649381 Available on 09/01/16] PMC4523494 Available on 09/01/16]; Pre-pregnant body mass index and recreational physical activity: effects on perinatal mortality in a prospective pregnancy cohort. *BJOG: An International Journal of Obstetrics & Gynaecology.* 2015. 122:1322-1330 |
| **L. M. Szymanski and A. J. Satin.** NIHMS351567 PMC3297473; Exercise during pregnancy: fetal responses to current public health guidelines. *Obstetrics & Gynecology.* 2012. 119:603-610 |
| **L. M. Szymanski and A. J. Satin.** NIHMS395779 PMC3464969; Strenuous exercise during pregnancy: is there a limit?. *American Journal of Obstetrics & Gynecology.* 2012. 207:179.e1-179.e6 |
| **L. Mason, B. Roe, H. Wong, J. Davies and J. Bamber.** The role of antenatal pelvic floor muscle exercises in prevention of postpartum stress incontinence: a randomised controlled trial. 2010. 19:2777-2786 |
| **L. Mason, S. Glenn, I. Walton and C. Hughes.** Do women practise pelvic floor exercises during pregnancy or following delivery?. 2001. 87:662-670 |
| **L. Mason, S. Glenn, I. Walton and C. Hughes.** The relationship between between ante-natal pelvic floor muscle exercises and post-partum stress incontinence. 2001. 87:651-670 14 |
| **L. Mason.** Stress incontinence in childbearing women. 2001. 7:72-75 4 |
| **L. Nilsson-Wikmar, K. Holm, R. Oijerstedt and K. Harms-Ringdahl.** Effect of three different physical therapy treatments on pain and activity in pregnant women with pelvic girdle pain: A randomized clinical trial with 3, 6, and 12 months follow-up postpartum. *Spine.* 2005. 30:850-856 |
| **L. Nilsson-Wikmar, K. Holm, R. Oijerstedt and K. Harms-Ringdahl.** Effect of three different physical therapy treatments on pain and activity in pregnant women with pelvic girdle pain: a randomized clinical trial with 3, 6, and 12 months follow-up postpartum. 2005. 30:850-856 |
| **L. Orawan and W. Preecha.** Effect of pelvic floor muscle training (PFMT) during pregnancy on bladder neck descend and delivery. *Journal of the Medical Association of Thailand.* 2014. 97:S156-S163 |
| **L. Pijpers, J. W. Wladimiroff and J. McGhie.** Effect of short-term maternal exercise on maternal and fetal cardiovascular dynamics. *British Journal of Obstetrics & Gynaecology.* 1984. 91:1081-1086 |
| **L. Poston, A. L. Briley, S. Barr, et al.** PMC3718630; Developing a complex intervention for diet and activity behaviour change in obese pregnant women (the UPBEAT trial); assessment of behavioural change and process evaluation in a pilot randomised controlled trial. *BMC Pregnancy & Childbirth.* 2013. 13:148 |
| **L. Poston, R. Bell, H. Croker, et al.** Effect of a behavioural intervention in obese pregnant women (the UPBEAT study): A multicentre, randomised controlled trial. *The Lancet Diabetes and Endocrinology.* 2015. 3:767-777 |
| **L. R. D. Varella, V. B. Torres, P. H. M. Angelo, et al.** Influence of parity, type of delivery, and physical activity level on pelvic floor muscles in postmenopausal women. *Journal of Physical Therapy Science.* 2016. 28:824-830 |
| **L. R. Sagedal, B. Sanda, N. C. Overby, et al.** The effect of prenatal lifestyle intervention on weight retention 12 months postpartum: results of the Norwegian Fit for Delivery randomised controlled trial. *BJOG: An International Journal of Obstetrics & Gynaecology.* 2016. 20:20 |
| **L. R. Sagedal, N. C. Overby, E. Bere, et al.** Lifestyle intervention to limit gestational weight gain: the Norwegian Fit for Delivery randomised controlled trial. *BJOG: An International Journal of Obstetrics & Gynaecology.* 2016. 14:14 |
| **L. R. Sagedal, N. C. Overby, H. Lohne-Seiler, et al.** PMC3577450; Study protocol: fit for delivery - can a lifestyle intervention in pregnancy result in measurable health benefits for mothers and newborns? A randomized controlled trial. *BMC Public Health.* 2013. 13:132 |
| **L. R. Varella, V. B. Torres, P. H. Angelo, et al.** PMC4842447; Influence of parity, type of delivery, and physical activity level on pelvic floor muscles in postmenopausal women. *Journal of Physical Therapy Science.* 2016. 28:824-830 |
| **L. Rodr**. Treatment compliance in pregnant women with gestational diabetes after an education program: relationship with anxiety and sociodemographic variables. 2004. 14:318-327 10 |
| **L. S. Adair, C. W. Kuzawa and J. Borja.** Maternal energy stores and diet composition during pregnancy program adolescent blood pressure. *Circulation.* 2001. 104:1034-1039 |
| **L. Schack-Nielsen, C. Molgaard, D. Larsen, C. Martyn and K. F. Michaelsen.** Arterial stiffness in 10-year-old children: Current and early determinants. 2005. 94:1004-1011 |
| **L. Sibley, R. O. Ruhling, J. Cameron-Foster, C. Christensen and T. Bolen.** Swimming and physical fitness during pregnancy. *J.Nurse.* 1981. 26:3-12 |
| **L. Spatling, F. Fallenstein, A. Huch, R. Huch and G. Rooth.** The variability of cardiopulmonary adaptation to pregnancy at rest and during exercise. 1992. 99 Suppl 8:1-40 |
| **L. Z. Jaime, B. M. Manuela, O. C. Catalina, J. M. I. Mar**. Physical activity level according to GPAQ in pregnant and postpartum women attended in a family health center. *Rev.Chil.Obstet.Ginecol.* 2013. 78:425-431 |
| **L. Z. Jaime, B. M. Manuela, O. C. Catalina, J. M. I. Mar**. Physical activity level according to GPAQ in pregnant and postpartum women attended in a family health center. 2013. 78:425-431 |
| **L. Zhu, L. Li, J. H. Lang and T. Xu.** Prevalence and risk factors for peri- and postpartum urinary incontinence in primiparous women in China: a prospective longitudinal study. 2012. 23:563-572 |
| **Lanay M. Mudd, Jim M. Pivarnik, Karin A. Pfeiffer, Nigel Paneth, Hwan Chung and Claudia Holzman.** Maternal physical activity during pregnancy, child leisure-time activity, and child weight status at 3 to 9 years. *Journal of Physical Activity & Health.* 2015. 12:506-514 |
| **Lisa A. Uebelacker, Cynthia L. Battle, Kaeli A. Sutton, Susanna R. Magee and Ivan W. Miller.** A pilot randomized controlled trial comparing prenatal yoga to perinatal health education for antenatal depression. 2015. No Pagination Specified |
| **Lou Atkinson, Ellinor K. Olander and David P. French.** Acceptability of a weight management intervention for pregnant and postpartum women with BMI >30 kg/m2: A qualitative evaluation of an individualized, home-based service. *Matern.Child Health J.* 2016. 20:88-96 |
| **Lucy C. Chappell, Paul T. Seed, Jenny Myers, et al.** Exploration and confirmation of factors associated with uncomplicated pregnancy in nulliparous women: prospective cohort study. 2015. 49:136-136 |
| **M. A. Carvalhaes, A. C. Martiniano, M. B. Malta, M. Y. Takito and M. H. Benicio.** [Physical activity in pregnant women receiving care in primary health care units]. 2013. 47:958-967 |
| **M. A. Klebanoff, P. H. Shiono and J. C. Carey.** The effect of physical activity during pregnancy on preterm delivery and birth weight. *American Journal of Obstetrics & Gynecology.* 1990. 163:1450-1456 |
| **M. A. Kominiarek.** A survey of health behaviors in minority women in pregnancy: the influence of body mass index. 2014. 24:e291-5 |
| **M. A. Manders, G. J. Sonder, E. J. Mulder and G. H. Visser.** The effects of maternal exercise on fetal heart rate and movement patterns. *Early Hum.Dev.* 1997. 48:237-247 |
| **M. A. Q. Mutsaerts, H. Groen, Der Meer Buiter-Van, et al.** Effects of paternal and maternal lifestyle factors on pregnancy complications and perinatal outcome. A Dutch population-based birth-cohort study: The GECKO Drenthe study. *Human Reproduction.* 2012. 27: |
| **M. A. Sady, B. B. Haydon, S. P. Sady, M. W. Carpenter, P. D. Thompson and D. R. Coustan.** Cardiovascular-response to maximal cycle exercise during pregnancy and at 2 and 7 months post partum. *Obstet.Gynecol.* 1990. 162:1181-1185 |
| **M. A. Sady, B. B. Haydon, S. P. Sady, M. W. Carpenter, P. D. Thompson and D. R. Coustan.** Cardiovascular response to maximal cycle exercise during pregnancy and at two and seven months post partum. 1990. 162:1181-1185 |
| **M. A. Szmeja, C. Cramp, R. M. Grivell, A. R. Deussen, L. N. Yelland and J. M. Dodd.** PMC4280000; Use of a DVD to provide dietary and lifestyle information to pregnant women who are overweight or obese: a nested randomised trial. *BMC Pregnancy & Childbirth.* 2014. 14:409 |
| **M. A. Szmeja, C. Cramp, R. M. Grivell, A. R. Deussen, L. N. Yelland and J. M. Dodd.** Use of a DVD to provide dietary and lifestyle information to pregnant women who are overweight or obese: a nested randomised trial. 2014. 14:409 |
| **M. A. Szmeja, C. Cramp, R. M. Grivell, A. R. Deussen, L. N. Yelland and J. M. Dodd.** Use of a DVD to provide dietary and lifestyle information to pregnant women who are overweight or obese: a nested randomised trial. *BMC pregnancy and childbirth.* 2014. 14:12 |
| **M. Aittasalo, J. Raitanen, T. I. Kinnunen, K. Ojala, P. Kolu and R. Luoto.** Is intensive counseling in maternity care feasible and effective in promoting physical activity among women at risk for gestational diabetes? Secondary analysis of a cluster randomized NELLI study in Finland. *International Journal of Behavioral Nutrition and Physical Activity.* 2012. 9 (no pagination): |
| **M. Aittasalo, M. Pasanen, M. Fogelholm, T. I. Kinnunen, K. Ojala and R. Luoto.** Physical activity counseling in maternity and child health care - A controlled trial. *BMC Womens Health.* 2008. 8: |
| **M. Aittasalo, M. Pasanen, M. Fogelholm, T. I. Kinnunen, K. Ojala and R. Luoto.** Physical activity counseling in maternity and child health care - a controlled trial. 2008. 8:14 |
| **M. B. Sexton, H. A. Flynn, C. Lancaster, et al.** Predictors of recovery from prenatal depressive symptoms from pregnancy through postpartum. 2012. 21:43-49 |
| **M. B. van Doorn, F. K. Lotgering, P. C. Struijk, J. Pool and H. C. Wallenburg.** Maternal and fetal cardiovascular responses to strenuous bicycle exercise. *American Journal of Obstetrics & Gynecology.* 1992. 166:854-859 |
| **M. Bisson, C. Rheaume, E. Bujold, A. Tremblay and I. Marc.** Modulation of blood pressure response to exercise by physical activity and relationshipwith resting blood pressure during pregnancy. *J.Hypertens.* 2014. 32:1450-1457 |
| **M. Bisson, C. Rheaume, E. Bujold, A. Tremblay and I. Marc.** Modulation of blood pressure response to exercise by physical activity and relationship with resting blood pressure during pregnancy. 2014. 32:1450-7; discussion 1457 |
| **M. Bisson, N. Almeras, J. Plaisance, et al.** Maternal fitness at the onset of the second trimester of pregnancy: correlates and relationship with infant birth weight. *Pediatric Obesity.* 2013. 8:464-474 |
| **M. Bisson, N. Almeras, S. S. Dufresne, et al.** A 12-Week Exercise Program for Pregnant Women with Obesity to Improve Physical Activity Levels: An Open Randomised Preliminary Study. *Plos One.* 2015. 10: |
| **M. Bonzini, D. Coggon, K. Godfrey, H. Inskip, S. Crozier and K. T. Palmer.** PMC3088899 UKMS35217; Occupational physical activities, working hours and outcome of pregnancy: findings from the Southampton Women's Survey. *Occupational & Environmental Medicine.* 2009. 66:685-690 |
| **M. Bonzini, D. Coggon, K. Godfrey, H. Inskip, S. Crozier and K. T. Palmer.** Occupational physical activities, working hours and outcome of pregnancy: findings from the Southampton Women's Survey. 2009. 66:685-690 |
| **M. C. de Barros, M. A. Lopes, R. P. Francisco, A. D. Sapienza and M. Zugaib.** Resistance exercise and glycemic control in women with gestational diabetes mellitus. *American Journal of Obstetrics & Gynecology.* 2010. 203:556.e1-556.e6 |
| **M. C. Hatch, X. O. Shu, D. E. McLean, et al.** Maternal exercise during pregnancy, physical fitness, and fetal growth. *Am.J.Epidemiol.* 1993. 137:1105-1114 |
| **M. Connelly, H. Brown, P. van der Pligt and M. Teychenne.** Modifiable barriers to leisure-time physical activity during pregnancy: a qualitative study investigating first time mother's views and experiences. 2015. 15:100 |
| **M. D. Avery and A. J. Walker.** Acute effect of exercise on blood glucose and insulin levels in women with gestational diabetes. 2001. 10:52-58 |
| **M. D. Avery, A. S. Leon and R. A. Kopher.** Effects of a partially home-based exercise program for women with gestational diabetes. 1997. 89:10-15 |
| **M. D. Hennessy, S. L. Volpe, M. D. Sammel and S. Gennaro.** Skipping meals and less walking among African Americans diagnosed with preterm labor. *Journal of Nursing Scholarship.* 2010. 42:147-155 |
| **M. D. Schmidt, P. Pekow, P. S. Freedson, G. Markenson and L. Chasan-Taber.** Physical activity patterns during pregnancy in a diverse population of women. *Journal of Women's Health.* 2006. 15:909-918 |
| **M. D. Schmidt, P. Pekow, P. S. Freedson, G. Markenson and L. Chasan-Taber.** Physical activity patterns during pregnancy in a diverse population of women. 2006. 15:909-918 |
| **M. Dekker Nitert, H. L. Barrett, K. J. Denny, H. D. McIntyre and L. K. Callaway.** Exercise in pregnancy does not alter gestational weight gain, MCP-1 or leptin in obese women. *Australian and New Zealand Journal of Obstetrics and Gynaecology.* 2015. 55:27-33 |
| **M. Dello Russo, W. Ahrens, T. De Vriendt, et al.** Gestational weight gain and adiposity, fat distribution, metabolic profile, and blood pressure in offspring: the IDEFICS project. *Int.J.Obes.* 2013. 37:914-919 |
| **M. Dimov, J. Khoury and R. Tsang.** Bone mineral loss during pregnancy: is tennis protective?. *Journal of Physical Activity & Health.* 2010. 7:239-245 |
| **M. Dimov, J. Khoury and R. Tsang.** Bone mineral loss during pregnancy: is tennis protective?. 2010. 7:239-245 |
| **M. Doustan, M. Seifourian, M. Zarghami and T. Azmsha.** Relationship between physical activity of mothers before and during pregnancy with the newborn health and pregnancy outcome. *Journal of Physical Education and Sport.* 2012. 12:222-229 |
| **M. Doustan, M. Seifourian, M. Zarghami and T. Azmsha.** Relationship between physical activity of mothers before and during pregnancy with the newborn health and pregnancy outcome. 2012. 12:222-229 |
| **M. E. Bolton.** Scuba diving and fetal well-being: a survey of 208 women. 1980. 7:183-189 |
| **M. E. O'Neill, K. A. Cooper, C. M. Cook, B. J. Trudinger, E. S. Boyce and S. N. Hunyor.** The influence of exercise intensity on the umbilical artery flow velocity waveform and foetal heart rate response to moderate duration, semi-supine cycling in late pregnancy. *Aust.J.Sci.Med.Sport.* 1991. 23:101-104 |
| **M. E. O'Neill, K. A. Cooper, C. M. Mills, E. S. Boyce and S. N. Hunyor.** Accuracy of Borg's ratings of perceived exertion in the prediction of heart rates during pregnancy. 1992. 26:121-124 |
| **M. E. O'Neill, K. A. Cooper, E. S. Boyce and S. N. Hunyor.** Postural effects when cycling in late pregnancy. *Women & Birth: Journal of the Australian College of Midwives.* 2006. 19:107-111 |
| **M. E. O'Neill, K. A. Cooper, S. N. Hunyor and S. Boyce.** Cardiorespiratory response to walking in trained and sedentary pregnant women. *J.Sports Med.Phys.Fitness.* 1993. 33:40-43 |
| **M. E. O'Neill, K. A. Cooper, S. N. Hunyor and S. Boyce.** Cardiorespiratory response to walking in trained and sedentary pregnant women. *J.Sports Med.Phys.Fitness.* 1993. 33:40-43 |
| **M. E. O'Neill.** PMC1332262; Maternal rectal temperature and fetal heart rate responses to upright cycling in late pregnancy. *Br.J.Sports Med.* 1996. 30:32-35 |
| **M. F. Hjorth, S. Kloster, T. Girma, et al.** Level and intensity of objectively assessed physical activity among pregnant women from urban Ethiopia. 2012. 12:154 |
| **M. F. Hjorth, S. Kloster, T. Girma, et al.** Level and intensity of objectively assessed physical activity among pregnant women from urban Ethiopia. *BMC Pregnancy and Childbirth.* 2012. 12 (no pagination): |
| **M. F. Hjorth, S. Kloster, T. Girma, et al.** PMC3543321; Level and intensity of objectively assessed physical activity among pregnant women from urban Ethiopia. *BMC Pregnancy & Childbirth.* 2012. 12:154 |
| **M. F. Mottola, I. Giroux, R. Gratton, et al.** Nutrition and exercise prevent excess weight gain in overweight pregnant women. 2010. 42:265-272 |
| **M. F. Mottola, M. H. Davenport, C. R. Brun, S. D. Inglis, S. Charlesworth and M. M. Sopper.** VO2peak prediction and exercise prescription for pregnant women. 2006. 38:1389-1395 |
| **M. F. Mottola, M. H. Davenport, C. R. Brun, S. D. Inglis, S. Charlesworth and M. M. Sopper.** VO2peak prediction and exercise prescription for pregnant women. *Med.Sci.Sports Exerc.* 2006. 38:1389-1395 |
| **M. F. Mottola, S. Inglis, C. R. Brun and J. A. Hammond.** Physiological and metabolic responses of late pregnant women to 40 min of steady-state exercise followed by an oral glucose tolerance perturbation. *J.Appl.Physiol.* 2013. 115:597-604 |
| **M. F. Sowers, T. Scholl, L. Harris and M. Jannausch.** Bone loss in adolescent and adult pregnant women. 2000. 96:189-193 |
| **M. G. Backhausen, M. Katballe, H. Hansson, A. Tabor, P. Damm and H. K. Hegaard.** A standardised individual unsupervised water exercise intervention for healthy pregnant women. A qualitative feasibility study. 2014. 5:176-181 |
| **M. Gharaibeh, R. Al-Ma'aitah and N. Al Jada.** Lifestyle practices of Jordanian pregnant women. 2005. 52:92-100 |
| **M. Gojnic, M. Perovic, M. Pervulov and A. Ljubic.** The effects of adjuvant insulin therapy among pregnant women with IGT who failed to achieve the desired glycemia levels by diet and moderate physical activity. *Journal of Maternal-Fetal and Neonatal Medicine.* 2012. 25:2028-2034 |
| **M. Goodarzi Khoigani, Z. Paknahad and F. Mardanian.** The relationship between nutrients intake and preeclampsia in pregnant women. 2012. 17:S210-S217 |
| **M. Gustafsson, S. Stafne, P. Romundstad, S. Mørkved, K. Salvesen and A. S. Helvik.** The effects of an exercise programme during pregnancy on health-related quality of life in pregnant women: A Norwegian randomised controlled trial. *BJOG: An International Journal of Obstetrics and Gynaecology.* 2015. |
| **M. Guszkowska, K. Sempolska, A. Zaremba and M. Langwald.** Exercise or relaxation? Which is more effective in improving the emotional state of pregnant women?. 2013. 14:168-174 |
| **M. Guszkowska, M. Langwald and K. Sempolska.** Does Physical Exercise Help Maintain Mental Health During Pregnancy? A Comparison of Changes in Mental Health in Participants of Physical Exercise Classes and Childbirth Classes. *Journal of Physical Activity & Health.* 2015. 12:30-36 |
| **M. Guszkowska, M. Langwald and K. Sempolska.** Does physical exercise help maintain mental health during pregnancy? A comparison of changes in mental health in participants of physical exercise classes and childbirth classes. 2015. 12:30-36 |
| **M. Guszkowska, M. Langwald and K. Sempolska.** Does physical exercise help maintain mental health during pregnancy? A comparison of changes in mental health in participants of physical exercise classes and childbirth classes. *Journal of physical activity & health.* 2015. 12:30-36 |
| **M. Guszkowska, M. Langwald and K. Sempolska.** Influence of a relaxation session and an exercise class on emotional states in pregnant women. *Journal of Reproductive and Infant Psychology.* 2013. 31:121-133 |
| **M. Guszkowska, M. Langwald and K. Sempolska.** Influence of a relaxation session and an exercise class on emotional states in pregnant women. 2013. 31:121-133 |
| **M. Guszkowska, M. Langwald, D. Dudziak and A. Zaremba.** Influence of a single physical exercise class on mood states of pregnant women. *Journal of Psychosomatic Obstetrics and Gynecology.* 2013. 34:98-104 |
| **M. Guszkowska, M. Langwald, D. Dudziak and A. Zaremba.** Influence of a single physical exercise class on mood states of pregnant women. 2013. 34:98-104 |
| **M. Guszkowska.** The effect of exercise and childbirth classes on fear of childbirth and locus of labor pain control. 2014. 27:176-189 |
| **M. H. Black, D. A. Sacks, A. H. Xiang and J. M. Lawrence.** PMC3526206; The relative contribution of prepregnancy overweight and obesity, gestational weight gain, and IADPSG-defined gestational diabetes mellitus to fetal overgrowth. *Diabetes Care.* 2013. 36:56-62 |
| **M. H. Davenport, C. D. Steinback and M. F. Mottola.** Impact of pregnancy and obesity on cardiorespiratory responses during weight-bearing exercise. *Respiratory Physiology and Neurobiology.* 2009. 167:341-347 |
| **M. H. Davenport, C. D. Steinback and M. F. Mottola.** Impact of pregnancy and obesity on cardiorespiratory responses during weight-bearing exercise. 2009. 167:341-347 |
| **M. H. Davenport, M. F. Mottola, R. McManus and R. Gratton.** A walking intervention improves capillary glucose control in women with gestational diabetes mellitus: a pilot study. 2008. 33:511-517 |
| **M. H. Davenport, S. Charlesworth, D. Vanderspank, M. M. Sopper and M. F. Mottola.** Development and validation of exercise target heart rate zones for overweight and obese pregnant women. 2008. 33:984-989 |
| **M. H. Eggen, B. Stuge, P. Mowinckel, K. S. Jensen and K. B. Hagen.** Can supervised group exercises including ergonomic advice reduce the prevalence and severity of low back pain and pelvic girdle pain in pregnancy? A randomized controlled trial. 2012. 92:781-790 |
| **M. Hatch, B. Levin, X. O. Shu and M. Susser.** PMC1508461; Maternal leisure-time exercise and timely delivery. *Am.J.Public Health.* 1998. 88:1528-1533 |
| **M. Hatch, B. T. Ji, X. O. Shu and M. Susser.** Do standing, lifting, climbing, or long hours of work during pregnancy have an effect on fetal growth?. *Epidemiology.* 1997. 8:530-536 |
| **M. Hatch, B. T. Ji, X. O. Shu and M. Susser.** Do standing, lifting, climbing, or long hours of work during pregnancy have an effect on fetal growth?. 1997. 8:530-536 |
| **M. Hawkins, B. Braun, B. H. Marcus, E. Stanek 3, G. Markenson and L. Chasan-Taber.** PMC4479080; The impact of an exercise intervention on C - reactive protein during pregnancy: a randomized controlled trial. *BMC Pregnancy & Childbirth.* 2015. 15:139 |
| **M. Hawkins, B. Braun, B. H. Marcus, E. Stanek 3rd, G. Markenson and L. Chasan-Taber.** The impact of an exercise intervention on C - reactive protein during pregnancy: a randomized controlled trial. 2015. 15:139 |
| **M. Hawkins, L. Chasan-Taber, B. Marcus, et al.** Impact of an exercise intervention on physical activity during pregnancy: the behaviors affecting baby and you study. 2014. 104:e74-81 |
| **M. Hawkins, L. Chasan-Taber, B. Marcus, et al.** PMC4167076 Available on 10/01/15]; Impact of an exercise intervention on physical activity during pregnancy: the behaviors affecting baby and you study. *Am.J.Public Health.* 2014. 104:e74-81 |
| **M. Hawkins, M. Hosker, B. H. Marcus, et al.** A pregnancy lifestyle intervention to prevent gestational diabetes risk factors in overweight Hispanic women: a feasibility randomized controlled trial. 2015. 32:108-115 |
| **M. Hawkins, P. Pekow and L. Chasan-Taber.** Physical activity, sedentary behavior, and C-reactive protein in pregnancy. 2014. 46:284-292 |
| **M. Hayman, C. Short and P. Reaburn.** An investigation into the exercise behaviours of regionally based Australian pregnant women. 2015. |
| **M. I. Both, M. A. Overvest, M. F. Wildhagen, J. Golding and H. I. Wildschut.** PMC2896625; The association of daily physical activity and birth outcome: a population-based cohort study. *Eur.J.Epidemiol.* 2010. 25:421-429 |
| **M. I. Both, M. A. Overvest, M. F. Wildhagen, J. Golding and H. I. Wildschut.** The association of daily physical activity and birth outcome: a population-based cohort study. 2010. 25:421-429 |
| **M. J. Berry, R. G. McMurray and V. L. Katz.** Pulmonary and ventilatory responses to pregnancy, immersion, and exercise. 1989. 66:857-862 |
| **M. J. Edwards, J. Metcalfe, M. J. Dunham and M. S. Paul.** Accelerated respiratory response to moderate exercise in late pregnancy. *Respir.Physiol.* 1981. 45:229-241 |
| **M. J. Edwards, J. Metcalfe, M. J. Dunham and M. S. Paul.** Accelerated respiratory response to moderate exercise in late pregnancy. 1981. 45:229-241 |
| **M. J. Mantle, R. M. Greenwood and H. L. F. Currey.** Backache in pregnancy. 1977. 16:95-101 |
| **M. J. Morton, M. S. Paul, G. R. Campos, M. V. Hart and J. Metcalfe.** Exercise dynamics in late gestation: effects of physical training. *American Journal of Obstetrics & Gynecology.* 1985. 152:91-97 |
| **M. J. Morton, M. S. Paul, G. R. Campos, M. V. Hart and J. Metcalfe.** Exercise dynamics in late gestation: effects of physical training. 1985. 152:91-97 |
| **M. J. Nieuwenhuijsen, K. Northstone, J. Golding and Alspac Study Team.** Swimming and birth weight. *Epidemiology.* 2002. 13:725-728 |
| **M. J. Ong, K. E. Wallman, P. A. Fournier, J. P. Newnham and K. J. Guelfi.** PMC4946108; Enhancing energy expenditure and enjoyment of exercise during pregnancy through the addition of brief higher intensity intervals to traditional continuous moderate intensity cycling. *BMC Pregnancy & Childbirth.* 2016. 16:161 |
| **M. J. Ong, K. J. Guelfi, T. Hunter, K. E. Wallman, P. A. Fournier and J. P. Newnham.** Supervised home-based exercise may attenuate the decline of glucose tolerance in obese pregnant women. 2009. 35:418-421 |
| **M. J. Ong, K. J. Guelfi, T. Hunter, K. E. Wallman, P. A. Fournier and J. P. Newnham.** Supervised home-based exercise may attenuate the decline of glucose tolerance in obese pregnant women. *Diabetes and Metabolism.* 2009. 35:418-421 |
| **M. J. Saurel-Cubizolles, D. Subtil and M. Kaminski.** Is preterm delivery still related to physical working conditions in pregnancy?. 1991. 45:29-34 |
| **M. J. Saurel-Cubizolles, M. Kaminski, C. Du Mazaubrun and G. Breart.** Working conditions and arterial hypertension during pregnancy. [French]. 1991. 39:37-43 |
| **M. J. Saurel-Cubizolles, M. Kaminski, C. Du Mazaubrun, J. Llado and M. Estryn-Behar.** High blood pressure during pregnancy and working conditions among hospital personnel. 1991. 40:29-34 |
| **M. J. Shim, Y. S. Lee, H. E. Oh and J. S. Kim.** Effects of a back-pain-reducing program during pregnancy for Korean women: a non-equivalent control-group pretest-posttest study. 2007. 44:19-28 |
| **M. Jedrzejko, K. Nowosielski, R. Poreba, I. Ulman-Wlodarz and R. Bobinski.** Physical efficiency and activity energy expenditure in term pregnancy females measured during cardiopulmonary exercise tests with a supine cycle ergometer. *Journal of Maternal-Fetal & Neonatal Medicine.* 2016. 1-22 |
| **M. Jozwik and M. Jozwik.** The physiological basis of pelvic floor exercises in the treatment of stress urinary incontinence. *Br.J.Obstet.Gynaecol.* 1998. 105:1046-1051 |
| **M. Juhl, J. Olsen, P. K. Andersen, E. A. Nohr and A. M. Andersen.** Physical exercise during pregnancy and fetal growth measures: a study within the Danish National Birth Cohort. *American Journal of Obstetrics & Gynecology.* 2010. 202:63.e1-63.e8 |
| **M. Juhl, J. Olsen, P. K. Andersen, E. A. Nohr and A. M. Andersen.** Physical exercise during pregnancy and fetal growth measures: a study within the Danish National Birth Cohort. 2010. 202:63.e1-63.e8 |
| **M. Juhl, K. Strandberg-Larsen, P. S. Larsen, et al.** Occupational lifting during pregnancy and risk of fetal death in a large national cohort study. *Scandinavian Journal of Work, Environment and Health.* 2013. 39:335-342 |
| **M. Juhl, K. Strandberg-Larsen, P. S. Larsen, et al.** Occupational lifting during pregnancy and risk of fetal death in a large national cohort study. 2013. 39:335-342 |
| **M. Juhl, M. Kogevinas, P. K. Andersen, A. M. Andersen and J. Olsen.** Is swimming during pregnancy a safe exercise?. *Epidemiology.* 2010. 21:253-258 |
| **M. Juhl, M. Madsen, A. M. N. Andersen, P. K. Andersen and J. Olsen.** Distribution and predictors of exercise habits among pregnant women in the Danish National Birth Cohort. 2012. 22:128-138 |
| **M. Juhl, P. K. Andersen, J. Olsen and A. M. Andersen.** Psychosocial and physical work environment, and risk of pelvic pain in pregnancy. A study within the Danish national birth cohort. 2005. 59:580-585 |
| **M. Juhl, P. K. Andersen, J. Olsen, et al.** Physical exercise during pregnancy and the risk of preterm birth: a study within the Danish National Birth Cohort. *Am.J.Epidemiol.* 2008. 167:859-866 |
| **M. Juhl, P. K. Andersen, J. Olsen, et al.** Physical exercise during pregnancy and the risk of preterm birth: a study within the Danish National Birth Cohort. 2008. 167:859-866 |
| **M. Juhl, P. S. Larsen, P. K. Andersen, et al.** Occupational lifting during pregnancy and child's birth size in a large cohort study. *Scandinavian Journal of Work, Environment and Health.* 2014. 40:411-419 |
| **M. Juhl, P. S. Larsen, P. K. Andersen, et al.** Occupational lifting during pregnancy and child's birth size in a large cohort study. 2014. 40:411-419 |
| **M. K. Campbell and M. F. Mottola.** Recreational exercise and occupational activity during pregnancy and birth weight: a case-control study. *American Journal of Obstetrics & Gynecology.* 2001. 184:403-408 |
| **M. K. Horan, C. A. McGowan, E. R. Gibney, J. Byrne, J. M. Donnelly and F. M. McAuliffe.** Maternal nutrition and glycaemic index during pregnancy impacts on offspring adiposity at 6 months of age-analysis from the ROLO randomised controlled trial. *Nutrients.* 2016. 8: |
| **M. K. Horan, C. A. McGowan, E. R. Gibney, J. M. Donnelly and F. M. McAuliffe.** Maternal diet and weight at 3 months postpartum following a pregnancy intervention with a low glycaemic index diet: results from the ROLO randomised control trial. 2014. 6:2946-2955 |
| **M. K. Horan, C. A. McGowan, J. Donnelly, E. Gibney and F. M. McAuliffe.** Maternal diet and weight at 3 months partum following a pregnancy intervention with a low glycaemic index diet: Results from the ROLO randomised control trial. *Archives of Disease in Childhood: Fetal and Neonatal Edition.* 2014. 99: |
| **M. K. Horan, C. A. McGowan, O. Doyle and F. M. McAuliffe.** Well-being in pregnancy: an examination of the effect of socioeconomic, dietary and lifestyle factors including impact of a low glycaemic index dietary intervention. *Eur.J.Clin.Nutr.* 2014. 68:19-24 |
| **M. K. Horan, C. A. McGowan, O. Doyle and F. M. McAuliffe.** Well-being in pregnancy: an examination of the effect of socioeconomic, dietary and lifestyle factors including impact of a low glycaemic index dietary intervention. 2014. 68:19-24 |
| **M. Kamali, E. Jafari and S. Mazloom Zadeh.** The effect of 'sitting pelvic tilt exercise' on low back pain and sleep disorder in primigravidas during the third trimester. *Qom University of Medical Sciences Journal.* 2009. 3:7-7 1p |
| **M. Kashanian, Z. Akbari and M. H. Alizadeh.** The effect of exercise on back pain and lordosis in pregnant women. *International Journal of Gynecology and Obstetrics.* 2009. 107:160-161 |
| **M. Koushkie Jahromi, B. Namavar Jahromi and S. Hojjati.** PMC3407581; Relationship between Daily Physical Activity During Last Month of Pregnancy and Pregnancy Outcome. *Iranian Red Crescent Medical Journal.* 2011. 13:15-20 |
| **M. Kucuk and F. Doymaz.** Placental weight and placental weight-to-birth weight ratio are increased in diet- and exercise-treated gestational diabetes mellitus subjects but not in subjects with one abnormal value on 100-g oral glucose tolerance test. *Journal of Diabetes & its Complications.* 2009. 23:25-31 |
| **M. Kusaka, M. Matsuzaki, M. Shiraishi and M. Haruna.** Immediate stress reduction effects of yoga during pregnancy: One group pre-post test. *Women & Birth: Journal of the Australian College of Midwives.* 2016. 16:16 |
| **M. Kusaka, M. Matsuzaki, M. Shiraishi and M. Haruna.** Immediate stress reduction effects of yoga during pregnancy: One group pre-post test. *Women & Birth: Journal of the Australian College of Midwives.* 2016. 16:16 |
| **M. L. Bovbjerg and A. Siega-Riz.** NIHMS384329 PMC3478876; Exercise during pregnancy and cesarean delivery: North Carolina PRAMS, 2004-2005. *Birth.* 2009. 36:200-207 |
| **M. L. Bovbjerg, A. M. Siega-Riz, K. R. Evenson and W. Goodnight.** Exposure analysis methods impact associations between maternal physical activity and cesarean delivery. 2015. 12:37-47 |
| **M. L. Gau, C. Y. Chang, S. H. Tian and K. C. Lin.** Effects of birth ball exercise on pain and self-efficacy during childbirth: a randomised controlled trial in Taiwan. 2011. 27:e293-300 |
| **M. L. Middlekauff, M. J. Egger, I. Nygaard and J. M. Shaw.** The impact of acute and chronic strenuous exercise on pelvic floor muscle strength and support in nulliparous healthy women. *Female Pelvic Medicine and Reconstructive Surgery.* 2015. 1):S15 |
| **M. L. Osterdal, M. Strom, A. K. Klemmensen, et al.** Does leisure time physical activity in early pregnancy protect against pre-eclampsia? Prospective cohort in Danish women. 2009. 116:98-107 |
| **M. L. Pernoll, J. Metcalfe, P. A. Kovach, R. Wachtel and M. J. Dunham.** Ventilation during rest and exercise in pregnancy and postpartum. 1975. 25:295-310 |
| **M. L. Pernoll, J. Metcalfe, T. L. Schlenker, J. E. Welch and J. A. Matsumoto.** Oxygen consumption at rest and during exercise in pregnancy. 1975. 25:285-293 |
| **M. L. Ree, I. Nygaard and K. Bø.** Muscular fatigue in the pelvic floor muscles after strenuous physical activity. *Acta Obstet.Gynecol.Scand.* 2007. 86:870-876 |
| **M. L. Ruebel, K. Shankar, T. Badger and A. Andres.** Differences in resting metabolic rate and physical activity patterns in lean and overweight/obese pregnant women. *FASEB Journal.* 2012. 26: |
| **M. Latka, J. Kline and M. Hatch.** Exercise and spontaneous abortion of known karyotype. *Epidemiology.* 1999. 10:73-75 |
| **M. Latka, J. Kline and M. Hatch.** Exercise and spontaneous abortion of known karyotype. 1999. 10:73-75 |
| **M. Lawrence and R. G. Whitehead.** Physical activity and total energy expenditure of child-bearing Gambian village women. *Eur.J.Clin.Nutr.* 1988. 42:145-160 |
| **M. Leppanen, M. Aittasalo, J. Raitanen, T. I. Kinnunen, U. M. Kujala and R. Luoto.** Physical activity during pregnancy: predictors of change, perceived support and barriers among women at increased risk of gestational diabetes. 2014. 18:2158-2166 |
| **M. Lima, S. Ismail, A. Ashworth and S. S. Morris.** Influence of heavy agricultural work during pregnancy on birthweight in Northeast Brazil. *Int.J.Epidemiol.* 1999. 28:469-474 |
| **M. Lima, S. Ismail, A. Ashworth and S. S. Morris.** Influence of heavy agricultural work during pregnancy on birthweight in Northeast Brazil. 1999. 28:469-474 |
| **M. Lindqvist, M. Lindkvist, E. Eurenius, M. Persson, A. Ivarsson and I. Mogren.** Leisure time physical activity among pregnant women and its associations with maternal characteristics and pregnancy outcomes. *Sexual and Reproductive Healthcare.* 2016. 9:14-20 |
| **M. Lindqvist, M. Lindkvist, E. Eurenius, M. Persson, A. Ivarsson and I. Mogren.** Leisure time physical activity among pregnant women and its associations with maternal characteristics and pregnancy outcomes. *Sexual and Reproductive Healthcare.* 2016. 9:14-20 |
| **M. Lindqvist, M. Lindkvist, E. Eurenius, M. Persson, A. Ivarsson and I. Mogren.** Leisure time physical activity among pregnant women and its associations with maternal characteristics and pregnancy outcomes. *Sexual & reproductive healthcare : official journal of the Swedish Association of Midwives.* 2016. 9:14-20 |
| **M. Lof and E. Forsum.** Activity pattern and energy expenditure due to physical activity before and during pregnancey in healthy Swedish women. *Br.J.Nutr.* 2006. 95:296-302 |
| **M. Lof and E. Forsum.** Activity pattern and energy expenditure due to physical activity before and during pregnancy in healthy Swedish women. 2006. 95:296-302 |
| **M. Lof, L. Hilakivi-Clarke, S. Sandin and E. Weiderpass.** Effects of pre-pregnancy physical activity and maternal BMI on gestational weight gain and birth weight. *Acta Obstet.Gynecol.Scand.* 2008. 87:524-530 |
| **M. Lof.** Physical activity pattern and activity energy expenditure in healthy pregnant and non-pregnant Swedish women. 2011. 65:1295-1301 |
| **M. Luaces Mendez, R. Barakat, R. Montejo-Rodriguez and M. Perales-Santaella.** Effects of physical exercise on cardiovascular status and ventricular mechanics during pregnancy: A casecontrol study. *Eur.Heart J.* 2011. 32:1026 |
| **M. M. Demment, M. L. Graham and C. M. Olson.** How an online intervention to prevent excessive gestational weight gain is used and by whom: a randomized controlled process evaluation. 2014. 16:e194 |
| **M. M. Kennelly, M. Geary, N. McCaffrey, P. McLoughlin, A. Staines and P. McKenna.** Exercise-related changes in umbilical and uterine artery waveforms as assessed by Doppler ultrasound scans. *American Journal of Obstetrics & Gynecology.* 2002. 187:661-666 |
| **M. M. Kennelly, N. McCaffrey, P. McLoughlin, S. Lyons and P. McKenna.** Fetal heart rate response to strenuous maternal exercise: not a predictor of fetal distress. *American Journal of Obstetrics & Gynecology.* 2002. 187:811-816 |
| **M. M. Lawani, E. Alihonou, B. Akplogan, G. Poumarat, L. Okou and N. Adjadi.** Effect of antenatal gymnastics on childbirth: a study on 50 sedentary women in the Republic of Benin during the second and third quarters of pregnancy]. *Sante.* 2003. 13:235-241 |
| **M. M. Okido, F. L. Valeri, W. P. Martins, C. H. Ferreira, G. Duarte and R. C. Cavalli.** Assessment of foetal wellbeing in pregnant women subjected to pelvic floor muscle training: a controlled randomised study. *International Urogynecology Journal.* 2015. 26:1475-1481 |
| **M. M. Shangold.** Exercise-induced changes in uterine artery blood flow, as measured by Doppler ultrasound, in pregnant subjects. 1988. 5:187-188 |
| **M. M. van Poppel, L. De Wit, J. Jelsma, A. Bogaerts and F. J. Snock.** Physical activity and mental health in obese pregnant women: results from dali study. *Int.J.Behav.Med.* 2014. 21:S146 |
| **M. Madsen, T. Jorgensen, M. L. Jensen, et al.** Leisure time physical exercise during pregnancy and the risk of miscarriage: A study within the Danish National Birth Cohort. *BJOG: An International Journal of Obstetrics and Gynaecology.* 2007. 114:1419-1426 |
| **M. Madsen, T. Jorgensen, M. L. Jensen, et al.** Leisure time physical exercise during pregnancy and the risk of miscarriage: A study within the Danish National Birth Cohort. *J.Reprod.Immunol.* 2011. 90 (2):156-157 |
| **M. Madsen, T. Jørgensen, M. L. Jensen, et al.** Leisure time physical exercise during pregnancy and the risk of miscarriage: A study within the Danish National Birth Cohort. 2007. 114:1419-1426 |
| **M. Makara-Studzinskct, K. Kry-Noszczyk, M. Starczynska, A. Sieron and Z. Sliwinski.** Types of physical activity during pregnancy. 2013. 20:19-24 |
| **M. Moffatt and M. Flynn.** Prevention of pregnancy-related lumbopelvic pain, using a single exercise and advice-based physiotherapy intervention in early pregnancy: A pilot study. 2014. 35:41-48 |
| **M. Muzik, S. E. Hamilton, K. Lisa Rosenblum, E. Waxler and Z. Hadi.** Mindfulness yoga during pregnancy for psychiatrically at-risk women: preliminary results from a pilot feasibility study. *Complementary Therapies in Clinical Practice.* 2012. 18:235-240 |
| **M. Muzik, S. E. Hamilton, K. Lisa Rosenblum, E. Waxler and Z. Hadi.** Mindfulness yoga during pregnancy for psychiatrically at-risk women: preliminary results from a pilot feasibility study. 2012. 18:235-240 |
| **M. N. van Poppel, M. Peinhaupt, M. E. Eekhoff, et al.** Physical activity in overweight and obese pregnant women is associated with higher levels of proinflammatory cytokines and with reduced insulin response through interleukin-6. *Diabetes Care.* 2014. 37:1132-1139 |
| **M. N. van Poppel, M. Peinhaupt, M. E. Eekhoff, et al.** Physical activity in overweight and obese pregnant women is associated with higher levels of proinflammatory cytokines and with reduced insulin response through interleukin-6. 2014. 37:1132-1139 |
| **M. N. van Poppel, N. Oostdam, M. E. Eekhoff, M. G. Wouters, W. van Mechelen and P. M. Catalano.** Longitudinal relationship of physical activity with insulin sensitivity in overweight and obese pregnant women. *Journal of Clinical Endocrinology & Metabolism.* 2013. 98:2929-2935 |
| **M. N. van Poppel, N. Oostdam, M. E. Eekhoff, M. G. Wouters, W. van Mechelen and P. M. Catalano.** Longitudinal relationship of physical activity with insulin sensitivity in overweight and obese pregnant women. 2013. 98:2929-2935 |
| **M. Nayak, M. E. Eekhoff, M. Peinhaupt, A. Heinemann, G. Desoye and M. N. van Poppel.** Cytokines and their association with insulin resistance in obese pregnant women with different levels of physical activity. 2016. 77:72-78 |
| **M. Pelaez, S. Gonzalez-Cerron, R. Montejo and R. Barakat.** Pelvic floor muscle training included in a pregnancy exercise program is effective in primary prevention of urinary incontinence: a randomized controlled trial. 2014. 33:67-71 |
| **M. Peoples-Sheps, E. Siegel, C. M. Suchindran, H. Origasa, A. Ware and A. Barakat.** PMC1405728; Characteristics of maternal employment during pregnancy: effects on low birthweight. *Am.J.Public Health.* 1991. 81:1007-1012 |
| **M. Perales, A. Santos-Lozano, F. Sanchis-Gomar, et al.** Maternal Cardiac Adaptations to a Physical Exercise Program during Pregnancy. *Medicine & Science in Sports & Exercise.* 2016. 48:896-906 |
| **M. Perales, I. Calabria, C. Lopez, E. Franco, J. Coteron and R. Barakat.** Regular Exercise Throughout Pregnancy Is Associated With a Shorter First Stage of Labor. *American Journal of Health Promotion.* 2016. 30:149-154 |
| **M. Perales, M. Luaces, M. I. Barriopedro, R. Montejo and R. Barakat.** Effects of a supervised exercise program on cardiac structure during pregnancy. Randomized clinical trial. Spanish]. *Progresos de Obstetricia y Ginecologia.* 2012. 55:209-215 |
| **M. Perales, M. Luaces, M. I. Barriopedro, R. Montejo and R. Barakat.** Effects of a supervised exercise program on cardiac structure during pregnancy. Randomized clinical trial. [Spanish]. 2012. 55:209-215 |
| **M. Perales, S. Mateos, M. Vargas, I. Sanz, A. Lucia and R. Barakat.** Fetal and maternal heart rate responses to exercise in pregnant women. A randomized controlled trial. *Archivos de Medicina del Deporte.* 2015. 32:361-367 |
| **M. Perales, Y. Cordero, M. Vargas, A. Lucia and R. Barakat.** Exercise and depression in overweight and obese pregnant women: A randomised controlled trial. *Archivos de Medicina del Deporte.* 2015. 32:156-163 |
| **M. Persson, A. Winkvist and I. Mogren.** PMC4372034; Lifestyle and health status in a sample of Swedish women four years after pregnancy: a comparison of women with a history of normal pregnancy and women with a history of gestational diabetes mellitus. *BMC Pregnancy & Childbirth.* 2015. 15:57 |
| **M. R. Domingues and A. J. Barros.** Leisure-time physical activity during pregnancy in the 2004 Pelotas Birth Cohort Study.[Erratum appears in Rev Saude Publica. 2007 Jun;41(3):493]. 2007. 41:173-180 |
| **M. R. Domingues, A. J. Barros and A. Matijasevich.** Leisure time physical activity during pregnancy and preterm birth in Brazil. *International Journal of Gynaecology & Obstetrics.* 2008. 103:9-15 |
| **M. R. Domingues, A. Matijasevich, A. J. Barros, I. S. Santos, B. L. Horta and P. C. Hallal.** PMC4211660; Physical activity during pregnancy and offspring neurodevelopment and IQ in the first 4 years of life. *PLoS ONE Electronic Resource].* 2014. 9:e110050 |
| **M. R. Domingues, A. Matijasevich, A. J. Barros, I. S. Santos, B. L. Horta and P. C. Hallal.** Physical activity during pregnancy and offspring neurodevelopment and IQ in the first 4 years of life. 2014. 9:e110050 |
| **M. R. Jackson, P. Gott, S. J. Lye, J. W. Ritchie and J. F. Clapp 3.** The effects of maternal aerobic exercise on human placental development: placental volumetric composition and surface areas. *Placenta.* 1995. 16:179-191 |
| **M. R. Marshall and J. M. Pivarnik.** Perceived Exertion of Physical Activity During Pregnancy. 2015. 12:1039-1043 |
| **M. Rosediani, N. H. Nik Rosmawati, M. Juliawati and D. Norwati.** Knowledge, attitude and practice towards pelvic floor muscle exercise among pregnant women attending antenatal clinic in Universiti Sains Malaysia Hospital, Malaysia. 2012. 19:37-38 |
| **M. S. Maturi, P. Afshary and P. Abedi.** Effect of physical activity intervention based on a pedometer on physical activity level and anthropometric measures after childbirth: A randomized controlled trial. *BMC Pregnancy and Childbirth.* 2011. 11: |
| **M. S. Poudevigne and P. J. O'Connor.** Physical activity and mood during pregnancy. *Med.Sci.Sports Exerc.* 2005. 37:1374-1380 |
| **M. S. Poudevigne and P. J. O'Connor.** Physical activity and mood during pregnancy. 2005. 37:1374-1380 |
| **M. S. Rogers and B. Tomlinson.** Change in cardiovascular indices with position and isometric exercise throughout pregnancy: Assessment by impedance cardiography and oscillometric sphygmomanometry. *Hypertension in Pregnancy.* 1998. 17:191-202 |
| **M. S. Rogers and C. Hung.** Change in mean arterial pressure following isometric exercise in normotensive and hypertensive pregnancy: Validation of a continuous blood pressure monitor. 1996. 15:211-218 |
| **M. S. Treuth, N. F. Butte and M. Puyau.** Pregnancy-related changes in physical activity, fitness, and strength. *Med.Sci.Sports Exerc.* 2005. 37:832-837 |
| **M. S. Treuth, N. F. Butte and M. Puyau.** Pregnancy-related changes in physical activity, fitness, and strength. 2005. 37:832-837 |
| **M. S. Wingate, S. Swaminathan and G. R. Alexander.** The influence of maternal mobility on birth outcomes of non-hispanic blacks. *Maternal & Child Health Journal.* 2009. 13:48-55 |
| **M. San Juan Dertkigil, J. G. Cecatti, M. A. Sarno, S. R. Cavalcante and E. F. Marussi.** Variation in the amniotic fluid index following moderate physical activity in water during pregnancy. 2007. 86:547-552 |
| **M. Satyapriya, H. R. Nagendra, R. Nagarathna and V. Padmalatha.** Effect of integrated yoga on stress and heart rate variability in pregnant women. *International Journal of Gynecology and Obstetrics.* 2009. 104:218-222 |
| **M. Satyapriya, H. R. Nagendra, R. Nagarathna and V. Padmalatha.** Effect of integrated yoga on stress and heart rate variability in pregnant women. 2009. 104:218-222 |
| **M. Satyapriya, R. Nagarathna, V. Padmalatha and H. R. Nagendra.** Effect of integrated yoga on anxiety, depression & well being in normal pregnancy. 2013. 19:230-236 |
| **M. Saurel-Cubizolles, D. Subtil and M. Kaminski.** PMC1060698; Is preterm delivery still related to physical working conditions in pregnancy?. *Journal of Epidemiology & Community Health.* 1991. 45:29-34 |
| **M. Saurel-Cubizolles, M. Kaminski, C. Du Mazaubrun, J. Llado and M. Estryn-Behar.** High blood pressure during pregnancy and working conditions among hospital personnel. *European Journal of Obstetrics, Gynecology, & Reproductive Biology.* 1991. 40:29-34 |
| **M. Shafiee and M. Rostami.** Comparison between the effect of lumbopelvic belt and home based pelvic stabilizing exercise on pregnant women with pelvic girdle pain; A randomized controlled trial. *Eur.J.Med.Res.* 2011. 16:35 |
| **M. Sillero-Quintana, E. Conde-Pascual, P. Gomez-Carmona, I. Fernandez-Cuevas and T. Garcia-Pastor.** Effect of yoga and swimming on body temperature of pregnant women. *Thermology International.* 2012. 22 (3):108 |
| **M. Sillero-Quintana, E. Conde-Pascual, P. Gomez-Carmona, I. Fernandez-Cuevas and T. Garcia-Pastor.** Effect of Yoga and Swimming on body temperature of pregnant women. *Thermology International.* 2012. 22:143-149 |
| **M. Skreden, N. C. Overby, L. R. Sagedal, et al.** Changes in mode of transportation to work or school from pre-pregnancy to early pregnancy in the Norwegian Fit for Delivery study. *Preventive Medicine Reports.* 2015. 2:429-435 |
| **M. Skreden, N. C. Overby, L. R. Sagedal, et al.** PMC4730776; Change in active transportation and weight gain in pregnancy. *International Journal of Behavioral Nutrition & Physical Activity.* 2016. 13:10 |
| **M. Slater, L. Spector, A. Linabery, C. Blair and J. Ross.** Physical activity during early pregnancy and infant birth size. *Am.J.Epidemiol.* 2012. 175:S24 |
| **M. St Leger Dowse, A. Gunby, R. Moncad, C. Fife and P. Bryson.** Scuba diving and pregnancy: can we determine safe limits?. 2006. 26:509-513 |
| **M. Strom, E. L. Mortensen, T. I. Halldorson, M. L. Osterdal and S. F. Olsen.** Leisure-time physical activity in pregnancy and risk of postpartum depression: a prospective study in a large national birth cohort. 2009. 70:1707-1714 |
| **M. Tanvig, C. A. Vinter, J. S. Jorgensen, et al.** Effects of lifestyle intervention in pregnancy and anthropometrics at birth on offspring metabolic profile at 2.8 years: results from the Lifestyle in Pregnancy and Offspring (LiPO) study. *Journal of Clinical Endocrinology & Metabolism.* 2015. 100:175-183 |
| **M. Tanvig, C. A. Vinter, J. S. Jorgensen, et al.** Effects of lifestyle intervention in pregnancy and anthropometrics at birth on offspring metabolic profile at 2.8 years: Results from the lifestyle in pregnancy and offspring (LiPo) study. 2015. 175-183 |
| **M. Teychenne, G. Abbott, der Pligt van, et al.** Associations between physical activity, television viewing and postnatal depressive symptoms amongst healthy primiparous mothers. *Mental Health and Physical Activity.* 2016. 10:62-67 |
| **M. Ussher, P. Aveyard, T. Coleman, et al.** Physical activity as an aid to smoking cessation during pregnancy: two feasibility studies. 2008. 8:328 |
| **M. Ussher, S. Lewis, P. Aveyard, et al.** Physical activity for smoking cessation in pregnancy: randomised controlled trial. 2015. 350:h2145 |
| **M. Ussher, S. Lewis, P. Aveyard, et al.** The London Exercise And Pregnant smokers (LEAP) trial: a randomised controlled trial of physical activity for smoking cessation in pregnancy with an economic evaluation. 2015. 19:1-136 |
| **M. V. Auerbach, M. Lobel and D. T. Cannella.** Psychosocial correlates of health-promoting and health-impairing behaviors in pregnancy. 2014. 35:76-83 |
| **M. V. Bobic, D. Habek and J. C. Habek.** Perinatal epidemiological risk factors for preeclampsia. 2015. 54:9-13 |
| **M. Van Melick.** Working conditions and preterm birth in multiple pregnancies. *Obstet.Gynecol.* 2012. 206:S230 |
| **M. Van Poppel, N. Oostdam, M. Eekhoff and W. Van Mechelen.** Physical activity and maternal glucose and insulin in pregnant overweight and obese women. *Journal of Science and Medicine in Sport.* 2012. 15:S340 |
| **M. Varner.** Do subsequent pregnancies following the diagnosis of mild gestational diabetes increase the risk of maternal cardiometabolic disorders?. *Obstet.Gynecol.* 2016. 214:S169 |
| **M. W. Blackburn and D. H. Calloway.** Heart rate and energy expenditure of pregnant and lactating women. 1985. 42:1161-1169 |
| **M. W. Carpenter, S. P. Sady, B. Hoegsberg, et al.** Fetal heart rate response to maternal exertion. *JAMA.* 1988. 259:3006-3009 |
| **M. W. Carpenter, S. P. Sady, B. Hoegsberg, et al.** Fetal heart rate response to maternal exertion. *J.Am.Med.Assoc.* 1988. 259:3006-3009 |
| **M. W. Carpenter, S. P. Sady, M. A. Sady, B. Haydon, D. R. Coustan and P. D. Thompson.** Effect of maternal weight gain during pregnancy on exercise performance. 1990. 68:1173-1176 |
| **M. W. Chang, S. Nitzke, D. Buist, D. Cain, S. Horning and K. Eghtedary.** I am pregnant and want to do better but i can't: focus groups with low-income overweight and obese pregnant women. 2015. 19:1060-1070 |
| **M. Xiang, M. Konishi, H. Hu, et al.** Reliability and Validity of a Chinese-Translated Version of a Pregnancy Physical Activity Questionnaire. *Maternal & Child Health Journal.* 2016. 25:25 |
| **M. Y. Takito and M. H. D. A. Benicio.** Physical activity during pregnancy and fetal outcomes: A case-control study. Portuguese]. *Rev.Saude Publica.* 2010. 44:90-101 |
| **M. Zeanah and S. P. Schlosser.** Adherence to ACOG guidelines on exercise during pregnancy: effect on pregnancy outcome. *JOGNN - Journal of Obstetric, Gynecologic, & Neonatal Nursing.* 1993. 22:329-335 |
| **Marci Lobel, Dolores Lacey Cannella, Jennifer E. Graham, Carla DeVincent, Jayne Schneider and Bruce A. Meyer.** Pregnancy-specific stress, prenatal health behaviors, and birth outcomes. *Health Psychology.* 2008. 27:604-615 |
| **Marci Lobel, Dolores Lacey Cannella, Jennifer E. Graham, Carla DeVincent, Jayne Schneider and Bruce A. Meyer.** Pregnancy-specific stress, prenatal health behaviors, and birth outcomes. 2008. 27:604-615 |
| **Marci Lobel, Dolores Lacey Cannella, Jennifer E. Graham, Carla DeVincent, Jayne Schneider and Bruce A. Meyer.** Pregnancy-Specific Stress, Prenatal Health Behaviors, and Birth Outcomes. *Health Psychology.* 2008. 27:604-615 |
| **Maria Zamora-Flyr.** Predictors of intention and performance of physical activity of pregnant Hispanic women. *Dissertation Abstracts International: Section B: The Sciences and Engineering.* 2011. 71:6077 |
| **Marianne Skreden, Nina C. Overby, Linda R. Sagedal, et al.** Change in active transportation and weight gain in pregnancy. *The International Journal of Behavioral Nutrition and Physical Activity Vol 13 2016, ArtID 10.* 2016. 13: |
| **Marushka Silveira, Penelope Pekow, Nancy Dole, Glenn Markenson and Lisa Chasan-Taber.** Correlates of High Perceived Stress Among Pregnant Hispanic Women in Western Massachusetts. 2013. 17:1138-1150 13 |
| **Miguel A. Diego, John N. Dieter, Tiffany Field, et al.** Fetal activity following stimulation of the mother's abdomen, feet and hands. *Dev.Psychobiol.* 2002. 41:396-406 |
| **Monika Guszkowska.** Physical activity in relation to affective states and labor anxiety in pregnant women. 2011. 15:114-118 |
| **N. A. Mohd-Shukri, A. Duncan, F. C. Denison, et al.** Health Behaviours during Pregnancy in Women with Very Severe Obesity. 2015. 7:8431-8443 |
| **N. Al-Azemi, M. F. Diejomaoh, E. Angelaki and A. T. Mohammed.** Clinical presentation and management of diabetes mellitus in pregnancy. 2014. 6: |
| **N. Barbari, L. May, E. Newton and J. Livingston.** Influence of exercise in pregnancy on fetal heart response during labor and delivery. *FASEB Journal.* 2014. 1): |
| **N. Boscaglia, H. Skouteris and E. H. Wertheim.** Changes in body image satisfaction during pregnancy: a comparison of high exercising and low exercising women. 2003. 43:41-45 |
| **N. C. Harvey, J. R. Poole, M. K. Javaid, et al.** Parental determinants of neonatal body composition. 2007. 92:523-526 |
| **N. C. Harvey, J. R. Poole, M. K. Javaid, et al.** PMC2080689 UKMS1164; Parental determinants of neonatal body composition. *Journal of Clinical Endocrinology & Metabolism.* 2007. 92:523-526 |
| **N. C. Harvey, M. K. Javaid, N. K. Arden, et al.** EMS28000 PMC3672833; Maternal predictors of neonatal bone size and geometry: the Southampton Women's Survey. *Journal of Developmental Origins of Health and Disease.* 2010. 1:35-41 |
| **N. C. Harvey, M. K. Javaid, N. K. Arden, et al.** Maternal predictors of neonatal bone size and geometry: the Southampton Women's Survey. 2010. 1:35-41 |
| **N. C. Nguyen, K. R. Evenson, D. A. Savitz, H. Chu, J. M. Thorp and J. L. Daniels.** NIHMS384562 PMC3459289; Physical activity and maternal-fetal circulation measured by Doppler ultrasound. *Journal of Perinatology.* 2013. 33:87-93 |
| **N. C. Rose, J. E. Haddow, G. E. Palomaki and G. J. Knight.** Self-rated physical activity level during the second trimester and pregnancy outcome. *Obstetrics & Gynecology.* 1991. 78:1078-1080 |
| **N. Cherry.** Physical demands of work and health complaints among women working late in pregnancy. *Ergonomics.* 1987. 30:689-701 |
| **N. D. Avery, K. D. Stocking, J. E. Tranmer, G. A. Davies and L. A. Wolfe.** Fetal responses to maternal strength conditioning exercises in late gestation. *Canadian Journal of Applied Physiology.* 1999. 24:362-376 |
| **N. D. Avery, L. A. Wolfe, C. E. Amara, G. A. Davies and M. J. McGrath.** Effects of human pregnancy on cardiac autonomic function above and below the ventilatory threshold. *J.Appl.Physiol.* 2001. 90:321-328 |
| **N. D. Avery, L. A. Wolfe, C. E. Amara, G. A. Davies and M. J. McGrath.** Effects of human pregnancy on cardiac autonomic function above and below the ventilatory threshold. 2001. 90:321-328 |
| **N. Daly, C. Mitchell, M. Farren, M. M. Kennelly, J. Hussey and M. J. Turner.** Maternal obesity and physical activity and exercise levels as pregnancy advances: an observational study. 2015. |
| **N. de Keyser, A. Josefsson, W. G. Monfils, et al.** Total cost comparison of standard antenatal care with a weight gain restriction programme for obese pregnant women. 2011. 125:311-317 |
| **N. H. Hjollund, T. K. Jensen, J. P. Bonde, et al.** Spontaneous abortion and physical strain around implantation: a follow-up study of first-pregnancy planners. 2000. 11:18-23 |
| **N. Hatoum, J. F. Clapp 3, M. R. Newman, N. Dajani and S. B. Amini.** Effects of maternal exercise on fetal activity in late gestation. *J.Matern.Fetal.* 1997. 6:134-139 |
| **N. Hatoum, J. F. Clapp 3rd, M. R. Newman, N. Dajani and S. B. Amini.** Effects of maternal exercise on fetal activity in late gestation. 1997. 6:134-139 |
| **N. J. Secher.** The Treatment of Obese Pregnant Women (TOP) study: a randomized controlled trial of the effect of physical activity intervention assessed by pedometer with or without dietary intervention in obese pregnant women. *Obstet.Gynecol.* 2014. 210:134.e1-134.e9 |
| **N. Khodiguian, S. V. Jaque-Fortunato, R. A. Wiswell and R. Artal.** A comparison of cross-sectional and longitudinal methods of assessing the influence of pregnancy on cardiac function during exercise. 1996. 20:232-241 |
| **N. M. Evensen, A. Kvale and I. H. Braekken.** Convergent validity of the Timed Up and Go Test and Ten-metre Timed Walk Test in pregnant women with pelvic girdle pain. *Man.Ther.* 2016. 21:94-99 |
| **N. M. Rafla and G. A. Etokowo.** The effect of maternal exercise on uterine artery velocimetry waveforms. *Journal of Obstetrics and Gynaecology.* 1998. 18:14-17 |
| **N. M. Rafla and J. M. Beazely.** The effect of maternal exercise on fetal umbilical artery waveforms. *European Journal of Obstetrics, Gynecology, & Reproductive Biology.* 1991. 40:119-122 |
| **N. M. Rafla and J. R. Cook.** The effect of maternal exercise on fetal heart rate. *Journal of Obstetrics & Gynaecology.* 1999. 19:381-384 |
| **N. M. Rafla and N. L. Whitelaw.** The effect of maternal exercise on fetal aortic blood flow. *Journal of Obstetrics and Gynaecology.* 1996. 16:342-346 |
| **N. M. Rafla and N. L. Whitelaw.** The effect of maternal exercise on fetal aortic blood flow. 1996. 16:342-346 |
| **N. M. Rafla.** The effect of maternal exercise on umbilical artery blood flow in insulin-dependent diabetics. *Journal of Obstetrics & Gynaecology.* 2000. 20:606-609 |
| **N. M. Rafla.** Umbilical artery flow velocity waveforms following maternal exercise. *Journal of Obstetrics and Gynaecology.* 1999. 19:385-389 |
| **N. Mamelle, I. Bertucat and F. Munoz.** Pregnant women at work: rest periods to prevent preterm birth?. *Paediatr.Perinat.Epidemiol.* 1989. 3:19-28 |
| **N. Mamelle, I. Bertucat and F. Munoz.** Pregnant women at work: rest periods to prevent preterm birth?. 1989. 3:19-28 |
| **N. Morris, S. B. Osborn, H. Payling Wright and A. Hart.** Effective uterine blood-flow during exercise in normal and pre-eclamptic pregnancies. *The Lancet.* 1956. 268:481-484 |
| **N. Morris, S. B. Osborn, H. Payling Wright and A. Hart.** Effective uterine blood-flow during exercise in normal and pre-eclamptic pregnancies. 1956. 268:481-484 |
| **N. N. de Alcantara, S. H. O. Jardim, D. F. M. Vitorino and V. P. de Lima.** Influence of hydrotherapy in cardiorespiratory parameters during pregnancy. *Revista Neurociencias.* 2012. 20:372-378 |
| **N. N. de Alcantara, S. H. O. Jardim, D. F. M. Vitorino and V. P. de Lima.** Influence of hydrotherapy in cardiorespiratory parameters during pregnancy. 2012. 20:372-378 |
| **N. Nelson, S. Jenkins, C. Lessard-Anderson and K. Borowski.** Exercise habits during pregnancy and correlation with weight gain and obstetric outcomes. *Obstet.Gynecol.* 2016. 127:153S |
| **N. Oostdam, J. Bosmans, M. G. Wouters, E. M. Eekhoff, W. van Mechelen and M. N. van Poppel.** Cost-effectiveness of an exercise program during pregnancy to prevent gestational diabetes: results of an economic evaluation alongside a randomised controlled trial. 2012. 12:64 |
| **N. Oostdam, van Poppel, M. N. M., Mgaj Wouters, et al.** No effect of the FitFor2 exercise programme on blood glucose, insulin sensitivity, and birthweight in pregnant women who were overweight and at risk for gestational diabetes: results of a randomised controlled trial. *Bjog-an International Journal of Obstetrics and Gynaecology.* 2012. 119:1098-1107 |
| **N. P. Joshi, S. R. Kulkarni, C. S. Yajnik, et al.** Increasing maternal parity predicts neonatal adiposity: Pune Maternal Nutrition Study. 2005. 193:783-789 |
| **N. Padmapriya, L. Shen, S. E. Soh, et al.** Physical Activity and Sedentary Behavior Patterns Before and During Pregnancy in a Multi-ethnic Sample of Asian Women in Singapore. *Matern.Child Health J.* 2015. 19:2523-2535 |
| **N. Padmapriya, L. Shen, S. E. Soh, et al.** Physical Activity and Sedentary Behavior Patterns Before and During Pregnancy in a Multi-ethnic Sample of Asian Women in Singapore. 2015. 19:2523-2535 |
| **N. Prabhu.** Effect of a exercise by pregnant women and birth weight: a randomized controlled trial. *Journal of Evolution of Medical and Dental Sciences-Jemds.* 2015. 4:1509-1516 |
| **N. Tafari, R. L. Naeye and A. Gobezie.** Effects of maternal undernutrition and heavy physical work during pregnancy on birth weight. *British Journal of Obstetrics & Gynaecology.* 1980. 87:222-226 |
| **N. Tafari, R. L. Naeye and A. Gobezie.** Effects of maternal undernutrition and heavy physical work during pregnancy on birth weight. 1980. 87:222-226 |
| **N. Voldner, K. F. Froslie, K. Bo, et al.** Modifiable determinants of fetal macrosomia: role of lifestyle-related factors. *Acta Obstet.Gynecol.Scand.* 2008. 87:423-429 |
| **N. Voldner, K. F. Froslie, L. A. Haakstad, K. Bo and T. Henriksen.** Birth complications, overweight, and physical inactivity. 2009. 88:550-555 |
| **Nct, R. Barakat and M. Perales.** Effect of a Supervised Exercise Program During Whole Pregnancy on Outcomes and Level of Depression. A Randomized Controlled Trial. 2009. |
| **O. Kgosidialwa, A. M. Egan, L. Carmody, B. Kirwan, P. Gunning and F. P. Dunne.** Treatment With Diet and Exercise for Women With Gestational Diabetes Mellitus Diagnosed Using IADPSG Criteria. 2015. 100:4629-4636 |
| **O. M. Hellenes, T. Vik, G. C. Lohaugen, et al.** Regular moderate exercise during pregnancy does not have an adverse effect on the neurodevelopment of the child. *Acta Paediatrica.* 2015. 104:285-291 |
| **O. R. Anitha, S. Johncy and S. Y. Bondade.** Study of effect of exercise on PEFR in pregnant women. 2015. 5:89-92 |
| **O. Roldán, M. Perales, S. Mateos and R. Barakat.** Supervised physical activity during pregnancy improves fetal cardiac response. / el ejercicio físico supervisado durante el embarazo mejora la respuesta cardiaca fetal. *Revista Internacional de Medicina y Ciencias de la Actividad F.* 2015. 15:757-772 |
| **O. Taskin, J. M. Wheeler, A. I. Yalcinoglu and S. Coksenim.** The effects of episiotomy and Kegel exercises on postpartum pelvic relaxation: A prospective controlled study. 1996. 12:123-127 |
| **Olga S. Denda, Maria S. Denda, Anastasios X. Dalkiranis, Basiliki S. Lyssa and Mylonas Argyrios.** The effect of some dietary components on body weight and fat deposition in pregnant women in combination with exercise during pregnancy and postpartum period. 2005. 12:25-30 |
| **Oliveria Melo de, J. L. Silva, J. S. Tavares, V. O. Barros, D. F. Leite and M. M. Amorim.** Effect of a physical exercise program during pregnancy on uteroplacental and fetal blood flow and fetal growth: a randomized controlled trial. *Obstetrics & Gynecology.* 2012. 120:302-310 |
| **Oliveria Melo de, J. L. Silva, J. S. Tavares, V. O. Barros, D. F. Leite and M. M. Amorim.** Effect of a physical exercise program during pregnancy on uteroplacental and fetal blood flow and fetal growth: a randomized controlled trial. *Obstet.Gynecol.* 2012. 120:302-310 |
| **P. A. Nixon, L. K. Washburn, L. M. Mudd, et al.** Aerobic fitness and physical activity levels of children born prematurely following randomization to postnatal dexamethasone. *J.Pediatr.* 2011. 158:113-118 |
| **P. Abirami and A. Judie.** Integrated approach of yoga therapy on maternal and fetal outcome in gestational diabetes mellitus. *International Journal of Pharmaceutical and Clinical Research.* 2015. 7:377-382 |
| **P. Abirami and A. Judie.** Integrated approach of yoga therapy on maternal and fetal outcome in gestational diabetes mellitus. *International Journal of Pharmaceutical and Clinical Research.* 2015. 7:377-382 |
| **P. Abirami and A. Judie.** Reduction of risk on newly detected gestational diabetes mellitus by multi model intervention - A hospital based study. 2014. 6:370-374 |
| **P. Bahadoran and S. Mohamadirizi.** PMC4387656; Relationship between physical activity and quality of life in pregnant women. *Iranian Journal of Nursing and Midwifery Research.* 2015. 20:282-286 |
| **P. Bahadoran and S. Mohamadirizi.** PMC4946278; The study of physical activity and some relative factors in referred pregnant women to Isfahan Health-Care Centers and Shahid Beheshti Hospital. *Journal of Education & Health Promotion.* 2015. 4:100 |
| **P. Bahadoran and S. Mohamadirizi.** Relationship between physical activity and quality of life in pregnant women. 2015. 20:282-286 |
| **P. Bahadoran, F. Pouya, V. Zolaktaf and M. Taebi.** The effect of stretching exercise and walking on changes of blood pressure in nulliparous women. 2015. 20:205-210 |
| **P. Bergamaschi, E. Capodaglio and B. Fre.** Cardio-respiratory and metabolic aspects of muscular work in pregnancy. Italian]. *Minerva Ginecol.* 1964. 16:831-838 |
| **P. Bonnin, C. Bazzi-Grossin, N. Ciraru-Vigneron, et al.** Evidence of fetal cerebral vasodilatation induced by submaximal maternal dynamic exercise in human pregnancy. *J.Perinat.Med.* 1997. 25:63-70 |
| **P. Bung, C. Bung, R. Artal, N. Khodiguian, F. Fallenstein and L. Spatling.** Therapeutic exercise for insulin-requiring gestational diabetics: effects on the fetus--results of a randomized prospective longitudinal study. *J.Perinat.Med.* 1993. 21:125-137 |
| **P. C. Ko, C. C. Liang, S. D. Chang, J. T. Lee, A. S. Chao and P. J. Cheng.** A randomized controlled trial of antenatal pelvic floor exercises to prevent and treat urinary incontinence. 2011. 22:17-22 |
| **P. C. Santos, S. Abreu, C. Moreira, et al.** Impact of compliance with different guidelines on physical activity during pregnancy and perceived barriers to leisure physical activity. 2014. 32:1398-1408 |
| **P. C. Santos, S. Abreu, C. Moreira, et al.** PMC4884625; Physical Activity Patterns During Pregnancy in a Sample of Portuguese Women: A Longitudinal Prospective Study. *Iranian Red Crescent Medical Journal.* 2016. 18:e22455 |
| **P. D. Loprinzi, E. M. Fitzgerald and B. J. Cardinal.** Physical Activity and Depression Symptoms among Pregnant Women from the National Health and Nutrition Examination Survey 2005-2006. *JOGNN - Journal of Obstetric, Gynecologic, and Neonatal Nursing.* 2012. 41:227-235 |
| **P. D. Loprinzi, E. M. Fitzgerald and B. J. Cardinal.** Physical activity and depression symptoms among pregnant women from the National Health and Nutrition Examination Survey 2005-2006. 2012. 41:227-235 |
| **P. D. Loprinzi, E. M. Fitzgerald and B. J. Cardinal.** Physical Activity and Depression Symptoms among Pregnant Women from the National Health and Nutrition Examination Survey 2005-2006. *JOGNN - Journal of Obstetric, Gynecologic, and Neonatal Nursing.* 2012. 41:227-235 |
| **P. D. Loprinzi, E. M. Fitzgerald, E. Woekel and B. J. Cardinal.** Association of physical activity and sedentary behavior with biological markers among U.S. pregnant women. 2013. 22:953-958 |
| **P. D. Loprinzi, K. L. Loprinzi and B. J. Cardinal.** The relationship between physical activity and sleep among pregnant women. 2012. 5:22-27 |
| **P. Dwarkanath, S. Muthayya, M. Vaz, et al.** The relationship between maternal physical activity during pregnancy and birth weight. *Asia Pac.J.Clin.Nutr.* 2007. 16:704-710 |
| **P. E. Clarke and H. Gross.** Women's behaviour, beliefs and information sources about physical exercise in pregnancy. *Midwifery.* 2004. 20:133-141 |
| **P. E. Clarke and H. Gross.** Women's behaviour, beliefs and information sources about physical exercise in pregnancy. 2004. 20:133-141 |
| **P. E. Clarke, E. K. Rousham, H. Gross, A. W. Halligan and P. Bosio.** Activity patterns and time allocation during pregnancy: a longitudinal study of British women. 2005. 32:247-258 |
| **P. E. Watson and B. W. McDonald.** Activity levels in pregnant New Zealand women: relationship with socioeconomic factors, well-being, anthropometric measures, and birth outcome. *Applied Physiology, Nutrition, & Metabolism = Physiologie Appliquee, Nutrition et Metabolisme.* 2007. 32:733-742 |
| **P. Eisenberg de Smoler, C. Dominguez de Costa, R. Mejia de Cabrera and S. Karchmer.** [External fetal electrocardiography, the maternal effort test and the oxytocin challenge in cases of fetomaternal rhesus isoimmunisation (author's transl)]. 1979. 8:137-142 |
| **P. Ewings, S. Spencer, H. Marsh and M. O'Sullivan.** Obstetric risk factors for urinary incontinence and preventative pelvic floor exercises: cohort study and nested randomized controlled trial.Erratum appears in J Obstet Gynaecol. 2005 Nov;25(8):834-5]. *Journal of Obstetrics & Gynaecology.* 2005. 25:558-564 |
| **P. G. Lindqvist, K. Marsal, J. Merlo and J. P. Pirhonen.** Thermal response to submaximal exercise before, during and after pregnancy: a longitudinal study. *Journal of Maternal-Fetal & Neonatal Medicine.* 2003. 13:152-156 |
| **P. Gawade, P. Pekow, G. Markenson, M. Plevyak, W. Goh and L. Chasan-Taber.** Physical activity before and during pregnancy and duration of second stage of labor among Hispanic women. *J.Reprod.Med.* 2009. 54:429-435 |
| **P. Gawade, P. Pekow, G. Markenson, M. Plevyak, W. Goh and L. Chasan-Taber.** Physical activity before and during pregnancy and duration of second stage of labor among Hispanic women. 2009. 54:429-435 |
| **P. J. Kulpa, B. M. White and R. Visscher.** Aerobic exercise in pregnancy. *American Journal of Obstetrics & Gynecology.* 1987. 156:1395-1403 |
| **P. J. O'Connor, M. S. Poudevigne, M. E. Cress, R. W. Motl and J. F. Clapp 3rd.** Safety and efficacy of supervised strength training adopted in pregnancy. 2011. 8:309-320 |
| **P. J. Ohtake and L. A. Wolfe.** Physical conditioning attenuates respiratory responses to steady-state exercise in late gestation. *Medicine & Science in Sports & Exercise.* 1998. 30:17-27 |
| **P. J. Ohtake and L. A. Wolfe.** Physical conditioning attenuates respiratory responses to steady-state exercise in late gestation. 1998. 30:17-27 |
| **P. J. Ohtake and L. A. Wolfe.** Physical conditioning attenuates respiratory responses to steady-state exercise in late gestation. *Med.Sci.Sports Exerc.* 1998. 30:17-27 |
| **P. J. Reis and M. R. Alligood.** Prenatal yoga in late pregnancy and optimism, power, and well-being. 2014. 27:30-36 |
| **P. Kolu, J. Raitanen and R. Luoto.** Physical activity and health-related quality of life during pregnancy: a secondary analysis of a cluster-randomised trial. 2014. 18:2098-2105 |
| **P. Kolu, J. Raitanen, P. Rissanen and R. Luoto.** Cost-effectiveness of lifestyle counselling as primary prevention of gestational diabetes mellitus: findings from a cluster-randomised trial. 2013. 8:e56392 |
[truncated: 238,606 more chars]
